# Supplementary material for: The transcription factor RUNX2 drives the generation of human NK cells and promotes tissue residency
Source: eLife. 2022 Jul 6;11:e80320. doi: 10.7554/eLife.80320 (PMC9259014; doi:10.7554/eLife.80320)
Supplement: Supplementary file 1. [file elife-80320-supp1.xlsx]

## Sheet: Supplementary file 1
	Supplementary file 1. RUNX2 ChIP-seq of sorted human peripheral blood NK cells (accompanies Fig. 2B, 3A-C, Figure 3-supplement figure 1, Figure 4-supplement figure 1).
	Gene List	Chromosome	Gene Start	Gene End	Length	Peak Summit	Peak Val	Dist to Start	Position
	A1BG, A1BG-AS1, ZNF497, LOC105372483	19	58356116	58356396	280	58356224	20	-2725, 4254, 6624, -5365	upstream, downstream, in gene, upstream
	A1BG, A1BG-AS1, ZNF497, LOC105372483	19	58356488	58356764	276	58356656	18	-3157, 4686, 6192, -4933	upstream, downstream, in gene, upstream
	A1BG, A1BG-AS1, ZNF497, LOC105372483, ZNF837	19	58362235	58363156	921	58362752	34	-9253, 10782, 96, 1163, 18270	upstream, downstream, in gene, in gene, downstream
	AAAS, SP7	12	53321456	53321701	245	53321536	25	92, 23257	in gene, downstream
	AAAS, SP7	12	53324613	53325420	807	53325120	20	-3492, 19673	upstream, downstream
	AACS	12	125065412	125065810	398	125065632	24	253	in gene
	AADAT, LOC105377532	4	170092113	170092373	260	170092256	36	-557, 113	upstream, in gene
	AADAT, LOC105377532	4	170097687	170097997	310	170097808	26	-6109, 5665	upstream, in gene
	AAED1	9	96654796	96655130	334	96654912	17	411	in gene
	AAGAB, IQCH	15	67254745	67254978	233	67254784	27	414, 10	in gene, in gene
	AAK1	2	69622112	69622358	246	69622208	15	21637	in gene
	AAK1, ANXA4	2	69643666	69644698	1032	69644480	34	-635, 380	upstream, in gene
	AARS, DDX19B	16	70289150	70289645	495	70289472	48	78, -295	in gene, upstream
	AARS, DDX19B	16	70299109	70299351	242	70299200	35	-9650, 9433	upstream, in gene
	AARS2, LOC105375073	6	44313104	44313446	342	44313312	24	46, 6369	in gene, downstream
	ABCA1, LOC102724761, LOC105376196	9	104926473	104926788	315	104926592	36	1654, 20383, -585	in gene, downstream, upstream
	ABCA2, C9orf139, FUT7, NPDC1	9	137029886	137032058	2172	137030752	69	-1778, 3288, 2088, 15472	upstream, in gene, in gene, downstream
	ABCA2, C9orf139, FUT7, NPDC1	9	137028465	137029712	1247	137029376	60	-402, 1912, 3464, 16848	upstream, in gene, downstream, downstream
	ABCA2, C9orf139, FUT7, NPDC1	9	137034473	137034772	299	137034624	25	-5650, 7160, -1784, 11600	upstream, in gene, upstream, downstream
	ABCA5, LOC105371878	17	69326723	69327524	801	69327072	46	110, -4772	in gene, upstream
	ABCA7, HMHA1	19	1067031	1067787	756	1067360	56	27257, 1437	downstream, in gene
	ABCA7, HMHA1	19	1068406	1068720	314	1068576	27	28473, 2653	downstream, in gene
	ABCA7, HMHA1	19	1074437	1074652	215	1074592	19	34489, 8669	downstream, in gene
	ABCB1, RUNDC3B	7	87628338	87628537	199	87628352	26	84971, 677	in gene, in gene
	ABCB10, RNA5SP78	1	229558432	229558778	346	229558592	18	103, 8687	in gene, downstream
	ABCB10, RNA5SP78	1	229558946	229559246	300	229559112	17	-417, 9207	upstream, downstream
	ABCB9	12	122946881	122947121	240	122947040	19	28085	in gene
	ABCB9, OGFOD2, ARL6IP4, PITPNM2	12	122974474	122975521	1047	122974752	41	373, 49, -5308, 176058	in gene, in gene, upstream, downstream
	ABCB9, OGFOD2, ARL6IP4, PITPNM2	12	122980596	122980989	393	122980768	38	-5643, 6065, 708, 170042	upstream, downstream, in gene, downstream
	ABCC1	16	15949791	15950138	347	15949936	27	359	in gene
	ABCC11, LONP2	16	48244177	48244833	656	48244336	39	-9159, 169	upstream, in gene
	ABCC4, LOC102724149	13	95301127	95301391	264	95301264	12	182, 632	in gene, in gene
	ABCD4, VRTN	14	74302829	74303043	214	74302880	16	184, -196	in gene, upstream
	ABCF2, CHPF2	7	151227145	151227431	286	151227264	22	110, -5225	in gene, upstream
	ABCF2, CHPF2, MIR671, SMARCD3	7	151232296	151232874	578	151232480	67	-5106, -9, -5941, 44669	upstream, upstream, upstream, downstream
	ABCG1	21	42193226	42193548	322	42193360	32	-6329	upstream
	ABCG1	21	42191975	42192237	262	42192096	21	-7593	upstream
	ABCG1	21	42190106	42190338	232	42190224	15	-9465	upstream
	ABCG4, NLRX1	11	119168730	119169181	451	119168800	20	19760, 466	downstream, in gene
	ABHD1, PREB, PRR30	2	27134380	27134669	289	27134560	15	10780, 114, 4904	downstream, in gene, downstream
	ABHD12, LOC105372581	20	25390250	25390706	456	25390400	20	582, 18243	in gene, downstream
	ABHD12, LOC105372581	20	25390974	25391191	217	25391088	15	-106, 17555	upstream, downstream
	ABHD12B	14	50875436	50875659	223	50875552	26	3462	in gene
	ABHD12B	14	50872112	50872380	268	50872272	14	182	in gene
	ABHD14A-ACY1, ACY1, RPL29	3	51995603	51996025	422	51995872	32	20846, 12588, 70	downstream, downstream, in gene
	ABHD15, TP53I13, GIT1	17	29566203	29566848	645	29566368	47	656, -812, 23224	in gene, upstream, downstream
	ABHD16B, TPD52L2	20	63864917	63865756	839	63865387	20	4174, 159	downstream, in gene
	ABHD16B, TPD52L2	20	63864381	63864595	214	63864512	16	3299, -716	downstream, upstream
	ABHD17A	19	1875689	1876495	806	1876128	162	9391	downstream
	ABHD17A	19	1885336	1885659	323	1885472	44	47	in gene
	ABHD17A	19	1883131	1883469	338	1883200	20	2319	in gene
	ABHD17A, ADAT3, SCAMP4	19	1895478	1895685	207	1895568	17	-10049, -9804, -9806	upstream, upstream, upstream
	ABHD17B, C9orf85	9	71910543	71911080	537	71910848	24	385, -473	in gene, upstream
	ABHD2	15	89130179	89130477	298	89130368	29	42218	in gene
	ABHD3, LOC105376866	18	21704373	21705073	700	21704736	44	69, -112	in gene, upstream
	ABHD6	3	58237626	58237914	288	58237712	17	206	in gene
	ABHD8, MRPL34, DDA1	19	17309257	17309852	595	17309568	37	-6095, 16790, 40	upstream, downstream, in gene
	ABHD8, MRPL34, DDA1	19	17305450	17306396	946	17305632	32	-2159, 12854, -3896	upstream, in gene, upstream
	ABHD8, MRPL34, DDA1	19	17303184	17303382	198	17303344	19	129, 10566, -6184	in gene, in gene, upstream
	ABI1	10	26860155	26861194	1039	26860608	148	479	in gene
	ABI3, PHOSPHO1, LOC105371816	17	49224451	49224764	313	49224608	47	14381, 7084, -265	downstream, in gene, upstream
	ABI3, PHOSPHO1, LOC105371816	17	49230627	49231032	405	49230784	45	20557, 908, 5911	downstream, in gene, downstream
	ABI3, PHOSPHO1, LOC105371816	17	49230042	49230369	327	49230192	15	19965, 1500, 5319	downstream, in gene, downstream
	ABL1	9	130834573	130835249	676	130834752	67	120871	in gene
	ABL2	1	179229318	179229700	382	179229408	18	285	in gene
	ABLIM1	10	114541150	114541592	442	114541360	56	280283	in gene
	ABLIM1	10	114526613	114527107	494	114526848	51	294795	in gene
	ABLIM1	10	114526163	114526505	342	114526336	28	295307	in gene
	ABLIM1, FAM160B1	10	114821765	114822223	458	114822112	24	-469, 368	upstream, in gene
	ABR	17	1109190	1109866	676	1109504	47	77818	in gene
	ABR, LOC105371479	17	1180139	1180395	256	1180256	24	7066, -155	in gene, upstream
	ABRACL	6	139028854	139029142	288	139028944	20	262	in gene
	ABRACL	6	139029328	139029572	244	139029504	15	822	in gene
	ABTB2	11	34248502	34248762	260	34248592	26	109416	in gene
	ABTB2	11	34357041	34357987	946	34357216	17	792	in gene
	ABTB2	11	34302515	34302742	227	34302624	14	55384	in gene
	ACAA1, MYD88	3	38136450	38137645	1195	38136992	70	250, -1486	in gene, upstream
	ACAA1, MYD88	3	38138574	38138811	237	38138688	26	-1446, 210	upstream, in gene
	ACAA2, SNHG22, SCARNA17, MYO5B	18	49812987	49814230	1243	49813712	39	169, -311, -311, 381369	in gene, upstream, upstream, downstream
	ACACA	17	37358706	37359418	712	37358976	31	47846	in gene
	ACACA, TADA2A	17	37407072	37407308	236	37407264	17	-442, 387	upstream, in gene
	ACADVL, DVL2, PHF23, GABARAP, CTDNEP1	17	7234335	7234534	199	7234432	27	17307, 116, 5285, 8002, 17508	downstream, in gene, downstream, downstream, downstream
	ACAP1, KCTD11, TMEM95	17	7351136	7352627	1491	7351872	51	15361, -17, -3262	downstream, upstream, upstream
	ACAP2	3	195442432	195443369	937	195443200	45	-24	upstream
	ACAP3, PUSL1, CPSF3L, MIR6727	1	1307989	1308478	489	1308224	51	-299, -347, 16463, 4342	upstream, upstream, downstream, downstream
	ACAP3, PUSL1, CPSF3L, MIR6727	1	1309248	1309486	238	1309328	18	-1403, 757, 15359, 3238	upstream, in gene, downstream, downstream
	ACAP3, PUSL1, CPSF3L, MIR6727	1	1307346	1307615	269	1307520	17	405, -1051, 17167, 5046	in gene, upstream, downstream, downstream
	ACAT1	11	108121394	108121806	412	108121632	24	101	in gene
	ACAT2, TCP1, SNORA20, SNORA29, MRPL18	6	159788824	159789826	1002	159789504	38	27547, 199, -9123, -3771, -956	downstream, in gene, upstream, upstream, upstream
	ACBD3, LOC101927247	1	226186500	226186829	329	226186624	18	98, -186	in gene, upstream
	ACBD4, HEXIM1	17	45148564	45148947	383	45148768	31	16168, 1451	downstream, in gene
	ACBD5	10	27242086	27242423	337	27242240	29	-101	upstream
	ACBD5	10	27225118	27225374	256	27225248	25	16891	in gene
	ACBD5	10	27240648	27241099	451	27240896	19	1243	in gene
	ACBD6	1	180502545	180503015	470	180502784	28	183	in gene
	ACBD7, C10orf111, RPP38	10	15088629	15088897	268	15088736	25	40, 8583, -8444	in gene, downstream, upstream
	ACBD7, C10orf111, RPP38, LOC105376431, NMT2	10	15097395	15097629	234	15097440	25	-8664, -121, 260, -7071, 71265	upstream, upstream, in gene, upstream, downstream
	ACCSL, ACCS	11	44066135	44066437	302	44066304	23	145220, 125	downstream, in gene
	ACOT11	1	54542063	54542799	736	54542352	20	-5782	upstream
	ACOT6	14	73612579	73612775	196	73612664	12	368	in gene
	ACOT7	1	6294675	6295248	573	6295072	43	98694	in gene
	ACOT7	1	6349057	6349262	205	6349184	19	44582	in gene
	ACOT7, LOC105376688	1	6393163	6394168	1005	6393696	43	70, 8113	in gene, downstream
	ACOX3	4	8409369	8409778	409	8409600	21	31125	in gene
	ACOX3, LOC105374376	4	8428399	8428780	381	8428504	23	12221, -7812	in gene, upstream
	ACOX3, LOC105374376, TRMT44	4	8440626	8441055	429	8440832	47	-107, 4516, 54	upstream, downstream, in gene
	ACOXL	2	110846477	110847252	775	110846656	38	114117	in gene
	ACOXL	2	110804952	110805210	258	110805104	19	72565	in gene
	ACOXL, LOC400997, BCL2L11	2	111120890	111121912	1022	111121088	34	388549, -5500, 470	downstream, upstream, in gene
	ACOXL, LOC400997, BCL2L11	2	111122093	111122644	551	111122176	32	389637, -6588, 1558	downstream, upstream, in gene
	ACOXL, LOC400997, BCL2L11	2	111120423	111120759	336	111120576	25	388037, -4988, -42	in gene, upstream, upstream
	ACOXL, LOC400997, BCL2L11	2	111119100	111119345	245	111119168	15	386629, -3580, -1450	in gene, upstream, upstream
	ACOXL, LOC400997, BCL2L11	2	111122843	111123149	306	111122848	15	390309, -7260, 2230	downstream, upstream, in gene
	ACP5, ZNF627	19	11578812	11579052	240	11578944	15	42, 3672	in gene, in gene
	ACP6	1	147648256	147648561	305	147648384	28	22128	in gene
	ACRC, CXCR3	X	71616438	71617458	1020	71616896	36	38872, 1621	downstream, in gene
	ACRC, CXCR3	X	71622642	71622949	307	71622816	30	44792, -4299	downstream, upstream
	ACSF2, CHAD, RSAD1	17	50478602	50479146	544	50478784	37	52626, -8903, -16	downstream, upstream, upstream
	ACSL1, LOC105377587	4	184826160	184826744	584	184826528	41	-414, 298	upstream, in gene
	ACSL1, LOC105377587	4	184825566	184826074	508	184825728	32	386, -502	in gene, upstream
	ACSL3	2	222860806	222861729	923	222861184	55	200	in gene
	ACSL4, LOC105373311	X	109733145	109733381	236	109733248	22	144, 2283	in gene, in gene
	ACSL6	5	132020234	132020437	203	132020352	30	-8284	upstream
	ACSL6, LOC101927693	5	132011597	132012196	599	132011808	63	260, 9768	in gene, downstream
	ACSM3, ERI2, LOC81691	16	20806234	20806466	232	20806304	22	42314, 169, -125	downstream, in gene, upstream
	ACSS1	20	25057086	25058747	1661	25057296	101	886	in gene
	ACTG2, DGUOK	2	73926820	73927110	290	73926960	18	33994, 134	downstream, in gene
	ACTL6A, LOC105374238	3	179562773	179563219	446	179563072	31	192, 13765	in gene, downstream
	ACTN1, ACTN1-AS1	14	68977726	68978722	996	68977936	49	1430, -1746	in gene, upstream
	ACTN1, ACTN1-AS1	14	68979286	68979488	202	68979424	18	-58, -258	upstream, upstream
	ACTN4	19	38664311	38664514	203	38664416	24	16800	in gene
	ACTN4	19	38681174	38681370	196	38681259	15	33643	in gene
	ACTN4, CAPN12	19	38736165	38736404	239	38736256	25	88640, 8218	downstream, in gene
	ACTR10, TRK-CTT1-1, PSMA3	14	58244731	58245196	465	58244848	29	44733, -4881, 43	downstream, upstream, in gene
	ACTR1A, SUFU	10	102502012	102502523	511	102502368	23	387, -506	in gene, upstream
	ACTR1B, LINC01125	2	97664036	97664344	308	97664192	28	-94, -5551	upstream, upstream
	ACTR2	2	65227515	65228286	771	65227824	29	129	in gene
	ACTR5	20	38748294	38748808	514	38748688	37	430	in gene
	ACTR6, DEPDC4	12	100200858	100201176	318	100201008	27	921, 66164	in gene, downstream
	ACVR1, LOC105373714	2	157876098	157876464	366	157876320	23	-458, -246	upstream, upstream
	ACVR1B, GRASP	12	52005874	52006070	196	52005952	19	54285, -985	downstream, upstream
	ACVR1B, GRASP	12	52006814	52007147	333	52006992	17	55325, 55	downstream, in gene
	ACVR1C	2	157628694	157628897	203	157628784	19	103	in gene
	ACVR2A	2	147843784	147845637	1853	147844192	60	-325	upstream
	ADAM10	15	58614766	58615114	348	58614912	31	135066	in gene
	ADAM10	15	58749779	58750059	280	58749920	15	58	in gene
	ADAM17, LOC101929643	2	9555518	9556225	707	9555776	52	12, -9865	in gene, upstream
	ADAM8, TUBGCP2	10	133278487	133279419	932	133278752	60	-1849, 33585	upstream, in gene
	ADAM8, TUBGCP2	10	133276629	133276833	204	133276768	18	135, 35569	in gene, downstream
	ADAM8, TUBGCP2	10	133275096	133275320	224	133275200	17	1703, 37137	in gene, downstream
	ADAM8, TUBGCP2	10	133277173	133277410	237	133277296	17	-393, 35041	upstream, downstream
	ADAM8, TUBGCP2	10	133277522	133277771	249	133277600	15	-697, 34737	upstream, downstream
	ADAMTS1	21	26844358	26844667	309	26844512	22	897	in gene
	ADAMTS1, LOC105372760	21	26845470	26845683	213	26845568	26	-159, -9312	upstream, upstream
	ADAMTS10	19	8609614	8609902	288	8609776	18	977	in gene
	ADAMTS13, CACFD1	9	133459441	133459654	213	133459584	20	45245, -381	downstream, upstream
	ADAMTS13, CACFD1	9	133459975	133460420	445	133460256	20	45917, 291	downstream, in gene
	ADAMTS17	15	100201653	100202215	562	100202048	35	140039	in gene
	ADAMTS17, SPATA41, LOC105371021	15	100341656	100342275	619	100341952	48	135, 8766, -7654	in gene, downstream, upstream
	ADAMTS4, NDUFS2	1	161202009	161202345	336	161202112	19	-3057, 4693	upstream, in gene
	ADAMTS7P1	15	82298578	82298852	274	82298704	34	5421	in gene
	ADAMTSL4-AS1, MCL1	1	150579170	150579588	418	150579392	26	-4840, 346	upstream, in gene
	ADAP1	7	923039	923975	936	923408	47	31999	in gene
	ADAP1	7	922007	922274	267	922176	24	33231	in gene
	ADAP1	7	922589	922785	196	922656	19	32751	in gene
	ADAP1	7	949721	949952	231	949872	19	5535	in gene
	ADAP1	7	930158	930386	228	930240	18	25167	in gene
	ADAP1	7	924703	925027	324	924864	16	30543	in gene
	ADAP1	7	937956	938172	216	938037	14	17370	in gene
	ADAR	1	154627628	154627941	313	154627776	22	237	in gene
	ADAR	1	154607991	154608279	288	154608064	14	19949	in gene
	ADARB2	10	1253720	1254299	579	1253888	59	483610	in gene
	ADAT1, KARS	16	75623168	75623380	212	75623184	12	139, 24503	in gene, downstream
	ADAT3, SCAMP4	19	1897425	1898237	812	1897760	32	-7612, -7614	upstream, upstream
	ADAT3, SCAMP4	19	1909065	1909314	249	1909120	28	3748, 3746	in gene, in gene
	ADCK1	14	77800133	77800356	223	77800192	17	127	in gene
	ADCK2, NDUFB2-AS1, NDUFB2	7	140696691	140697197	506	140696896	21	23971, 181, 215	downstream, in gene, in gene
	ADCK3	1	226940217	226940707	490	226940384	87	147	in gene
	ADCK3	1	226939732	226940074	342	226939952	30	-285	upstream
	ADCK4, ITPKC	19	40716904	40717245	341	40717056	35	-96, 76	upstream, in gene
	ADCY3	2	24920578	24920774	196	24920720	15	-987	upstream
	ADCY4, RIPK3	14	24329674	24330171	497	24329920	126	5151, 10116	in gene, downstream
	ADCY4, RIPK3	14	24332130	24332363	233	24332192	23	2879, 7844	in gene, downstream
	ADCY4, RIPK3	14	24331726	24331928	202	24331744	19	3327, 8292	in gene, downstream
	ADCY5	3	123448202	123448998	796	123448352	27	286	in gene
	ADCY7	16	50281978	50282432	454	50282112	44	37363	in gene
	ADCY7	16	50266345	50266722	377	50266496	40	21747	in gene
	ADCY7	16	50274384	50274667	283	50274496	23	29747	in gene
	ADCY7	16	50246271	50246583	312	50246432	20	1683	in gene
	ADCY7, BRD7	16	50327207	50327473	266	50327296	29	82547, 41670	downstream, in gene
	ADCY9	16	4116721	4116917	196	4116832	20	-647	upstream
	ADCY9	16	4115578	4115851	273	4115680	19	505	in gene
	ADD1	4	2914653	2915347	694	2915024	103	71297	in gene
	ADD1, MFSD10	4	2922778	2923054	276	2922864	24	79137, 12004	in gene, downstream
	ADD1, MFSD10, NOP14-AS1, NOP14	4	2934815	2935416	601	2934976	62	91249, -108, -570, 28530	downstream, upstream, upstream, downstream
	ADD3-AS1, ADD3	10	110008030	110008713	683	110008176	28	205, 11811	in gene, in gene
	ADD3-AS1, ADD3	10	110007440	110007801	361	110007552	20	829, 11187	in gene, in gene
	ADGRA2, BRF2, RAB11FIP1	8	37849744	37850058	314	37849872	27	52989, 41, 49625	downstream, in gene, downstream
	ADGRB1	8	142452437	142452640	203	142452523	14	2635	in gene
	ADGRE5, DDX39A	19	14418184	14418659	475	14418320	30	37176, 1063	downstream, in gene
	ADGRG5, LOC105371291	16	57577781	57578300	519	57578080	38	48747, 29272	downstream, in gene
	ADGRL1	19	14206805	14207113	308	14206976	30	-728	upstream
	ADGRL1	19	14205523	14205857	334	14205680	19	568	in gene
	ADI1	2	3518766	3519566	800	3519072	79	507	in gene
	ADIPOR1, CYB5R1	1	202957984	202958432	448	202958208	45	364, 9068	in gene, downstream
	ADIPOR2	12	1690691	1691490	799	1690976	144	-5	upstream
	ADIPOR2, CACNA2D4, LOC105369602	12	1797142	1797577	435	1797392	23	106411, 123473, -3227	downstream, in gene, upstream
	ADIPOR2, CACNA2D4, LOC105369602	12	1796652	1796848	196	1796752	18	105771, 124113, -3867	downstream, in gene, upstream
	ADK	10	74176509	74176722	213	74176544	23	25359	in gene
	ADNP, ADNP-AS1, DPM1	20	50931429	50931918	489	50931744	43	-754, 760, 26817	upstream, in gene, downstream
	ADO, EGR2	10	62804585	62805254	669	62804832	29	76, 115063	in gene, downstream
	ADO, EGR2	10	62816527	62816924	397	62816672	25	11916, 103223	downstream, in gene
	ADO, EGR2	10	62817180	62817494	314	62817280	24	12524, 102615	downstream, in gene
	ADO, EGR2	10	62815141	62815387	246	62815232	15	10476, 104663	downstream, in gene
	ADO, EGR2	10	62817965	62818278	313	62818176	14	13420, 101719	downstream, in gene
	ADPGK	15	72783562	72784073	511	72783872	42	-87	upstream
	ADPGK	15	72785436	72785701	265	72785600	22	-1815	upstream
	ADPRH	3	119579586	119579943	357	119579744	14	311	in gene
	ADRA1B, LOC101927790	5	159933637	159934028	391	159933824	40	17091, 3668	in gene, downstream
	ADRB2	5	148826176	148826390	214	148826288	21	-305	upstream
	ADRBK1, ANKRD13D	11	67288221	67289269	1048	67288576	117	22176, -715	downstream, upstream
	ADRBK1, ANKRD13D	11	67286061	67286501	440	67286320	38	19920, -2971	in gene, upstream
	ADRBK1, ANKRD13D	11	67285299	67285495	196	67285392	23	18992, -3899	in gene, upstream
	ADRBK1, ANKRD13D	11	67285720	67285926	206	67285792	22	19392, -3499	in gene, upstream
	ADRBK1, ANKRD13D	11	67286960	67287156	196	67287056	17	20656, -2235	downstream, upstream
	ADRBK1, ANKRD13D	11	67289450	67289718	268	67289568	15	23168, 277	downstream, in gene
	ADRBK1, LOC105369356	11	67276841	67277825	984	67277632	43	11232, -3573	in gene, upstream
	ADRBK1, LOC105369356	11	67269021	67269581	560	67269104	27	2704, 4955	in gene, in gene
	ADRBK1, LOC105369356	11	67271716	67271912	196	67271808	23	5408, 2251	in gene, in gene
	ADSL, SGSM3	22	40370724	40371052	328	40370768	18	24268, 206	in gene, in gene
	ADSS, C1orf101	1	244451727	244452215	488	244452032	28	102, -68	in gene, upstream
	ADSSL1, SIVA1	14	104752879	104753312	433	104753120	39	28923, 700	downstream, in gene
	AEBP1, POLD2, RNA5SP230	7	44123378	44123911	533	44123696	44	19376, -28, 2177	downstream, upstream, downstream
	AEBP2	12	19439708	19440245	537	19440032	23	540	in gene
	AEBP2	12	19439404	19439617	213	19439520	20	28	in gene
	AEN, MIR7-2, MIR3529	15	88621340	88621537	197	88621440	15	16759, 9615, -9516	in gene, downstream, upstream
	AES, LOC105372242	19	3061277	3061665	388	3061456	27	1651, 14012	in gene, downstream
	AFF1	4	87006627	87007361	734	87006816	26	72305	in gene
	AFF2	X	148500865	148501061	196	148500992	14	373	in gene
	AFF4, LOC105379177	5	132963390	132964039	649	132963664	29	-2, -971	upstream, upstream
	AFG3L2	18	12376778	12377381	603	12377184	28	125	in gene
	AFMID, BIRC5	17	78214041	78214463	422	78214176	27	29074, -20	downstream, upstream
	AGA, LOC285500	4	177442022	177442487	465	177442256	41	247, -2257	in gene, upstream
	AGAP2, AGAP2-AS1, TSPAN31, CDK4	12	57737581	57737777	196	57737728	19	4473, 11488, -6362, 14719	in gene, downstream, upstream, downstream
	AGBL4, BEND5	1	48776612	48776970	358	48776784	19	1247170, 185	in gene, in gene
	AGBL5, OST4, EMILIN1	2	27071553	27072254	701	27071776	40	20353, -77, -6791	downstream, upstream, upstream
	AGFG2	7	100538995	100539500	505	100539296	30	85	in gene
	AGFG2, SAP25, LRCH4, ZASP	7	100570126	100570412	286	100570208	26	30997, 3656, 15980, 4525	downstream, downstream, downstream, downstream
	AGL	1	99849866	99850347	481	99850080	26	3	in gene
	AGMAT	1	15584775	15585016	241	15584880	13	230	in gene
	AGO1, AGO3	1	35930649	35931426	777	35931168	76	61377, 7765	downstream, in gene
	AGO2	8	140635915	140636160	245	140636016	20	6310	in gene
	AGO2	8	140580858	140581080	222	140580928	19	61398	in gene
	AGO2	8	140596865	140597333	468	140597013	19	45313	in gene
	AGO2	8	140591324	140591637	313	140591560	14	50766	in gene
	AGPAT3	21	43958214	43958829	615	43958496	39	93336	in gene
	AGPAT3	21	43918093	43918448	355	43918272	38	53112	in gene
	AGPAT3	21	43865698	43866042	344	43865888	29	728	in gene
	AGPAT3	21	43959225	43959798	573	43959584	29	94424	in gene
	AGPAT3	21	43917477	43917901	424	43917760	26	52600	in gene
	AGPAT3	21	43864342	43864733	391	43864352	18	-808	upstream
	AGPAT4	6	161243271	161243512	241	161243392	38	30683	in gene
	AGPAT4	6	161226406	161226763	357	161226560	21	47515	in gene
	AGPS, TTC30B	2	177552482	177553204	722	177552752	85	160009, 44	downstream, in gene
	AGRN	1	1041260	1041632	372	1041440	30	21339	in gene
	AGRN	1	1040696	1040892	196	1040768	22	20667	in gene
	AGRN	1	1032923	1033205	282	1033056	15	12955	in gene
	AGTPBP1	9	85741398	85742148	750	85741920	34	109	in gene
	AHCTF1	1	246931548	246931907	359	246931744	34	234	in gene
	AHCY	20	34302879	34303274	395	34303072	27	8904	in gene
	AHCYL2	7	129224600	129225444	844	129225152	24	138	in gene
	AHCYL2	7	129262444	129262650	206	129262528	16	37514	in gene
	AHCYL2, LOC105375498, STRIP2	7	129434260	129434771	511	129434592	19	209578, -281, 159	downstream, upstream, in gene
	AHDC1	1	27568614	27568834	220	27568784	17	35394	in gene
	AHDC1, FGR	1	27603251	27603474	223	27603360	19	818, 32201	in gene, downstream
	AHI1, LINC00271	6	135497540	135498304	764	135497760	90	5, -41	in gene, upstream
	AHNAK, EEF1G, MIR6747	11	62556431	62557104	673	62556832	77	-9972, 17156, 10239	upstream, downstream, downstream
	AHNAK, LOC101927617	11	62546157	62546895	738	62546699	29	161, 931	in gene, downstream
	AHNAK, LOC101927617	11	62543460	62543819	359	62543520	23	3340, -2248	in gene, upstream
	AHNAK, LOC101927617	11	62542948	62543150	202	62543072	15	3788, -2696	in gene, upstream
	AHRR, EXOC3-AS1, EXOC3	5	442874	443122	248	442912	22	138736, 248, -297	downstream, in gene, upstream
	AHSA2	2	61176876	61177226	350	61177024	27	-396	upstream
	AIDA, BROX	1	222712368	222712841	473	222712496	61	405, -57	in gene, upstream
	AIF1, PRRC2A, SNORA38	6	31620136	31621202	1066	31620832	100	5640, 159, -2247	downstream, in gene, upstream
	AIF1L, NUP214	9	131125458	131125763	305	131125600	43	29124, 641	downstream, in gene
	AIFM1, RAB33A	X	130165924	130166308	384	130166016	14	-129, -5783	upstream, upstream
	AIFM3, LZTR1	22	20981897	20982475	578	20982176	57	17046, -93	downstream, upstream
	AIG1	6	143060288	143060785	497	143060576	48	1213	in gene
	AIM1	6	106512739	106513080	341	106512896	16	152088	in gene
	AIM1L, ZNF683	1	26363916	26364157	241	26363984	26	-9854, 10549	upstream, in gene
	AIM1L, ZNF683	1	26360125	26360353	228	26360272	20	-6142, 14261	upstream, downstream
	AIP, MIR6752, PITPNM1	11	67493647	67493849	202	67493664	21	10635, 3419, 11708	downstream, downstream, in gene
	AIPL1	17	6427482	6427786	304	6427616	45	7583	in gene
	AIPL1, FAM64A, PITPNM3	17	6444179	6444554	375	6444384	35	-9185, 179, 112173	upstream, in gene, downstream
	AIRE, PFKL	21	44299605	44299907	302	44299712	24	13874, -322	downstream, upstream
	AJUBA, C14orf93	14	22981369	22981671	302	22981376	12	1266, 28825	in gene, downstream
	AK3	9	4740732	4741584	852	4741088	62	955	in gene
	AK6, TAF9, RAD17	5	69369314	69369780	466	69369584	35	429, 429, 287	in gene, in gene, in gene
	AK8, C9orf9	9	132878044	132878430	386	132878208	18	603, -687	in gene, upstream
	AKAP1	17	57084978	57086081	1103	57085611	20	419	in gene
	AKAP10	17	19977825	19978202	377	19977984	24	-128	upstream
	AKAP10	17	19977487	19977744	257	19977536	20	320	in gene
	AKAP11	13	42271491	42272452	961	42272288	39	807	in gene
	AKAP13, LOC105370950	15	85625965	85626161	196	85626064	17	245448, 6840	in gene, in gene
	AKAP8, AKAP8L	19	15379145	15380359	1214	15379936	39	-108, 39185	upstream, downstream
	AKAP8L, WIZ	19	15418411	15419215	804	15418896	108	225, 31060	in gene, downstream
	AKAP9	7	91940727	91941077	350	91940928	25	61	in gene
	AKIRIN1	1	38990894	38991622	728	38991440	31	196	in gene
	AKIRIN2	6	87701312	87702351	1039	87701664	26	603	in gene
	AKNA	9	114369679	114369999	320	114369856	36	28695	in gene
	AKNA	9	114373043	114373440	397	114373216	31	25335	in gene
	AKNA	9	114367728	114367931	203	114367840	16	30711	in gene
	AKNA	9	114366424	114366620	196	114366496	15	32055	in gene
	AKNA, LOC105376227	9	114385453	114385998	545	114385824	32	12727, -2282	in gene, upstream
	AKNA, LOC105376227	9	114383095	114383393	298	114383248	19	15303, -4858	in gene, upstream
	AKNA, LOC105376227, DFNB31	9	114398193	114398647	454	114398352	23	199, 10246, 107157	in gene, downstream, downstream
	AKNA, LOC105376227, DFNB31	9	114397816	114398071	255	114397904	19	647, 9798, 107605	in gene, downstream, downstream
	AKR1B1	7	134458712	134459360	648	134459152	87	-16	upstream
	AKR7A2, PQLC2	1	19312186	19312625	439	19312384	47	-238, 138	upstream, in gene
	AKT1, ZBTB42	14	104794896	104795153	257	104794976	17	767, -5620	in gene, upstream
	AKT2, MIR641, LOC105372400, C19orf47	19	40284708	40285365	657	40285184	33	347, -2543, -1247, 63343	in gene, upstream, upstream, downstream
	AKT3	1	243849428	243850075	647	243849664	49	1415	in gene
	AKT3	1	243850551	243851178	627	243850624	28	455	in gene
	AKTIP, LOC105371268	16	53502661	53503170	509	53502976	28	1435, 16559	in gene, downstream
	AKTIP, LOC105371268	16	53503443	53503788	345	53503680	21	731, 15855	in gene, downstream
	ALAD, POLE3, C9orf43	9	113410112	113410932	820	113410528	39	-9190, 221, -116	upstream, in gene, upstream
	ALAD, POLE3, C9orf43	9	113401007	113401414	407	113401216	36	122, 9533, -9428	in gene, downstream, upstream
	ALAS1	3	52197901	52198256	355	52198096	19	13	in gene
	ALDH16A1, FLT3LG	19	49469157	49469578	421	49469344	104	16128, -4828	in gene, upstream
	ALDH16A1, FLT3LG	19	49469674	49470544	870	49470336	85	17120, -3836	in gene, upstream
	ALDH16A1, FLT3LG	19	49473990	49474301	311	49474112	21	20896, -60	downstream, upstream
	ALDH18A1, TCTN3	10	95656358	95656728	370	95656448	16	362, 37695	in gene, downstream
	ALDH3A2	17	19648649	19649220	571	19648811	33	675	in gene
	ALDH3B1, LOC105369361, NDUFS8, MIR7113, MIR4691, TCIRG1, MIR6753	11	68036432	68037243	811	68037056	25	28509, -6464, 6439, 4192, 3159, -1939, -7738	downstream, upstream, downstream, downstream, downstream, upstream, upstream
	ALDH3B1, LOC105369361, NDUFS8, MIR7113, MIR4691, TCIRG1, MIR6753	11	68038886	68039172	286	68039040	18	30493, -8448, 8423, 6176, 5143, 45, -5754	downstream, upstream, downstream, downstream, downstream, in gene, upstream
	ALDH7A1, PHAX	5	126600908	126601354	446	126601152	26	-5762, 237	upstream, in gene
	ALDH9A1, LOC105371581	1	165698377	165698580	203	165698485	16	178, 11015	in gene, downstream
	ALDOA	16	30064946	30065698	752	30065408	61	12318	in gene
	ALDOA, PPP4C, TBX6	16	30075832	30076142	310	30075952	35	22862, -24, 15985	downstream, upstream, downstream
	ALG10, LOC105376677	12	34022414	34022664	250	34022496	15	215, -6168	in gene, upstream
	ALG10B	12	38316704	38316953	249	38316768	18	82	in gene
	ALG12, CRELD2	22	49918190	49918695	505	49918336	66	122, -294	in gene, upstream
	ALG13	X	111681152	111681577	425	111681376	19	634	in gene
	ALG1L2, LOC105374105	3	130095947	130096186	239	130096032	19	14201, -942	in gene, upstream
	ALG5, EXOSC8, SUPT20H	13	36999161	36999488	327	36999280	34	87, -1093, 60433	in gene, upstream, downstream
	ALG6	1	63367616	63368014	398	63367808	29	218	in gene
	ALG8, KCTD21-AS1	11	78139417	78139768	351	78139552	25	108, -241	in gene, upstream
	ALG9, FDXACB1, C11orf1	11	111871107	111871437	330	111871264	19	317, 8193, -7934	in gene, downstream, upstream
	ALLC, LOC105373393, DCDC2C	2	3703542	3703770	228	3703616	14	45432, -116, 24	downstream, upstream, in gene
	ALOX12-AS1, ALOX12, RNASEK-C17orf49, RNASEK, C17orf49, MIR497HG, MIR195, MIR497	17	7012370	7012635	265	7012480	17	-146, 18284, 63, 63, -2257, 7174, 5221, 5542	upstream, downstream, in gene, in gene, upstream, downstream, downstream, downstream
	ALOX12-AS1, ALOX12, RNASEK-C17orf49, RNASEK, C17orf49, MIR497HG, MIR195, MIR497, BCL6B	17	7014641	7015690	1049	7014800	29	-2466, 20604, 2383, 2383, 63, 4854, 2901, 3222, -8250	upstream, downstream, in gene, downstream, in gene, downstream, downstream, downstream, upstream
	ALOX12-AS1, ALOX12, RNASEK-C17orf49, RNASEK, C17orf49, MIR497HG, MIR195, MIR497, BCL6B	17	7017834	7018032	198	7017920	19	-5586, 23724, 5503, 5503, 3183, 1734, -219, 102, -5130	upstream, downstream, downstream, downstream, downstream, in gene, upstream, in gene, upstream
	ALOX12-AS1, ALOX12, RNASEK-C17orf49, RNASEK, C17orf49, MIR497HG, MIR195, MIR497, BCL6B	17	7014273	7014489	216	7014336	15	-2002, 20140, 1919, 1919, -401, 5318, 3365, 3686, -8714	upstream, downstream, in gene, in gene, upstream, downstream, downstream, downstream, upstream
	ALOX15B, LOC105371518	17	8056308	8056504	196	8056448	22	17408, -452	downstream, upstream
	ALOX5	10	45419084	45419285	201	45419232	22	45056	in gene
	ALOX5	10	45374449	45374708	259	45374560	14	384	in gene
	ALOX5AP	13	30744217	30744625	408	30744464	58	30986	in gene
	ALOXE3, TRK-TTT3-4, LOC105371522, TRQ-CTG1-2, TRL-TAG1-1, HES7, TRR-TCT2-1, TRG-GCC2-4, LOC105376799	17	8125456	8125727	271	8125632	14	-6716, 6477, 5886, 5880, -5237, 107, 4707, -114, -2937	upstream, downstream, in gene, downstream, upstream, in gene, downstream, upstream, upstream
	ALS2, LOC105373840, CDK15	2	201780733	201781105	372	201780885	24	287, -167, -9574	in gene, upstream, upstream
	ALYREF, ANAPC11, NPB	17	81891602	81892210	608	81891808	60	-186, 1018, -10388	upstream, in gene, upstream
	AMD1	6	110875044	110876375	1331	110875296	34	60675	in gene
	AMD1	6	110874082	110874730	648	110874608	25	59987	in gene
	AMDHD2, CEMP1, MIR3178, PDPK1	16	2531552	2532010	458	2531808	47	11446, -400, 197, -6156	downstream, upstream, downstream, upstream
	AMER1, LOC105373237	X	64205813	64206392	579	64205936	22	462, -34	in gene, upstream
	AMICA1	11	118202689	118202895	206	118202784	24	22310	in gene
	AMICA1, MPZL3	11	118227702	118228202	500	118228032	49	-2938, 24336	upstream, in gene
	AMN1, LOC105369722	12	31728902	31729280	378	31729056	38	1336, 5548	in gene, downstream
	AMN1, LOC105369722	12	31723168	31723421	253	31723280	32	7112, -228	in gene, upstream
	AMOTL1	11	94768738	94769065	327	94768896	16	62460	in gene
	AMPD3	11	10442073	10442435	362	10442208	32	-8113	upstream
	AMT, NICN1	3	49429189	49429665	476	49429312	19	-6634, 12	upstream, in gene
	AMZ1	7	2698899	2699303	404	2699040	40	19518	in gene
	AMZ2	17	68205278	68205738	460	68205536	40	-461	upstream
	AMZ2	17	68205842	68206111	269	68205952	17	-45	upstream
	AMZ2, ARSG	17	68247383	68248280	897	68247680	83	41683, -9479	in gene, upstream
	AMZ2, ARSG, SLC16A6	17	68259135	68259331	196	68259184	16	53187, 2025, 32080	downstream, in gene, downstream
	ANAPC13, CEP63	3	134485456	134486558	1102	134486272	159	-249, 539	upstream, in gene
	ANAPC2, SSNA1, TPRN	9	137188501	137189023	522	137188832	36	-227, 230, 11879	upstream, in gene, downstream
	ANAPC5	12	121352158	121352884	726	121352384	99	1825	in gene
	ANAPC7	12	110403397	110403631	234	110403520	14	210	in gene
	ANGEL1	14	76812557	76813149	592	76812816	31	15657	in gene
	ANGPTL6, PPAN-P2RY11, PPAN, SNORD105, SNORD105B, P2RY11, EIF3G	19	10114040	10114686	646	10114336	38	-8127, 8113, 8113, 6685, 4587, 2815, 5587	upstream, in gene, downstream, downstream, downstream, in gene, downstream
	ANGPTL6, PPAN-P2RY11, PPAN, SNORD105, SNORD105B, P2RY11, EIF3G	19	10106246	10106597	351	10106432	25	-223, 209, 209, -1219, -3317, -5089, 13491	upstream, in gene, in gene, upstream, upstream, upstream, downstream
	ANGPTL6, PPAN-P2RY11, PPAN, SNORD105, SNORD105B, P2RY11, EIF3G	19	10115631	10115902	271	10115760	20	-9551, 9537, 9537, 8109, 6011, 4239, 4163	upstream, downstream, downstream, downstream, downstream, downstream, in gene
	ANGPTL6, PPAN-P2RY11, PPAN, SNORD105, SNORD105B, P2RY11, EIF3G	19	10104971	10105167	196	10105104	13	1105, -1119, -1119, -2547, -4645, -6417, 14819	in gene, upstream, upstream, upstream, upstream, upstream, downstream
	ANK3, LOC105378320	10	60733100	60733296	196	60733232	16	294, 2848	in gene, in gene
	ANKDD1A	15	64901991	64902242	251	64902048	22	-9854	upstream
	ANKH	5	14871554	14871750	196	14871712	16	66	in gene
	ANKHD1-EIF4EBP3, ANKHD1	5	140401159	140402011	852	140401424	30	-390, -390	upstream, upstream
	ANKLE2, LOC105370095, GOLGA3	12	132761101	132761785	684	132761536	32	352, -624, 67582	in gene, upstream, downstream
	ANKLE2, LOC105370095, GOLGA3	12	132762196	132762417	221	132762272	26	-384, 112, 66846	upstream, in gene, downstream
	ANKMY1, DUSP28, RNPEPL1	2	240565729	240566933	1204	240566000	99	-4932, 5946, -2541	upstream, downstream, upstream
	ANKMY1, DUSP28, RNPEPL1	2	240560191	240561149	958	240560960	70	108, 906, -7581	in gene, in gene, upstream
	ANKMY1, DUSP28, RNPEPL1	2	240567865	240568336	471	240568000	54	-6932, 7946, -541	upstream, downstream, upstream
	ANKMY2, BZW2	7	16645125	16646240	1115	16645728	58	89, -406	in gene, upstream
	ANKRD10	13	110914049	110915095	1046	110914912	35	195	in gene
	ANKRD10	13	110915236	110915454	218	110915296	17	-189	upstream
	ANKRD11	16	89409287	89409587	300	89409424	39	81150	in gene
	ANKRD11	16	89360927	89361358	431	89361168	23	129406	in gene
	ANKRD11, LOC100287036	16	89316142	89316399	257	89316224	17	174350, -4909	in gene, upstream
	ANKRD11, LOC101927817	16	89422924	89423235	311	89423040	54	67534, -7878	in gene, upstream
	ANKRD11, LOC101927817	16	89454118	89454321	203	89454256	18	36318, 23338	in gene, in gene
	ANKRD11, LOC101930112, LOC101927863	16	89490391	89491044	653	89490576	70	-2, -379, 15992	upstream, upstream, downstream
	ANKRD11, LOC101930112, LOC101927863	16	89489114	89489791	677	89489296	42	1278, -1659, 17272	in gene, upstream, downstream
	ANKRD11, LOC105371414	16	89309021	89309248	227	89309088	31	181486, 13003	in gene, downstream
	ANKRD13B, CORO6	17	29608904	29609107	203	29608960	34	15451, 13948	in gene, downstream
	ANKRD13B, CORO6	17	29615084	29615338	254	29615216	30	21707, 7692	downstream, in gene
	ANKRD13B, CORO6, SSH2	17	29617839	29618398	559	29618128	67	24619, 4780, 312111	downstream, in gene, downstream
	ANKRD13C, HHLA3, LOC102724548	1	70354194	70355089	895	70354864	71	-76, 67, 6143	upstream, in gene, downstream
	ANKRD13D, SSH3	11	67303785	67304027	242	67303840	20	14549, 392	downstream, in gene
	ANKRD16, FBXO18	10	5889451	5890284	833	5890016	31	-119, 444	upstream, in gene
	ANKRD17, LOC102724832	4	73258247	73259459	1212	73258560	82	582, -335	in gene, upstream
	ANKRD2, HOGA1, C10orf62	10	97590404	97590646	242	97590528	40	18087, 6183, 835	downstream, in gene, in gene
	ANKRD22	10	88835697	88835900	203	88835808	18	16167	in gene
	ANKRD26, YME1L1	10	27100056	27100418	362	27100192	26	306, 55086	in gene, downstream
	ANKRD27	19	32642836	32643181	345	32643008	47	32188	in gene
	ANKRD27, NUDT19, RGS9BP	19	32675661	32676719	1058	32676144	32	-948, 9848, 737	upstream, in gene, in gene
	ANKRD27, NUDT19, RGS9BP	19	32674499	32675136	637	32674688	30	508, 8392, -719	in gene, in gene, upstream
	ANKRD28	3	15859068	15860047	979	15859808	45	-253	upstream
	ANKRD29	18	23662362	23662641	279	23662528	36	364	in gene
	ANKRD31	5	75236806	75237158	352	75236992	33	-105	upstream
	ANKRD36	2	97113056	97113356	300	97113216	19	30	in gene
	ANKRD39, SEMA4C	2	96857653	96857952	299	96857792	15	227, 13151	in gene, downstream
	ANKRD40	17	50707288	50707568	280	50707392	21	517	in gene
	ANKRD44, ANKRD44-IT1, LOC105373824	2	197310602	197310936	334	197310752	56	45, -8233, -293	in gene, upstream, upstream
	ANKRD44, ANKRD44-IT1, LOC105373824	2	197309946	197310260	314	197310144	18	653, -7625, -901	in gene, upstream, upstream
	ANKRD44, LOC101927596	2	197198907	197199244	337	197199072	45	111725, 1138	in gene, in gene
	ANKRD46	8	100559220	100559927	707	100559488	113	298	in gene
	ANKRD50	4	124712409	124712632	223	124712480	22	740	in gene
	ANKRD52, COQ10A	12	56258034	56258658	624	56258304	37	55, -8554	in gene, upstream
	ANKRD52, COQ10A, CS	12	56267193	56267389	196	56267296	24	-8937, 438, 33095	upstream, in gene, downstream
	ANKRD52, COQ10A, CS	12	56266702	56267075	373	56266784	22	-8425, -74, 33607	upstream, upstream, downstream
	ANKRD54, MIR658, MIR659, EIF3L	22	37844012	37844533	521	37844352	23	4269, 19, 3422, -4096	in gene, in gene, downstream, upstream
	ANKRD6	6	89433121	89433589	468	89433360	28	182	in gene
	ANKRD6, LYRM2, LOC101929057, MDN1	6	89638557	89638857	300	89638720	20	205542, 35, 188, 189241	downstream, in gene, in gene, downstream
	ANKRD60	20	58209836	58210222	386	58209984	31	18669	downstream
	ANKRD65, LOC105378585, TMEM88B, LOC102724312, VWA1	1	1430419	1430630	211	1430496	14	-8676, 10251, 4368, 4077, -5027	upstream, downstream, downstream, in gene, upstream
	ANKS3, C16orf71	16	4733903	4734669	766	4734208	25	169, -80	in gene, upstream
	ANKS6	9	98795984	98796342	358	98796160	35	371	in gene
	ANKS6	9	98796586	98796872	286	98796704	21	-173	upstream
	ANKZF1, GLB1L, STK16, TUBA4A	2	219245263	219245786	523	219245440	54	15683, -11, -29, 9168	downstream, upstream, upstream, downstream
	ANO10	3	43621669	43622463	794	43622304	27	69290	in gene
	ANO10, ABHD5	3	43690772	43691468	696	43691104	21	490, 221	in gene, in gene
	ANO8, GTPBP3	19	17334066	17334524	458	17334144	22	690, -838	in gene, upstream
	ANO9, LOC105376506	11	428383	428579	196	428480	16	13531, -3628	in gene, upstream
	ANO9, LOC105376506, PTDSS2	11	449807	451170	1363	450112	77	-8101, 18004, 1841	upstream, downstream, in gene
	ANO9, LOC105376506, PTDSS2	11	447987	448196	209	448064	22	-6053, 15956, -207	upstream, downstream, upstream
	ANO9, LOC105376506, PTDSS2	11	448374	448580	206	448480	15	-6469, 16372, 209	upstream, downstream, in gene
	ANP32A	15	68817724	68818300	576	68818016	23	2906	in gene
	ANP32A, MIR4312	15	68791737	68791972	235	68791872	15	29050, 10053	in gene, downstream
	ANP32A, MIR4312, ANP32A-IT1	15	68795441	68795641	200	68795536	19	25386, 6389, 11565	in gene, downstream, downstream
	ANP32B, LOC105376172, LOC101928408	9	97984108	97985465	1357	97984928	53	1721, -199, 3573	in gene, upstream, downstream
	ANP32B, LOC105376172, LOC101928408	9	97982976	97983959	983	97983792	27	585, -1335, 4709	in gene, upstream, downstream
	ANP32E	1	150234657	150235371	714	150234784	30	1372	in gene
	ANPEP, LOC105370965	15	89814437	89814665	228	89814560	15	294, -6889	in gene, upstream
	ANTXR2	4	80072488	80072698	210	80072544	12	928	in gene
	ANXA11, LINC00857	10	80204933	80205791	858	80205360	30	317, -2350	in gene, upstream
	ANXA4, GMCL1	2	69829497	69830489	992	69829760	68	185660, 118	downstream, in gene
	ANXA5	4	121706748	121706984	236	121706896	18	-9904	upstream
	ANXA5	4	121697180	121697376	196	121697264	13	-272	upstream
	ANXA6	5	151139021	151139466	445	151139264	24	18618	in gene
	ANXA6	5	151157285	151157922	637	151157760	23	122	in gene
	ANXA7, MSS51	10	73413824	73414028	204	73413824	21	259, 19737	in gene, downstream
	AP1B1, LOC105377195, LOC105372987	22	29388250	29388666	416	29388544	21	39, 28578, 14370	in gene, in gene, downstream
	AP1G1	16	71808369	71809167	798	71808928	75	145	in gene
	AP1S2	X	15854196	15855194	998	15854976	57	38	in gene
	AP1S3	2	223760893	223761478	585	223761024	27	76578	in gene
	AP1S3	2	223837782	223837981	199	223837856	18	-254	upstream
	AP2A2	11	925548	926139	591	925952	85	143	in gene
	AP2A2	11	970408	970732	324	970576	31	44767	in gene
	AP2A2	11	996695	997017	322	996832	26	71023	in gene
	AP2S1	19	46860317	46860823	506	46860608	31	-9613	upstream
	AP3B1	5	78294677	78294897	220	78294784	19	-29	upstream
	AP3D1	19	2150727	2151378	651	2151200	26	420	in gene
	AP3M2	8	42152386	42153653	1267	42152592	39	-354	upstream
	AP4B1-AS1, AP4B1, DCLRE1B	1	113904754	113905648	894	113904992	52	92380, 214, -301	downstream, in gene, upstream
	AP4B1-AS1, PTPN22, BCL2L15	1	113871639	113871904	265	113871776	33	59164, -19, 15771	in gene, upstream, downstream
	AP4E1	15	50907877	50908452	575	50908256	29	-369	upstream
	AP4E1	15	50908537	50909085	548	50908848	24	223	in gene
	AP5B1, OVOL1, OVOL1-AS1	11	65780044	65780961	917	65780256	42	335, -6778, 10612	in gene, upstream, downstream
	AP5B1, OVOL1, OVOL1-AS1	11	65781364	65781668	304	65781504	25	-913, -5530, 9364	upstream, upstream, downstream
	AP5B1, OVOL1, OVOL1-AS1	11	65781792	65781988	196	65781856	16	-1265, -5178, 9012	upstream, upstream, downstream
	APBA1	9	69671830	69672065	235	69671920	14	1697	in gene
	APBA2	15	28955163	28955369	206	28955264	21	69270	in gene
	APBA2	15	28886112	28886308	196	28886192	20	198	in gene
	APBA3, LOC105372248, MRPL54, RAX2	19	3762582	3763023	441	3762720	30	-1022, -80, 53, 9501	upstream, upstream, in gene, downstream
	APBA3, LOC105372248, MRPL54, RAX2	19	3761538	3761829	291	3761685	16	13, 955, -982, 10536	in gene, downstream, upstream, downstream
	APBB1	11	6418785	6419499	714	6419312	29	160	in gene
	APBB1IP	10	26448808	26449004	196	26448832	16	10629	in gene
	APBB1IP	10	26433046	26433249	203	26433168	13	-5035	upstream
	APC	5	112737651	112737847	196	112737760	19	30255	in gene
	API5	11	43311811	43312395	584	43312064	74	109	in gene
	APIP, PDHX	11	34916063	34916391	328	34916192	26	219, 363	in gene, in gene
	APLP2	11	130069304	130070418	1114	130069792	45	-29	upstream
	APMAP	20	24992256	24993066	810	24992736	76	238	in gene
	APOBEC2, OARD1, NFYA	6	41072234	41072811	577	41072544	56	19343, -95, -424	downstream, upstream, upstream
	APOBEC2, OARD1, NFYA	6	41073398	41073907	509	41073568	30	20367, -1119, 600	downstream, upstream, in gene
	APOBEC3B-AS1	22	39003231	39003471	240	39003392	25	-5172	upstream
	APOBEC3G, LOC101927202	22	39080537	39080770	233	39080672	19	3667, -10059	in gene, upstream
	APOBEC3G, LOC101927202, APOBEC3H	22	39090529	39091037	508	39090720	99	13715, -11, -6503	downstream, upstream, upstream
	APOC4-APOC2, APOC4, APOC2, LOC105372418, CLPTM1	19	44954988	44955468	480	44955136	23	12898, 12898, 9154, -4166, 551	downstream, downstream, downstream, upstream, in gene
	APOL3	22	36161990	36162605	615	36162368	43	3809	in gene
	APOLD1	12	12786940	12787136	196	12787040	15	61123	in gene
	APOO, CXorf58	X	23907527	23907984	457	23907840	34	100, -92	in gene, upstream
	APPBP2	17	60525766	60526029	263	60525824	17	416	in gene
	APPL2	12	105236153	105236394	241	105236272	37	-42	upstream
	APPL2	12	105235827	105236057	230	105235904	28	326	in gene
	APTR, RSBN1L	7	77696542	77696788	246	77696704	22	641, 278	in gene, in gene
	APTX, DNAJA1	9	33025146	33025899	753	33025280	32	-142, 69	upstream, in gene
	AQP10, ATP8B2	1	154328520	154328861	341	154328640	16	7573, 3080	downstream, in gene
	ARAF	X	47561332	47561581	249	47561392	18	292	in gene
	ARAP1	11	72738640	72738971	331	72738752	58	13637	in gene
	ARAP1	11	72741486	72741819	333	72741600	36	10789	in gene
	ARAP1	11	72736864	72737093	229	72737024	27	15365	in gene
	ARAP1, STARD10	11	72752202	72752579	377	72752288	38	101, 41417	in gene, downstream
	ARAP2, LOC439933	4	36244164	36244777	613	36244608	55	-251, 492	upstream, in gene
	ARAP2, LOC439933	4	36238027	36238340	313	36238176	39	6181, -5940	in gene, upstream
	ARCN1, PHLDB1	11	118608224	118608720	496	118608576	23	36189, 2137	downstream, in gene
	ARCN1, PHLDB1	11	118609602	118609816	214	118609664	16	37277, 3225	downstream, in gene
	ARCN1, PHLDB1	11	118610935	118611131	196	118610992	14	38605, 4553	downstream, in gene
	AREG	4	74444964	74445246	282	74445056	20	-42	upstream
	ARF1, MIR3620, C1orf35, MRPL55	1	228102933	228103378	445	228103152	30	20492, 5889, 2259, 7801	downstream, downstream, in gene, downstream
	ARF1, MIR3620, C1orf35, MRPL55	1	228102073	228102417	344	228102208	21	19548, 4945, 3203, 8745	downstream, downstream, in gene, downstream
	ARF3, WNT10B	12	48957300	48957546	246	48957376	20	150, 14482	in gene, downstream
	ARF6	14	49892679	49894196	1517	49893600	82	582	in gene
	ARFGAP2, PACSIN3, MIR6745	11	47176516	47177468	952	47177056	83	447, 9403, 2681	in gene, downstream, downstream
	ARFGAP2, PACSIN3, MIR6745	11	47186087	47186296	209	47186240	15	-8737, 219, -6503	upstream, in gene, upstream
	ARFGEF1, LOC102724708	8	67343220	67343865	645	67343680	34	217, 33	in gene, in gene
	ARFGEF2, CSE1L-AS1, CSE1L	20	49046471	49046896	425	49046688	26	124967, -632, 442	downstream, upstream, in gene
	ARGLU1, LOC105370348	13	106567578	106568204	626	106567904	35	262, -347	in gene, upstream
	ARHGAP1, ZNF408	11	46700473	46700937	464	46700640	38	25, -127	in gene, upstream
	ARHGAP10	4	147799931	147800159	228	147800064	28	68001	in gene
	ARHGAP10	4	147846435	147846634	199	147846560	18	114497	in gene
	ARHGAP12	10	31928283	31929136	853	31928752	35	124	in gene
	ARHGAP12	10	31927889	31928132	243	31927936	16	940	in gene
	ARHGAP22, LOC105378297	10	48518083	48518290	207	48518176	22	138089, 6491	in gene, in gene
	ARHGAP23	17	38428629	38428830	201	38428704	19	9418	in gene
	ARHGAP25	2	68721898	68722139	241	68722016	27	11511	in gene
	ARHGAP25, LOC105374790	2	68766494	68766705	211	68766592	22	56087, -3579	in gene, upstream
	ARHGAP26	5	142929653	142929849	196	142929696	22	159316	in gene
	ARHGAP26	5	143121211	143121411	200	143121280	18	350900	in gene
	ARHGAP26	5	143002803	143003046	243	143002896	16	232516	in gene
	ARHGAP29	1	94237225	94237726	501	94237504	49	37564	in gene
	ARHGAP29	1	94247538	94247908	370	94247680	39	27388	in gene
	ARHGAP30, PVRL4	1	161069736	161070147	411	161069984	46	-13, 19611	upstream, downstream
	ARHGAP31	3	119293756	119294879	1123	119294048	175	-241	upstream
	ARHGAP31, ARHGAP31-AS1	3	119322990	119323593	603	119323168	84	28879, -408	in gene, upstream
	ARHGAP35	19	46978319	46978590	271	46978432	20	59865	in gene
	ARHGAP39	8	144687499	144688360	861	144688032	36	12488	in gene
	ARHGAP39	8	144685934	144686413	479	144686096	27	14424	in gene
	ARHGAP39	8	144686577	144687219	642	144686656	27	13864	in gene
	ARHGAP39	8	144675401	144675659	258	144675456	24	25064	in gene
	ARHGAP4, NAA10, RENBP	X	153926881	153927161	280	153926944	19	-684, 8210, 17836	upstream, downstream, downstream
	ARHGAP4, NAA10, RENBP	X	153928025	153928487	462	153928144	16	-1884, 7010, 16636	upstream, downstream, downstream
	ARHGAP5-AS1, ARHGAP5	14	32077263	32077584	321	32077376	25	-677, 918	upstream, in gene
	ARHGDIA	17	81871319	81872197	878	81871552	45	-146	upstream
	ARHGEF10	8	1860113	1860438	325	1860240	45	36257	in gene
	ARHGEF12	11	120344436	120344681	245	120344576	23	8170	in gene
	ARHGEF17, RELT	11	73376148	73377303	1155	73376848	62	70909, 488	downstream, in gene
	ARHGEF18	19	7395103	7395299	196	7395189	14	46278	in gene
	ARHGEF19, ANO7P1	1	16206759	16207226	467	16207008	28	5663, 20028	in gene, downstream
	ARHGEF28	5	73625860	73626355	495	73626256	17	98	in gene
	ARHGEF3	3	56725287	56725553	266	56725376	35	353932	downstream
	ARHGEF3	3	56783871	56784128	257	56783968	27	295340	in gene
	ARHGEF7	13	111189258	111189466	208	111189328	23	74051	in gene
	ARHGEF7, ARHGEF7-AS1, LOC101060553	13	111153304	111154317	1013	111153760	44	38483, -5195, -183	in gene, upstream, upstream
	ARHGEF9	X	63754859	63755358	499	63755168	32	30378	in gene
	ARID1A, PIGV	1	26786979	26788020	1041	26787584	49	91553, -379	downstream, upstream
	ARID1B	6	157021109	157022029	920	157021664	88	243772	in gene
	ARID3A	19	932550	933757	1207	933024	90	6987	in gene
	ARID3A	19	940701	941322	621	940960	63	14923	in gene
	ARID3B	15	74540853	74541122	269	74540992	26	-185	upstream
	ARID3B	15	74541329	74541580	251	74541536	12	359	in gene
	ARID3C, SIGMAR1, GALT	9	34637614	34638019	405	34637824	33	-8874, 2, -8765	upstream, in gene, upstream
	ARID4B	1	235297623	235297876	253	235297728	30	30570	in gene
	ARID4B, GGPS1	1	235327308	235328060	752	235327595	32	703, -843	in gene, upstream
	ARID4B, GGPS1	1	235328558	235328793	235	235328672	20	-374, 234	upstream, in gene
	ARID5A	2	96546300	96546557	257	96546384	33	9657	in gene
	ARID5B	10	61903273	61903686	413	61903456	47	2202	in gene
	ARIH2, LOC105377080, LOC105377079, P4HTM, LOC101928814	3	48990290	48990970	680	48990808	23	71987, -7874, -3725, 1708, -5777	downstream, upstream, upstream, in gene, upstream
	ARIH2OS, ARIH2	3	48918307	48919467	1160	48918496	54	889, -325	in gene, upstream
	ARL10, CLTB	5	176416041	176416821	780	176416592	38	51118, -23	downstream, upstream
	ARL15, LINC01033	5	54310487	54311129	642	54310672	21	-86, -10272	upstream, upstream
	ARL16, HGS, MIR6786	17	81683946	81684276	330	81684096	21	-172, 164, -9661	upstream, in gene, upstream
	ARL2-SNX15, ARL2, MIR6879	11	65013874	65014530	656	65014216	31	103, 103, -4289	in gene, in gene, upstream
	ARL2-SNX15, ARL2, MIR6879, SNX15	11	65027332	65027824	492	65027584	37	13471, 13471, 9079, 176	in gene, downstream, downstream, in gene
	ARL2-SNX15, SNX15, SAC3D1, NAALADL1	11	65040872	65041737	865	65041200	24	27087, 13792, 296, 17821	downstream, downstream, in gene, downstream
	ARL4A	7	12686476	12687366	890	12686624	44	-203	upstream
	ARL4C	2	234496464	234497106	642	234496912	65	141	in gene
	ARL4C	2	234483677	234484254	577	234484032	36	13021	downstream
	ARL4C	2	234497359	234497861	502	234497728	21	-675	upstream
	ARL4D	17	43398909	43399153	244	43399008	22	23	in gene
	ARL5A, CACNB4	2	151828248	151828712	464	151828512	39	-17, 271476	upstream, downstream
	ARL6IP1, SMG1	16	18801162	18802006	844	18801568	86	-33, 124841	upstream, downstream
	ARL8B	3	5122105	5122685	580	5122272	21	27	in gene
	ARL8B, LOC105376935, EDEM1	3	5187525	5188456	931	5187776	32	65531, -400, 102	downstream, upstream, in gene
	ARMC2	6	108848343	108848804	461	108848576	54	162	in gene
	ARMC2, ARMC2-AS1	6	108904806	108905034	228	108904928	17	56514, 19175	in gene, downstream
	ARMC5	16	31458025	31459933	1908	31458528	87	255	in gene
	ARMC5, TGFB1I1, SLC5A2	16	31472420	31472625	205	31472592	12	14319, 437, -9943	downstream, in gene, upstream
	ARMC6, LOC105372301, SLC25A42	19	19063429	19063703	274	19063536	23	29958, -25, -430	downstream, upstream, upstream
	ARMC7, NT5C, HN1	17	75131135	75132133	998	75131696	31	21744, 99, 22987	downstream, in gene, downstream
	ARMC9	2	231383591	231383978	387	231383776	47	185230	in gene
	ARMC9	2	231198405	231198751	346	231198560	39	14	in gene
	ARMC9, B3GNT7, LOC105373926	2	231393574	231393899	325	231393792	21	195246, -1832, -7821	in gene, upstream, upstream
	ARNT	1	150876465	150876848	383	150876640	56	128	in gene
	ARNT	1	150876144	150876383	239	150876224	25	544	in gene
	ARPC1A, ARPC1B	7	99374274	99374824	550	99374624	37	48751, -51	downstream, upstream
	ARPC1A, ARPC1B	7	99375031	99375543	512	99375216	17	49343, 541	downstream, in gene
	ARPC1B, PDAP1	7	99392897	99393246	349	99393088	22	18413, 15594	in gene, downstream
	ARPC3, GPN3	12	110450033	110450523	490	110450336	23	75, 18385	in gene, downstream
	ARPC4, ARPC4-TTLL3, TTLL3	3	9809933	9810227	294	9810048	24	17553, 17500, 88	downstream, in gene, in gene
	ARPP19	15	52568494	52568820	326	52568672	21	549	in gene
	ARRB1	11	75351805	75352543	738	75351968	47	-137	upstream
	ARRB1	11	75351216	75351664	448	75351392	36	439	in gene
	ARRB2, LOC105371500	17	4717770	4717981	211	4717856	29	7362, -2876	in gene, upstream
	ARRDC1, ARRDC1-AS1	9	137605718	137606401	683	137606064	20	424, 12831	in gene, downstream
	ARRDC1, ARRDC1-AS1, EHMT1	9	137618434	137618867	433	137618688	29	13048, 207, -304	downstream, in gene, upstream
	ARRDC1, ARRDC1-AS1, EHMT1	9	137617915	137618240	325	137618080	16	12440, 815, -912	downstream, in gene, upstream
	ARRDC3, ARRDC3-AS1	5	91379976	91380268	292	91380117	16	3242, -230	in gene, upstream
	ARRDC3, ARRDC3-AS1	5	91380789	91381017	228	91380896	13	2463, 549	in gene, in gene
	ARRDC4	15	97960666	97960917	251	97960736	20	33	in gene
	ARRDC5, UHRF1	19	4916454	4916672	218	4916640	23	180, 13560	in gene, in gene
	ARRDC5, UHRF1	19	4909600	4909803	203	4909728	16	7092, 6648	in gene, in gene
	ARSA	22	50628209	50629138	929	50628880	98	-707	upstream
	ARSB	5	78984627	78984918	291	78984736	22	1798	in gene
	ARSB	5	78985017	78985316	299	78985120	21	1414	in gene
	ARSG	17	68356552	68356756	204	68356672	28	99513	in gene
	ARSG, PRKAR1A, WIPI1, LOC105371872	17	68457592	68457794	202	68457744	22	200585, 44121, -232, -2816	downstream, in gene, upstream, upstream
	ARSG, SLC16A6	17	68291488	68292232	744	68291696	30	34537, -432	in gene, upstream
	ARSG, SLC16A6	17	68290376	68290801	425	68290528	28	33369, 736	in gene, in gene
	ARVCF, TANGO2	22	20020864	20021348	484	20021056	54	-4254, 4056	upstream, in gene
	ASAH1, LOC101929066	8	18083805	18084307	502	18083936	19	1062, -932	in gene, upstream
	ASAP1	8	130444717	130444913	196	130444768	20	-1108	upstream
	ASAP1	8	130247691	130247910	219	130247808	19	195852	in gene
	ASAP1	8	130358779	130359054	275	130358880	16	84780	in gene
	ASB1	2	238426469	238427590	1121	238426912	130	171	in gene
	ASB13	10	5666195	5666424	229	5666240	14	355	in gene
	ASB2	14	93978336	93978568	232	93978432	25	-1646	upstream
	ASB2	14	93962905	93963123	218	93962944	17	13842	in gene
	ASB3, GPR75-ASB3, CHAC2	2	53767830	53768069	239	53767904	20	19105, 92129, 112	in gene, in gene, in gene
	ASB8	12	48157075	48157301	226	48157136	19	458	in gene
	ASCC1, ANAPC16	10	72215935	72216186	251	72216064	29	1070, 64	in gene, in gene
	ASCC2	22	29837987	29838372	385	29838176	40	128	in gene
	ASCL2	11	2269953	2270272	319	2270112	20	840	in gene
	ASCL2	11	2270927	2271138	211	2271072	19	-120	upstream
	ASCL2	11	2268910	2269326	416	2269200	17	1752	in gene
	ASF1B, LOC100507373	19	14136392	14137422	1030	14136864	39	-236, -288	upstream, upstream
	ASH1L, ASH1L-AS1	1	155562283	155563292	1009	155563072	67	-222, 1091	upstream, in gene
	ASH2L	8	38105157	38105487	330	38105344	36	379	in gene
	ASH2L	8	38105608	38105931	323	38105744	23	779	in gene
	ASIC3, CDK5, SLC4A2	7	151058033	151058835	802	151058368	58	10076, -403, 156	downstream, upstream, in gene
	ASIC3, CDK5, SLC4A2	7	151059867	151060190	323	151060032	19	11740, -2067, 1820	downstream, upstream, in gene
	ASIC3, CDK5, SLC4A2	7	151058999	151059254	255	151059168	17	10876, -1203, 956	downstream, upstream, in gene
	ASIC4, CHPF, TMEM198, MIR3132, OBSL1	2	219543694	219543937	243	219543787	20	29617, -22, 124, 5360, 27790	downstream, upstream, in gene, downstream, downstream
	ASL	7	66075542	66076304	762	66075861	30	72	in gene
	ASNS	7	97871881	97872589	708	97872224	66	318	in gene
	ASNSD1	2	189661160	189661461	301	189661296	20	-103	upstream
	ASNSD1, LOC105373793, ANKAR	2	189674416	189674892	476	189674560	36	13161, 266, 268	downstream, in gene, in gene
	ASPH, MIR4470	8	61714024	61714733	709	61714560	19	80, -228	in gene, upstream
	ASPHD1, KCTD13	16	29926222	29926678	456	29926368	27	25542, -136	downstream, upstream
	ASPSCR1, STRA13, LRRC45, RAC3	17	82022663	82022998	335	82022800	33	45250, 130, -450, -8856	downstream, in gene, upstream, upstream
	ASRGL1	11	62337374	62337672	298	62337472	17	170	in gene
	ASTE1, NEK11	3	131026785	131027117	332	131026944	53	-90, 94	upstream, in gene
	ASTL, DUSP2	2	96146195	96146642	447	96146432	41	-3355, -992	upstream, upstream
	ASTL, DUSP2	2	96145244	96145564	320	96145344	23	-2267, 96	upstream, in gene
	ASXL1, LOC105372590	20	32358084	32358572	488	32358400	32	56, 35126	in gene, downstream
	ASXL2	2	25877794	25878745	951	25878560	72	-86	upstream
	ATAD1	10	87817965	87818226	261	87818192	19	23157	in gene
	ATAD2, LOC105375737	8	123395815	123396853	1038	123396160	35	305, 20263	in gene, downstream
	ATAD2B, UBXN2A	2	23926184	23927579	1395	23927168	90	-54, -103	upstream, upstream
	ATAD3B, ATAD3A	1	1511519	1512263	744	1511936	40	40204, -207	downstream, upstream
	ATAT1, C6orf136, DHX16	6	30647502	30647810	308	30647584	20	20748, 545, 25469	downstream, in gene, downstream
	ATE1, ATE1-AS1	10	121927754	121928703	949	121928352	32	449, 40	in gene, in gene
	ATF2, LOC105373751, MIR933, ATP5G3	2	175167626	175167946	320	175167792	13	414, 1325, -83, 13970	in gene, in gene, upstream, downstream
	ATF3	1	212607941	212608550	609	212608096	37	42762	in gene
	ATF3	1	212607445	212607722	277	212607616	20	42282	in gene
	ATF3	1	212608722	212609055	333	212608896	20	43562	in gene
	ATF7IP	12	14365561	14366093	532	14365792	92	160	in gene
	ATF7IP2	16	10385892	10386468	576	10386080	32	25	in gene
	ATG10	5	81972086	81972441	355	81972240	21	215	in gene
	ATG12, AP3S1	5	115841774	115842486	712	115842304	25	-453, 382	upstream, in gene
	ATG16L1	2	233251493	233251712	219	233251616	19	45	in gene
	ATG16L1	2	233251850	233252062	212	233251936	18	365	in gene
	ATG16L1, SCARNA5	2	233267946	233268362	416	233268096	27	16525, -7630	in gene, upstream
	ATG2A, PPP2R5B	11	64916403	64916599	196	64916544	19	706, -1009	in gene, upstream
	ATG2A, PPP2R5B, GPHA2	11	64924372	64924860	488	64924640	22	-7390, 7087, 13492	upstream, in gene, downstream
	ATG2B, GSKIP	14	96363001	96363296	295	96363147	15	194, -305	in gene, upstream
	ATG3, SLC35A5	3	112561656	112562355	699	112562208	33	-245, 499	upstream, in gene
	ATG4C	1	62783869	62784326	457	62784064	62	-42	upstream
	ATG4D, MIR1238, KRI1	19	10553790	10554332	542	10554112	41	10218, 1990, 11919	downstream, downstream, in gene
	ATG4D, MIR1238, KRI1	19	10543772	10544287	515	10544032	27	138, -8090, 21999	in gene, upstream, downstream
	ATG5	6	106325594	106325892	298	106325696	35	124	in gene
	ATL2	2	38376612	38377536	924	38377168	64	971	in gene
	ATL3	11	63671052	63671280	228	63671168	20	806	in gene
	ATL3, RTN3	11	63671425	63671874	449	63671552	26	422, -9808	in gene, upstream
	ATN1, C12orf57, RNU7-1, PTPN6	12	6943940	6944262	322	6944112	24	19649, 674, 296, -2464	downstream, in gene, downstream, upstream
	ATOX1, LOC105378235	5	151758337	151758818	481	151758624	34	25, 6124	in gene, downstream
	ATP10A	15	25811592	25811807	215	25811712	23	53446	in gene
	ATP10D	4	47531717	47531943	226	47531872	18	46601	in gene
	ATP11C, MIR505	X	139932318	139932738	420	139932384	17	12850, -8153	in gene, upstream
	ATP12A	13	24680485	24680717	232	24680640	21	229	in gene
	ATP12A	13	24684521	24684913	392	24684656	14	4245	in gene
	ATP13A1, ZNF101	19	19668108	19669458	1350	19668352	80	-529, 199	upstream, in gene
	ATP13A1, ZNF101	19	19663379	19663956	577	19663552	35	4271, -4601	in gene, upstream
	ATP13A3, LINC00884	3	194486721	194487187	466	194486912	36	-258, -228	upstream, upstream
	ATP13A3, LINC00884	3	194486231	194486508	277	194486352	20	302, -788	in gene, upstream
	ATP13A3, LINC00884	3	194487506	194487769	263	194487616	19	-962, 476	upstream, in gene
	ATP1A1	1	116372713	116373413	700	116372896	22	711	in gene
	ATP1A1-AS1, LOC105378921, LOC101929023	1	116418578	116418856	278	116418688	25	-66, 11486, 60138	upstream, downstream, downstream
	ATP1A3, GRIK5	19	41993776	41994462	686	41993952	73	324, 77852	in gene, downstream
	ATP1B3	3	141876614	141877047	433	141876736	23	108	in gene
	ATP2A2	12	110280667	110282072	1405	110281296	40	69	in gene
	ATP2B1, LINC00936	12	89708021	89710170	2149	89709296	44	57, 341	in gene, in gene
	ATP2B4	1	203626513	203626751	238	203626688	17	-99	upstream
	ATP2C1, LOC105374109	3	130893940	130894420	480	130894016	20	43533, 21040	in gene, downstream
	ATP5A1, TRK-CTT6-1, HAUS1	18	46097846	46098631	785	46098208	33	6025, -8831, -6124	in gene, upstream, upstream
	ATP5D, LOC102723811, MIDN, LOC105372236	19	1253717	1254435	718	1254240	25	12490, -5736, 5687, 10362	downstream, upstream, in gene, downstream
	ATP5G2	12	53676175	53676413	238	53676256	21	472	in gene
	ATP5G2	12	53675819	53676046	227	53675952	19	776	in gene
	ATP5G2	12	53677221	53677425	204	53677312	15	-584	upstream
	ATP5I, MYL5, MFSD7	4	681135	681528	393	681344	43	-7006, 7132, 8124	upstream, in gene, in gene
	ATP5J, GABPA, LOC105372755	21	25735232	25735677	445	25735456	31	198, 509, 19328	in gene, in gene, downstream
	ATP5J2-PTCD1, PTCD1, CPSF4	7	99438818	99439224	406	99439008	24	27193, -169, 68	in gene, upstream, in gene
	ATP5O	21	33915622	33915826	204	33915744	19	110	in gene
	ATP6AP2	X	40580892	40581303	411	40581040	23	76	in gene
	ATP6V0A1	17	42484353	42484695	342	42484512	50	25668	in gene
	ATP6V0A1	17	42456791	42457055	264	42456928	21	-1916	upstream
	ATP6V0A1, NAGLU	17	42531938	42532237	299	42532032	18	73188, -3901	downstream, upstream
	ATP6V0A2	12	123750204	123750484	280	123750336	59	38018	in gene
	ATP6V0A2	12	123742243	123742479	236	123742320	19	30002	in gene
	ATP6V0A2, DNAH10, LOC105370044	12	123754078	123754274	196	123754176	26	41858, -6957, 36751	in gene, upstream, downstream
	ATP6V0A2, DNAH10, LOC105370044	12	123767673	123767911	238	123767760	25	55442, 6627, 23167	downstream, in gene, in gene
	ATP6V0A2, DNAH10, LOC105370044	12	123762252	123762460	208	123762336	17	50018, 1203, 28591	downstream, in gene, downstream
	ATP6V0C, AMDHD2, CEMP1	16	2520744	2521083	339	2520896	32	7170, 534, 10512	downstream, in gene, downstream
	ATP6V0D1, LOC101927837, AGRP	16	67481175	67481462	287	67481328	30	-142, 8, 2755	upstream, in gene, downstream
	ATP6V1D, EIF2S1	14	67359821	67360305	484	67359920	17	83, -397	in gene, upstream
	ATP6V1E1, BCL2L13	22	17638763	17639225	462	17638848	27	-10026, 9993	upstream, in gene
	ATP6V1E1, BCL2L13	22	17628439	17628738	299	17628544	16	278, -311	in gene, upstream
	ATP6V1E2, RHOQ	2	46542098	46542518	420	46542256	23	156, -472	in gene, upstream
	ATP6V1G1	9	114587675	114588042	367	114587968	17	254	in gene
	ATP6V1G2-DDX39B, DDX39B, SNORD117, SNORD84, ATP6V1G2, NFKBIL1, LOC100287329	6	31541795	31542241	446	31542080	20	4768, 395, -5631, -902, 4768, -4771, 30618	in gene, in gene, upstream, upstream, downstream, upstream, downstream
	ATP7B, ALG11	13	52011902	52012141	239	52012032	20	67, -355	in gene, upstream
	ATP8A1	4	42656609	42657195	586	42656992	75	113	in gene
	ATP8B2	1	154343002	154343278	276	154343104	29	17544	in gene
	ATP9B	18	79068696	79069792	1096	79069504	103	21910	in gene
	ATP9B	18	79326977	79328284	1307	79327424	69	279830	in gene
	ATP9B	18	79326642	79326860	218	79326752	20	279158	in gene
	ATPAF1, TEX38, EFCAB14-AS1, EFCAB14	1	46668166	46668399	233	46668288	16	139, -1058, -5748, 50776	in gene, upstream, upstream, downstream
	ATPAF2, GID4	17	18039034	18039266	232	18039200	21	-31, -97	upstream, upstream
	ATPIF1, LOC105376896, LOC105376895	1	28247310	28247693	383	28247488	38	11397, -164, -6112	downstream, upstream, upstream
	ATR	3	142578357	142578900	543	142578752	29	74	in gene
	ATRN	20	3470802	3471572	770	3471264	58	246	in gene
	ATRX	X	77785877	77786252	375	77786112	26	157	in gene
	ATXN1, LOC101928433	6	16760047	16760799	752	16760544	27	946, 486	in gene, in gene
	ATXN1, LOC101928433	6	16761662	16762005	343	16761808	21	-318, 1750	upstream, in gene
	ATXN10	22	45671707	45672237	530	45671872	18	74	in gene
	ATXN1L	16	71845877	71846149	272	71846016	20	25	in gene
	ATXN2, LOC102723619	12	111599483	111599800	317	111599616	33	60, 118	in gene, in gene
	ATXN2, LOC102723619	12	111598346	111598554	208	111598368	17	1308, -1130	in gene, upstream
	ATXN2, LOC102723619	12	111598769	111599236	467	111598928	16	748, -570	in gene, upstream
	ATXN2L	16	28822552	28824627	2075	28824512	34	1464	in gene
	ATXN2L, LOC105371163, TUFM, MIR4721, SH2B1	16	28845971	28846634	663	28846304	31	23256, 8665, 207, -2297, -296	downstream, downstream, in gene, upstream, upstream
	ATXN7	3	63912011	63912637	626	63912448	50	47891	in gene
	ATXN7	3	63912725	63912945	220	63912848	18	48291	in gene
	ATXN7L1	7	105849200	105849408	208	105849344	18	27888	in gene
	AUH	9	91361528	91361979	451	91361808	19	131	in gene
	AUNIP, PAQR7	1	25859382	25859763	381	25859424	22	34, 17283	in gene, downstream
	AURKA, CSTF1	20	56392333	56392862	529	56392624	28	-329, 253	upstream, in gene
	AURKAIP1	1	1374902	1375692	790	1375232	70	206	in gene
	AURKAIP1	1	1374194	1374521	327	1374336	16	1102	in gene
	AURKC, ZNF805	19	57240459	57240829	370	57240624	31	10264, -61	downstream, upstream
	AUTS2	7	70660557	70660816	259	70660640	30	1062165	in gene
	AUTS2	7	70693675	70693928	253	70693760	22	1095285	in gene
	AUTS2	7	70695065	70695395	330	70695168	17	1096693	in gene
	AVEN, CHRM5	15	34018241	34018671	430	34018368	41	56090, 50123	in gene, in gene
	AVEN, CHRM5	15	34038968	34039261	293	34039120	22	35338, 70875	in gene, in gene
	AVP	20	3092701	3092897	196	3092752	14	769	in gene
	AVPI1	10	97687006	97687678	672	97687392	36	-134	upstream
	AVPR2, ARHGAP4	X	153906233	153906433	200	153906304	20	3773, 19956	in gene, downstream
	AXIN1	16	323894	325728	1834	325088	210	36409	in gene
	AXIN1	16	327183	327833	650	327520	197	33977	in gene
	AXIN1	16	307727	308177	450	307968	71	53529	in gene
	AXIN1	16	353117	353375	258	353248	17	8249	in gene
	AXIN1, MRPL28	16	360547	360743	196	360656	16	841, 9913	in gene, downstream
	AXIN2	17	65556609	65556844	235	65556720	22	4902	in gene
	AXL, LOC105372402, HNRNPUL1	19	41262274	41263882	1608	41263152	55	43953, 1130, 676	downstream, in gene, in gene
	AXL, LOC105372402, HNRNPUL1	19	41264178	41264938	760	41264320	33	45121, -38, 1844	downstream, upstream, in gene
	AXL, LOC105372402, HNRNPUL1	19	41265267	41265532	265	41265440	15	46241, -1158, 2964	downstream, upstream, in gene
	AZI2, ZCWPW2	3	28348625	28349114	489	28348736	23	688, -413	in gene, upstream
	AZIN1, AZIN1-AS1	8	102863133	102863558	425	102863264	39	936, -1007	in gene, upstream
	AZIN1, AZIN1-AS1	8	102863789	102864166	377	102863936	22	264, -335	in gene, upstream
	AZIN2	1	33099350	33099805	455	33099440	25	18330	in gene
	AZIN2, LOC105378636	1	33127201	33127761	560	33127520	26	46410, 13282	in gene, in gene
	B3GALNT1	3	161105185	161105459	274	161105296	24	334	in gene
	B3GALNT2	1	235503889	235504814	925	235504576	106	-95	upstream
	B3GALTL	13	31199665	31200197	532	31199824	35	-151	upstream
	B3GALTL	13	31200399	31200643	244	31200448	14	473	in gene
	B3GNT2, MIR5192	2	62195589	62195936	347	62195776	27	-351, -10050	upstream, upstream
	B3GNT2, MIR5192	2	62196314	62196524	210	62196416	18	289, -9410	in gene, upstream
	B3GNTL1	17	83054156	83054481	325	83054304	24	-2459	upstream
	B3GNTL1	17	83054561	83054757	196	83054720	20	-2875	upstream
	B3GNTL1	17	83051437	83051742	305	83051552	18	293	in gene
	B4GALNT3, NINJ2	12	563469	563698	229	563584	17	103207, 100157	downstream, downstream
	B4GALT1	9	33137725	33138150	425	33137888	20	29470	in gene
	B4GALT1, B4GALT1-AS1	9	33167418	33167847	429	33167584	58	-226, 636	upstream, in gene
	B4GALT1, B4GALT1-AS1	9	33167037	33167314	277	33167168	26	190, 220	in gene, in gene
	B4GALT4, B4GALT4-AS1	3	119240702	119240949	247	119240864	21	41, 14378	in gene, downstream
	B4GALT5	20	49714029	49714236	207	49714144	14	-260	upstream
	B4GALT6	18	31685181	31685830	649	31685312	34	39974	in gene
	B9D1, LOC105371573	17	19362388	19362587	199	19362432	16	15750, -288	in gene, upstream
	B9D1, LOC105371573, MAPK7	17	19370549	19371004	455	19370720	37	7462, 8000, -7001	in gene, downstream, upstream
	B9D1, LOC105371573, MAPK7, MFAP4	17	19377733	19378624	891	19377888	29	294, 15168, 167, 9331	in gene, downstream, in gene, downstream
	B9D1, LOC105371573, MAPK7, MFAP4	17	19378769	19379067	298	19378912	17	-730, 16192, 1191, 8307	upstream, downstream, in gene, downstream
	BAALC-AS2, BAALC	8	103140858	103141062	204	103140960	15	382, 267	in gene, in gene
	BACH2	6	90295089	90296313	1224	90295248	65	1660	in gene
	BACH2	6	90111054	90111347	293	90111168	52	185740	in gene
	BACH2	6	90274417	90274730	313	90274592	45	22316	in gene
	BACH2	6	90296420	90296951	531	90296736	43	172	in gene
	BAG1, CHMP5	9	33264151	33264869	718	33264672	31	89, -207	in gene, upstream
	BAG3	10	119651581	119651838	257	119651712	18	365	in gene
	BAG3	10	119652155	119652351	196	119652224	16	877	in gene
	BAG3	10	119651124	119651326	202	119651152	14	-195	upstream
	BAG5, APOPT1	14	103562258	103563193	935	103563008	38	-194, 51	upstream, in gene
	BAG6, APOM, C6orf47, GPANK1	6	31652385	31652982	597	31652576	40	8191, 166, 8196, 13707	in gene, in gene, downstream, downstream
	BAG6, APOM, C6orf47, GPANK1, CSNK2B, LY6G5B	6	31664941	31666222	1281	31665120	50	-4353, 12710, -4348, 1163, -760, -5831	upstream, downstream, upstream, in gene, upstream, upstream
	BAHCC1	17	81423935	81425041	1106	81424832	67	29368	in gene
	BAHCC1	17	81425626	81426990	1364	81425824	47	30360	in gene
	BAHCC1	17	81412867	81413099	232	81412960	36	17496	in gene
	BAHCC1	17	81428306	81428583	277	81428384	24	32920	in gene
	BAHCC1, MIR3186, LOC105371926	17	81460611	81461800	1189	81460928	45	65464, -9740, -5668	in gene, upstream, upstream
	BAHCC1, MIR3186, LOC105371926	17	81456065	81456630	565	81456256	28	60792, -5068, -996	in gene, upstream, upstream
	BAHCC1, MIR3186, LOC105371926	17	81455469	81455874	405	81455616	23	60152, -4428, -356	in gene, upstream, upstream
	BAHCC1, MIR4740	17	81399819	81400118	299	81399936	30	4472, 842	in gene, downstream
	BAHCC1, MIR4740	17	81397423	81397754	331	81397552	20	2088, 3226	in gene, downstream
	BAHCC1, MIR4740	17	81398530	81398790	260	81398656	13	3192, 2122	in gene, downstream
	BAHD1, CHST14	15	40471217	40471815	598	40471392	47	31671, 431	downstream, in gene
	BAIAP2	17	81094768	81094984	216	81094880	32	59736	in gene
	BAIAP3, TSR3, GNPTG	16	1351739	1352169	430	1351968	41	18363, -96, 69	downstream, upstream, in gene
	BAK1	6	33570942	33571434	492	33571232	44	9067	downstream
	BANP	16	87951805	87952102	297	87951968	18	2796	in gene
	BAP1, PHF7	3	52410559	52410838	279	52410656	25	-551, 98	upstream, in gene
	BARD1, LOC101928103	2	214809181	214809826	645	214809600	27	111, -629	in gene, upstream
	BARD1, LOC101928103	2	214809998	214810269	271	214810144	26	-433, -85	upstream, upstream
	BARHL2	1	90716874	90717072	198	90716896	13	341	in gene
	BATF3	1	212683326	212683574	248	212683424	32	16561	downstream
	BAX, FTL, GYS1	19	48965110	48966173	1063	48965280	47	10420, -29, 28073	downstream, upstream, downstream
	BAZ1A	14	34873679	34874964	1285	34874176	51	1471	in gene
	BAZ1B	7	73522043	73522262	219	73522128	20	170	in gene
	BAZ1B	7	73522545	73522849	304	73522688	18	-390	upstream
	BAZ2A, ATP5B	12	56630112	56630461	349	56630240	26	6576, 15828	in gene, downstream
	BAZ2A, ATP5B	12	56629559	56629972	413	56629920	21	6896, 16148	in gene, downstream
	BAZ2A, ATP5B, SNORD59B, SNORD59A	12	56645647	56646210	563	56645952	53	-9136, 116, -2198, -851	upstream, in gene, upstream, upstream
	BAZ2B, MARCH7	2	159712122	159712819	697	159712352	33	87, -105	in gene, upstream
	BBC3, MIR3190, MIR3191	19	47225869	47227978	2109	47227136	57	5860, 194, -117	in gene, downstream, upstream
	BBC3, MIR3190, MIR3191	19	47230162	47231158	996	47230992	51	2004, 4050, -3973	in gene, downstream, upstream
	BBC3, MIR3190, MIR3191	19	47228216	47228507	291	47228384	20	4612, 1442, -1365	in gene, downstream, upstream
	BBC3, MIR3190, MIR3191	19	47231338	47231555	217	47231424	20	1572, 4482, -4405	in gene, downstream, upstream
	BBIP1, SHOC2	10	110918507	110919126	619	110918656	19	710, -887	in gene, upstream
	BBS2	16	56519510	56520272	762	56520032	190	64	in gene
	BBS4	15	72686010	72686437	427	72686240	35	61	in gene
	BBX	3	107525733	107526013	280	107525824	12	2888	in gene
	BCAP31, ABCD1	X	153723625	153724606	981	153724352	37	394, -499	in gene, upstream
	BCAR3, MIR760, TRR-TCT1-1	1	93846206	93848140	1934	93846560	76	590, -272, -1013	in gene, upstream, upstream
	BCAS1	20	53949348	53949621	273	53949504	30	121261	in gene
	BCAS4	20	50794999	50795247	248	50795152	19	258	in gene
	BCDIN3D-AS1, BCDIN3D	12	49842872	49843243	371	49843072	39	14529, 57	downstream, in gene
	BCKDHB	6	80106519	80106846	327	80106704	29	77	in gene
	BCKDK, KAT8	16	31117522	31117900	378	31117728	35	9434, 64	downstream, in gene
	BCL10, LOC646626	1	85276311	85276982	671	85276512	38	392, 154	in gene, in gene
	BCL11B	14	99230337	99230551	214	99230432	23	41281	in gene
	BCL11B	14	99274284	99274545	261	99274432	19	-2719	upstream
	BCL2, KDSR	18	63320486	63320894	408	63320560	20	-782, 46713	upstream, downstream
	BCL2, KDSR	18	63318315	63318569	254	63318400	18	1378, 48873	in gene, downstream
	BCL2L1, LOC105372589, TPX2	20	31723289	31723901	612	31723568	32	396, 46134, -10251	in gene, downstream, upstream
	BCL2L12, PRMT1, MIR5088	19	49676931	49677890	959	49677344	54	12202, 192, -4773	downstream, in gene, upstream
	BCL2L12, PRMT1, MIR5088	19	49678206	49678402	196	49678272	15	13130, 1120, -3845	downstream, in gene, upstream
	BCL2L2-PABPN1, BCL2L2, PABPN1	14	23320757	23321370	613	23321184	31	14422, 14422, 996	in gene, downstream, in gene
	BCL3, MIR8085	19	44760720	44761248	528	44761088	36	13043, 2431	downstream, downstream
	BCL6	3	187745325	187745681	356	187745568	14	157	in gene
	BCL7B	7	73556966	73557534	568	73557312	30	423	in gene
	BCL7B	7	73557754	73558070	316	73557888	21	-153	upstream
	BCL7C, MIR4519, MIR762HG	16	30875031	30875661	630	30875296	40	19080, 27, -164	in gene, in gene, upstream
	BCL7C, MIR762HG, MIR762, CTF1	16	30902387	30902612	225	30902496	31	-8120, 27036, 8593, 6668	upstream, downstream, downstream, in gene
	BCL9	1	147599734	147600107	373	147599904	42	58503	in gene
	BCL9	1	147545124	147545373	249	147545216	22	3815	in gene
	BCL9L	11	118930075	118930306	231	118930208	21	-4590	upstream
	BCLAF1, LOC105378014	6	136289315	136289901	586	136289728	36	917, -5258	in gene, upstream
	BCLAF1, LOC105378014	6	136290074	136290796	722	136290416	35	229, -4570	in gene, upstream
	BCO2, PTS	11	112226352	112226829	477	112226432	32	50947, 67	downstream, in gene
	BCOR	X	40097585	40097957	372	40097760	42	79630	in gene
	BCOR	X	40098086	40098650	564	40098496	37	78894	in gene
	BCOR	X	40096045	40096255	210	40096160	14	81230	in gene
	BCOR, LOC105373181	X	40175741	40176543	802	40176320	26	1070, 5673	in gene, downstream
	BCOR, LOC105373181	X	40175329	40175525	196	40175456	14	1934, 4809	in gene, in gene
	BCR	22	23281398	23282084	686	23281824	143	101459	in gene
	BCR	22	23264017	23264335	318	23264176	40	83811	in gene
	BCR	22	23180313	23180556	243	23180432	21	67	in gene
	BCR	22	23264453	23264893	440	23264480	21	84115	in gene
	BDH1	3	197555561	197556096	535	197555872	21	17451	in gene
	BDH1	3	197554790	197554993	203	197554912	20	18411	in gene
	BDP1, MCCC2	5	71587088	71587663	575	71587456	41	132073, 168	downstream, in gene
	BEND3	6	107114282	107114591	309	107114416	19	766	in gene
	BEST1, FTH1, LOC399900	11	61966971	61968000	1029	61967568	135	20853, 92, -170	downstream, in gene, upstream
	BEST4, PLK3, TCTEX1D4, BTBD19	1	44800526	44800762	236	44800672	19	-7844, 720, 6770, -6785	upstream, in gene, downstream, upstream
	BFSP1	20	17505199	17505793	594	17505568	50	63652	in gene
	BFSP1, DSTN	20	17570082	17570411	329	17570272	26	-1052, 1099	upstream, in gene
	BHLHE40-AS1, BHLHE40	3	4977995	4979326	1331	4978272	59	1689, -1140	in gene, upstream
	BHLHE40-AS1, BHLHE40	3	4977287	4977903	616	4977392	29	2569, -2020	in gene, upstream
	BHLHE40-AS1, BHLHE40	3	4980412	4980676	264	4980480	25	-519, 1068	upstream, in gene
	BHMG1, SIX5, DMPK	19	45769461	45769672	211	45769568	20	45676, -329, 12989	downstream, upstream, downstream
	BICD1	12	32106893	32107115	222	32107008	23	272	in gene
	BICD2	9	92764879	92765445	566	92765024	45	-223	upstream
	BICD2	9	92764152	92764749	597	92764320	21	481	in gene
	BID, LINC00528	22	17777162	17777510	348	17777344	20	-2679, 54	upstream, in gene
	BID, MIR3198-1, LINC00528	22	17773663	17774387	724	17773856	74	809, -9597, -3434	in gene, upstream, upstream
	BIN1	2	127081788	127082203	415	127081952	37	25448	in gene
	BIN1, LOC105373605	2	127107083	127107286	203	127107200	18	200, -299	in gene, upstream
	BIN2, LOC105369767, CELA1	12	51323796	51324338	542	51324144	51	536, -136, 22535	in gene, upstream, downstream
	BIN3, LOC105369180	8	22668914	22669254	340	22669104	18	44, -4673	in gene, upstream
	BIRC3	11	102317169	102317740	571	102317344	47	-29	upstream
	BIRC3, BIRC2	11	102346780	102347538	758	102347264	44	29891, 82	downstream, in gene
	BIRC6	2	32356716	32357639	923	32357216	47	188	in gene
	BIVM, BIVM-ERCC5, ERCC5	13	102845391	102845973	582	102845760	33	46711, 38614, -81	downstream, in gene, upstream
	BLCAP, NNAT	20	37527667	37528159	492	37527936	43	-5, 6731	upstream, downstream
	BLK, LOC105379241	8	11558731	11558999	268	11558880	41	64889, -3078	in gene, upstream
	BLM	15	90819895	90820131	236	90820032	35	102705	downstream
	BLM	15	90818849	90819080	231	90818944	19	101617	downstream
	BLMH	17	30291770	30292037	267	30291840	20	326	in gene
	BLOC1S1-RDH5, BLOC1S1, RDH5, CD63, LOC105369779	12	55728880	55729602	722	55729216	42	13182, 13182, 8849, 457, -66	downstream, downstream, downstream, in gene, upstream
	BLOC1S1-RDH5, BLOC1S1, RDH5, CD63, LOC105369779	12	55728375	55728571	196	55728416	15	12382, 12382, 8049, 1257, -866	downstream, downstream, downstream, in gene, upstream
	BLOC1S1-RDH5, RDH5, CD63, LOC105369779	12	55730390	55730666	276	55730496	29	14462, 10129, -823, 1214	downstream, downstream, upstream, in gene
	BLOC1S1-RDH5, RDH5, CD63, LOC105369779	12	55729975	55730209	234	55730048	24	14014, 9681, -375, 766	downstream, downstream, upstream, in gene
	BLOC1S2, PKD2L1	10	100286517	100286713	196	100286688	15	24, 59836	in gene, downstream
	BLOC1S6	15	45587112	45587774	662	45587584	37	365	in gene
	BLVRB, SPTBN4	19	40466480	40466937	457	40466784	31	-966, 677	upstream, in gene
	BLVRB, SPTBN4	19	40465143	40465883	740	40465555	30	263, -552	in gene, upstream
	BMF	15	40108780	40109031	251	40108928	24	-44	upstream
	BMP2K	4	78775728	78776550	822	78776144	32	-234	upstream
	BMP8B, LOC105378666, LOC105378951, LOC101929536	1	39788652	39789436	784	39788800	30	61, 8816, 4164, -182	in gene, downstream, in gene, upstream
	BMP8B, OXCT2, LOC105378666, LOC105378951	1	39776360	39776638	278	39776448	20	12413, -5100, -3536, -8188	in gene, upstream, upstream, upstream
	BMPR1A	10	86755734	86756376	642	86756176	17	390	in gene
	BMPR2	2	202375901	202376703	802	202376000	21	-310	upstream
	BMS1	10	42782457	42782767	310	42782624	29	118	in gene
	BNC2	9	16871740	16871977	237	16871872	17	-1034	upstream
	BNIP2	15	59689045	59689543	498	59689200	28	329	in gene
	BNIP3	10	131981458	131982591	1133	131982352	35	-339	upstream
	BOD1	5	173616163	173616516	353	173616336	47	741	in gene
	BOD1L1, MIR5091	4	13627498	13628078	580	13627808	123	-103, -57	upstream, upstream
	BOLA3, BOLA3-AS1, MOB1A	2	74147699	74148083	384	74147840	20	72, -141, 31046	in gene, upstream, downstream
	BOP1, HSF1	8	144291202	144291448	246	144291360	21	78, -228	in gene, upstream
	BOP1, HSF1	8	144291941	144292238	297	144292128	19	-690, 540	upstream, in gene
	BPHL, TUBB2A, LOC105374889	6	3157304	3157968	664	3157696	57	39320, -147, 20	downstream, upstream, in gene
	BPNT1, IARS2	1	220094043	220094554	511	220094208	35	-4281, 95	upstream, in gene
	BPTF	17	67825231	67825586	355	67825440	28	-88	upstream
	BPTF, C17orf58	17	67993117	67993513	396	67993344	34	167816, 3440	downstream, in gene
	BRAF, LOC105375536	7	140924198	140924734	536	140924544	30	220, -542	in gene, upstream
	BRAP, ACAD10	12	111685515	111686245	730	111685952	60	44, -101	in gene, upstream
	BRAT1, IQCE	7	2555229	2555710	481	2555520	31	238, -3452	in gene, upstream
	BRAT1, IQCE	7	2558938	2559244	306	2559104	27	-3346, 132	upstream, in gene
	BRD1, LOC105377205	22	49826341	49827346	1005	49827008	32	540, 30652	in gene, downstream
	BRD3, LOC100130548	9	134066193	134066435	242	134066240	23	2293, 11950	in gene, downstream
	BRD4	19	15331364	15331828	464	15331552	48	991	in gene
	BRD4	19	15332072	15332338	266	15332192	39	351	in gene
	BRD7	16	50368328	50368761	433	50368597	15	369	in gene
	BRD9, TRIP13	5	882363	883157	794	882592	52	10232, -10262	in gene, upstream
	BRD9, TRIP13, LOC105374609	5	892823	893095	272	892928	22	-104, 74, 19665	upstream, in gene, downstream
	BRD9, TRIP13, LOC105374609	5	892466	892708	242	892576	18	248, -278, 20017	in gene, upstream, downstream
	BRE, LOC105374381, LOC105374382	2	28347878	28348351	473	28348160	31	457545, -798, -9851	downstream, upstream, upstream
	BRF1, PACS2	14	105290687	105291389	702	105290816	44	24761, -9995	in gene, upstream
	BRF1, PACS2	14	105300233	105301766	1533	105301120	43	14457, 309	in gene, in gene
	BRICD5, PGP, E4F1	16	2223436	2224038	602	2223760	26	-10220, -8939, 272	upstream, upstream, in gene
	BRICD5, PGP, E4F1	16	2223082	2223349	267	2223168	17	-9628, -8347, -320	upstream, upstream, upstream
	BRIX1, DNAJC21	5	34929424	34929680	256	34929520	26	13805, -73	downstream, upstream
	BRIX1, DNAJC21	5	34929846	34930132	286	34929984	23	14269, 391	downstream, in gene
	BRMS1L	14	35826226	35826621	395	35826352	27	34	in gene
	BRPF1, OGG1, CAMK1	3	9749699	9750451	752	9749920	94	18191, -24, 20067	downstream, upstream, downstream
	BRS3, HTATSF1	X	136496977	136497414	437	136497216	23	33401, 284	downstream, in gene
	BRWD1, BRWD1-IT2, BRWD1-AS1	21	39313094	39314450	1356	39313824	55	-5, -83, -1883	upstream, upstream, upstream
	BRWD1, BRWD1-IT2, BRWD1-AS1	21	39312396	39312630	234	39312496	24	1323, -1411, -3211	in gene, upstream, upstream
	BSG, HCN2	19	590878	591338	460	591248	20	19971, 1355	downstream, in gene
	BSG, HCN2	19	591553	591757	204	591712	19	20435, 1819	downstream, in gene
	BSN, APEH, MST1	3	49673661	49674146	485	49673856	31	119367, 726, 15672	downstream, in gene, downstream
	BST1	4	15756252	15756614	362	15756448	22	53498	in gene
	BST1, CD38	4	15778394	15779272	878	15779024	61	76074, 726	downstream, in gene
	BST2, MVB12A, BISPR	19	17405937	17406648	711	17406496	31	-848, 810, 810	upstream, in gene, in gene
	BTAF1	10	91923765	91924057	292	91923808	18	39	in gene
	BTBD1, MIR4515	15	83066746	83067339	593	83067040	26	394, -295	in gene, upstream
	BTBD10	11	13462826	13463358	532	13463168	18	129	in gene
	BTBD2	19	2016406	2016602	196	2016416	14	-713	upstream
	BTBD7, UNC79	14	93332714	93333406	692	93332896	22	196, -323	in gene, upstream
	BTBD9, LOC105375044	6	38639622	38640401	779	38639840	64	707, -555	in gene, upstream
	BTD	3	15647677	15647873	196	15647744	19	46392	downstream
	BTF3	5	73498630	73498885	255	73498763	18	338	in gene
	BTRC	10	101353463	101354423	960	101353920	137	-113	upstream
	BUB1, LOC105373554	2	110677871	110678619	748	110678176	36	-69, -12	upstream, upstream
	BUD13, LOC105369514, ZPR1	11	116772746	116773198	452	116772992	54	6, -244, 15031	in gene, upstream, downstream
	BYSL, CCND3	6	41936198	41936549	351	41936352	44	28505, 112542	downstream, in gene
	BYSL, CCND3	6	41940977	41941191	214	41941120	15	33273, 107774	downstream, in gene
	BZRAP1, BZRAP1-AS1, MIR142, MIR4736	17	58332491	58332775	284	58332576	19	-3781, 7126, -1258, 3446	upstream, in gene, upstream, downstream
	BZRAP1, BZRAP1-AS1, MIR142, MIR4736, SUPT4H1	17	58337997	58338376	379	58338176	40	-9381, 12726, -6858, -2154, 14062	upstream, in gene, upstream, upstream, downstream
	BZRAP1-AS1, MIR4736, SUPT4H1, RNF43	17	58344414	58344621	207	58344480	27	19030, -8458, 7758, 73140	in gene, upstream, downstream, downstream
	BZRAP1-AS1, SUPT4H1, RNF43	17	58351980	58352614	634	58352192	65	26742, 46, 65428	in gene, in gene, downstream
	C10orf2, LZTS2, PDZD7	10	100999225	100999676	451	100999488	24	12110, 2381, 31669	downstream, in gene, downstream
	C10orf76, HPS6	10	102055963	102056291	328	102056160	54	72, -9207	in gene, upstream
	C10orf76, HPS6	10	102065207	102065913	706	102065728	33	-9496, 361	upstream, in gene
	C10orf91, LOC105378570, LOC105378569	10	132453270	132453521	251	132453440	21	8230, 10584, -7149	downstream, downstream, upstream
	C11orf21, TSPAN32	11	2300438	2300650	212	2300544	19	1369, -1469	in gene, upstream
	C11orf21, TSPAN32, LOC105376518	11	2301708	2302346	638	2302016	32	-103, 3, 11631	upstream, in gene, downstream
	C11orf21, TSPAN32, LOC105376518	11	2301104	2301509	405	2301120	24	793, -893, 12527	in gene, upstream, downstream
	C11orf21, TSPAN32, LOC105376518	11	2302559	2302791	232	2302592	21	-679, 579, 11055	upstream, in gene, downstream
	C11orf21, TSPAN32, LOC105376518	11	2302896	2303245	349	2303136	20	-1223, 1123, 10511	upstream, in gene, downstream
	C11orf24, LOC105369363, LOC102724209	11	68271762	68272193	431	68272000	33	1, -87, -184	in gene, upstream, upstream
	C11orf42, FAM160A2, CNGA4	11	6234557	6234830	273	6234656	39	29613, 55, -118	downstream, in gene, upstream
	C11orf58	11	16738425	16738789	364	16738464	20	-137	upstream
	C11orf63	11	122882663	122882862	199	122882752	21	1113	in gene
	C11orf68, DRAP1, LOC105369349	11	65918702	65919929	1227	65918992	57	68, -265, -3572	in gene, upstream, upstream
	C11orf71, RBM7	11	114400543	114400923	380	114400736	50	-186, 207	upstream, in gene
	C11orf72, NDUFV1	11	67614088	67614547	459	67614272	51	-7566, 7420	upstream, downstream
	C11orf80	11	66744450	66744699	249	66744544	32	-192	upstream
	C11orf80, RCE1, PC	11	66842931	66843711	780	66843232	40	98496, -180, 115144	in gene, upstream, downstream
	C11orf88, LAYN	11	111540577	111540879	302	111540720	30	25935, 1735	downstream, in gene
	C12orf4, RAD51AP1	12	4538485	4538858	373	4538720	18	-212, -26	upstream, upstream
	C12orf49, RNFT2	12	116738056	116738363	307	116738208	29	-138, -83	upstream, upstream
	C12orf56	12	64390386	64390614	228	64390496	18	88	in gene
	C12orf57, RNU7-1, PTPN6, LOC105369634, LOC105369635, MIR200C, MIR141	12	6953712	6954252	540	6953920	24	10482, 10104, 7344, 9257, -9284, -9779, -10177	downstream, downstream, in gene, downstream, upstream, upstream, upstream
	C12orf60, WBP11, SMCO3	12	14803044	14803463	419	14803168	34	17951, 299, 11014	in gene, in gene, downstream
	C12orf66	12	64222362	64222571	209	64222400	19	14941	in gene
	C12orf73, TDG	12	103965778	103966266	488	103966016	58	-8801, 201	upstream, in gene
	C12orf79, BTG1, LOC101928617, LOC101930023	12	92144703	92145497	794	92144992	25	-2321, 905, -1093, 218866	upstream, in gene, upstream, downstream
	C14orf1, TTLL5	14	75660870	75661479	609	75661072	20	123, -136	in gene, upstream
	C14orf159, LOC105369173, GPR68	14	91228464	91230134	1670	91229888	81	115875, 13295, 40902	downstream, downstream, downstream
	C14orf28, LOC101927418	14	44897243	44897613	370	44897408	24	104, 14509	in gene, downstream
	C15orf27	15	76060330	76060550	220	76060464	19	518	in gene
	C15orf39	15	75201547	75202866	1319	75202112	77	3225	in gene
	C15orf40, BTBD1	15	83011174	83011751	577	83011648	23	650, 55786	in gene, downstream
	C15orf57, RPUSD2	15	40569267	40569773	506	40569376	34	-4319, 83	upstream, in gene
	C16orf46, LOC105371361, GCSH	16	81077071	81077461	390	81077248	25	19, 5558, 19127	in gene, downstream, downstream
	C16orf54	16	29745945	29746391	446	29746112	66	217	in gene
	C16orf54	16	29745597	29745860	263	29745680	22	649	in gene
	C16orf59, LOC105371052, LOC729652, NTN3, TBC1D24	16	2474098	2474357	259	2474176	24	14065, -3114, -5969, 2677, -970	downstream, upstream, upstream, downstream, upstream
	C16orf70, B3GNT9, TRADD, FBXL8, HSF4	16	67155263	67155765	502	67155584	33	45686, -4585, 4325, -4404, -7801	downstream, upstream, in gene, upstream, upstream
	C16orf72	16	9091577	9092388	811	9091744	54	64	in gene
	C16orf72	16	9082490	9082796	306	9082624	51	-9056	upstream
	C16orf72	16	9090267	9090784	517	9090640	28	-1040	upstream
	C16orf72	16	9091014	9091281	267	9091104	18	-576	upstream
	C16orf72	16	9092486	9092696	210	9092576	17	896	in gene
	C16orf74, MIR1910	16	85735227	85735738	511	85735488	60	15595, 6212	in gene, downstream
	C16orf87	16	46830591	46831511	920	46830944	26	218	in gene
	C16orf91, LOC105371044, LOC105371045, CCDC154	16	1428607	1428888	281	1428768	22	-7968, 75, -1541, 16076	upstream, in gene, upstream, downstream
	C16orf95, LOC101928659, FBXO31	16	87317048	87317572	524	87317296	43	124, -213, 74811	in gene, upstream, downstream
	C17orf51	17	21457431	21457703	272	21457504	16	94174	in gene
	C17orf62, LOC105371941, NARF	17	82458120	82459383	1263	82458496	103	-7665, -461, 312	upstream, upstream, in gene
	C17orf67	17	56787178	56787374	196	56787296	19	46766	downstream
	C17orf67, DGKE, LOC105371835	17	56833356	56834582	1226	56833696	28	366, -403, 9986	in gene, upstream, downstream
	C17orf67, DGKE, LOC105371835	17	56834722	56834954	232	56834848	27	-786, 749, 8834	upstream, in gene, downstream
	C17orf70, NPLOC4	17	81552157	81552582	425	81552432	37	-29, 84721	upstream, downstream
	C17orf74, TMEM102, FGF11, CHRNB1	17	7436856	7437225	369	7437056	20	12175, 8231, -1217, -8031	downstream, in gene, upstream, upstream
	C17orf85, LOC105371495	17	3846014	3846446	432	3846288	50	-37, -376	upstream, upstream
	C17orf96, LOC105371764	17	38674088	38674419	331	38674224	14	710, 31300	in gene, downstream
	C17orf99, SYNGR2, TK1	17	78168517	78168819	302	78168656	16	22616, 105, 18548	downstream, in gene, downstream
	C18orf25	18	46173666	46174783	1117	46174144	44	591	in gene
	C18orf8, NPC1	18	23503017	23503950	933	23503360	119	-110, 83257	upstream, downstream
	C19orf12	19	29714967	29715677	710	29715232	22	557	in gene
	C19orf26, ATP5D, LOC102723811, MIDN	19	1248570	1250287	1717	1249472	97	-7709, 7722, -968, 919	upstream, downstream, upstream, in gene
	C19orf26, ATP5D, LOC102723811, MIDN	19	1239890	1240325	435	1240000	19	1763, -1750, 8504, -8553	in gene, upstream, downstream, upstream
	C19orf26, ATP5D, LOC102723811, MIDN	19	1240417	1240613	196	1240512	17	1251, -1238, 7992, -8041	in gene, upstream, downstream, upstream
	C19orf26, ATP5D, LOC102723811, MIDN, LOC105372236	19	1250374	1253599	3225	1252672	59	-10909, 10922, -4168, 4119, 11930	upstream, downstream, upstream, in gene, downstream
	C19orf35, LINGO3	19	2289829	2291022	1193	2290208	44	-8026, 17949	upstream, in gene
	C19orf38, CARM1	19	10870975	10871413	438	10871136	22	34483, -441	downstream, upstream
	C19orf43, ASNA1	19	12734602	12734843	241	12734752	31	-37, -2740	upstream, upstream
	C19orf47, PLD3	19	40348236	40348641	405	40348448	52	79, 23	in gene, in gene
	C19orf60, CRLF1	19	18589248	18589617	369	18589408	30	723, 17442	in gene, downstream
	C19orf60, CRLF1	19	18588593	18589114	521	18588928	27	243, 17922	in gene, downstream
	C19orf66, ANGPTL6	19	10086073	10086330	257	10086208	13	89, 20001	in gene, downstream
	C19orf66, ANGPTL6, PPAN-P2RY11, PPAN, SNORD105, SNORD105B, P2RY11	19	10102248	10102653	405	10102432	31	16313, 3777, -3791, -3791, -5219, -7317, -9089	downstream, in gene, upstream, upstream, upstream, upstream, upstream
	C19orf67, SAMD1, PRKACA	19	14091128	14091541	413	14091232	19	-5437, -812, 26515	upstream, upstream, downstream
	C19orf70, HSD11B1L, RPL36	19	5680271	5680902	631	5680576	69	324, -189, -9685	in gene, upstream, upstream
	C19orf70, HSD11B1L, RPL36, LONP1, LOC105372254	19	5690365	5690742	377	5690528	26	-9628, 9763, 267, 29924, -1691	upstream, downstream, in gene, downstream, upstream
	C1D	2	68062870	68063127	257	68062976	21	51	in gene
	C1GALT1	7	7182468	7183033	565	7182752	40	205	in gene
	C1orf109, CDCA8	1	37692034	37692657	623	37692320	22	16, -81	in gene, upstream
	C1orf127	1	10964879	10965633	754	10965104	26	16933	in gene
	C1orf159	1	1115905	1116652	747	1116256	18	100	in gene
	C1orf174, LINC01134	1	3901011	3901306	295	3901168	30	-875, 764	upstream, in gene
	C1orf174, LINC01134	1	3900087	3900671	584	3900512	25	-219, 108	upstream, in gene
	C1orf174, LINC01134	1	3899778	3900009	231	3899840	19	453, -564	in gene, upstream
	C1orf198, LOC101927604	1	230868311	230868523	212	230868400	20	1189, -6446	in gene, upstream
	C1orf204, VSIG8	1	159854743	159855067	324	159854912	30	435, 7745	in gene, in gene
	C1orf21	1	184386935	184387749	814	184387520	67	504	in gene
	C1orf228, LOC105378690, RNU5F-1, RNU5D-1, KIF2C	1	44730607	44730904	297	44730688	20	55994, -6574, -8787, 480, -9024	downstream, upstream, upstream, downstream, upstream
	C1orf233, LOC105378586	1	1599240	1599640	400	1599403	14	693, -885	in gene, upstream
	C1orf234, KDM1A	1	23019246	23019974	728	23019424	51	-3574, -19	upstream, upstream
	C1orf43, UBAP2L	1	154220882	154221101	219	154221008	24	-211, 1057	upstream, in gene
	C1orf43, UBAP2L	1	154220372	154220730	358	154220704	14	93, 753	in gene, in gene
	C1orf52, BCL10	1	85259622	85259818	196	85259744	13	-72, 17160	upstream, downstream
	C1orf53, LHX9	1	197902471	197902948	477	197902736	23	184, -9769	in gene, upstream
	C1orf56, CDC42SE1, MLLT11	1	151059403	151059755	352	151059552	52	11769, 97, -123	downstream, in gene, upstream
	C1orf56, CDC42SE1, MLLT11	1	151057854	151058060	206	151057941	21	10158, 1708, -1734	downstream, in gene, upstream
	C1orf86, LOC105378593, LOC105378592	1	2205415	2205822	407	2205680	23	7040, -1333, 9531	in gene, upstream, downstream
	C1QTNF3-AMACR, AMACR, C1QTNF3	5	34007633	34008205	572	34007792	41	116736, 323, 35474	in gene, in gene, downstream
	C1QTNF6, SSTR3	22	37198999	37199247	248	37199168	17	-867, 21279	upstream, downstream
	C1RL-AS1, RBP5, CLSTN3	12	7131623	7131879	256	7131728	22	23420, -1492, 1357	downstream, upstream, in gene
	C20orf166-AS1, MIR1-1HG, MIR1-1	20	62550965	62551199	234	62551040	24	521, 587, -3266	in gene, in gene, upstream
	C20orf181, ABHD16B	20	63854304	63854587	283	63854464	39	-6152, -6749	upstream, upstream
	C20orf194, LOC105372509, LOC105372508	20	3407293	3407575	282	3407408	17	254, -609, 23434	in gene, upstream, downstream
	C20orf96, ZCCHC3	20	297303	298168	865	297504	62	-6726, -59	upstream, upstream
	C20orf96, ZCCHC3	20	298448	298648	200	298560	19	-7782, 997	upstream, in gene
	C21orf2	21	44339116	44339448	332	44339232	18	170	in gene
	C21orf58, PCNT	21	46323580	46324414	834	46323792	37	107, -308	in gene, upstream
	C21orf58, PCNT	21	46324639	46324853	214	46324736	22	-837, 636	upstream, in gene
	C21orf59	21	32612250	32612977	727	32612432	33	176	in gene
	C21orf91, LOC105372743, CHODL	21	17819017	17819758	741	17819328	53	58, 15900, -267	in gene, downstream, upstream
	C22orf15, CHCHD10, MMP11	22	23767667	23768172	505	23767824	21	7791, 148, -5025	downstream, in gene, upstream
	C22orf24, YWHAH	22	31944418	31944818	400	31944672	23	690, 179	in gene, in gene
	C22orf39, LOC105372860, UFD1L	22	19447320	19447703	383	19447488	30	744, -750, 31808	in gene, upstream, downstream
	C22orf39, LOC105372860, UFD1L	22	19447813	19448046	233	19447904	21	328, -334, 31392	in gene, upstream, downstream
	C2CD2	21	41928734	41929028	294	41928896	27	25061	in gene
	C2orf16	2	27572441	27572850	409	27572544	23	-3978	upstream
	C2orf16, ZNF512	2	27582828	27583169	341	27583040	36	6518, 71	downstream, in gene
	C2orf16, ZNF512	2	27573026	27573419	393	27573216	26	-3306, -9753	upstream, upstream
	C2orf42	2	70141826	70143000	1174	70142400	65	48619	downstream
	C2orf42	2	70190511	70190968	457	70190656	32	363	in gene
	C2orf44, FKBP1B	2	24047227	24047738	511	24047488	44	-62, -2218	upstream, upstream
	C2orf57, LOC105373928	2	231604257	231604642	385	231604448	25	11584, -7334	downstream, upstream
	C2orf72, PSMD1	2	231050691	231050947	256	231050768	37	13202, -6096	downstream, upstream
	C2orf72, PSMD1	2	231056585	231056886	301	231056704	26	19138, -160	downstream, upstream
	C2orf72, PSMD1	2	231052859	231053210	351	231053024	24	15458, -3840	downstream, upstream
	C3orf17	3	113019385	113019792	407	113019552	29	299	in gene
	C3orf18, HEMK1	3	50574458	50574769	311	50574592	47	-590, 5412	upstream, in gene
	C3orf58	3	143971490	143972669	1179	143972304	26	506	in gene
	C3orf62, MIR4271, USP4	3	49277074	49277333	259	49277168	12	-93, 3048, 62935	upstream, downstream, in gene
	C4orf22	4	80360090	80360312	222	80360160	24	24834	in gene
	C4orf27	4	169757793	169758000	207	169757888	20	54	in gene
	C4orf32	4	112145358	112145592	234	112145488	16	91	in gene
	C4orf46, ETFDH	4	158671314	158672311	997	158672144	38	111, 43	in gene, in gene
	C5AR2, DHX34	19	47349083	47349654	571	47349216	27	17375, -65	downstream, upstream
	C5orf15, LOC105379183, VDAC1	5	133968430	133968767	337	133968608	17	107, -81, 36781	in gene, upstream, downstream
	C5orf24	5	134845845	134846534	689	134845984	24	304	in gene
	C5orf28, LOC105374750, C5orf34	5	43483560	43484215	655	43483936	38	1242, 20, 31235	in gene, in gene, downstream
	C5orf30	5	103258952	103259585	633	103259104	23	363	in gene
	C5orf42, LOC105374727	5	37249000	37249482	482	37249184	20	244, 133	in gene, in gene
	C5orf51	5	41904186	41904688	502	41904384	90	95	in gene
	C5orf51, FBXO4	5	41924930	41925559	629	41925216	44	20927, -36	downstream, upstream
	C5orf56	5	132410518	132411355	837	132410976	52	203	in gene
	C5orf56	5	132456623	132456939	316	132456768	18	45995	in gene
	C5orf56, LOC102723741	5	132426593	132426795	202	132426624	24	15851, 5478	in gene, in gene
	C5orf56, LOC105379175	5	132466471	132467038	567	132466896	33	56123, 5789	in gene, downstream
	C5orf56, LOC105379175, IRF1	5	132472970	132473298	328	132473120	36	62347, -435, 17657	in gene, upstream, downstream
	C6orf132	6	42104373	42104877	504	42104480	25	38497	in gene
	C6orf165, SLC35A1	6	87472717	87473436	719	87473152	49	65180, 227	downstream, in gene
	C6orf201, ECI2, LOC100507506	6	4135371	4135567	196	4135440	16	56234, 157, -632	downstream, in gene, upstream
	C6orf203	6	107028022	107028448	426	107028341	23	169	in gene
	C6orf52, LOC105374923, PAK1IP1	6	10694408	10695107	699	10694592	25	205, 10380, 3727	in gene, downstream, in gene
	C6orf62	6	24720104	24720748	644	24720320	74	516	in gene
	C6orf62	6	24720923	24721124	201	24720960	18	-124	upstream
	C7orf13, RNF32	7	156640197	156640488	291	156640288	19	366, 2	in gene, in gene
	C7orf26, ZNF853	7	6615044	6615411	367	6615200	23	25832, -519	downstream, upstream
	C7orf50	7	1011077	1012513	1436	1011616	73	126659	in gene
	C7orf50, GPR146	7	1041967	1042883	916	1042288	124	95987, -2285	in gene, upstream
	C7orf50, GPR146	7	1044287	1044564	277	1044384	48	93891, -189	in gene, upstream
	C7orf50, GPR146	7	1056331	1056528	197	1056352	19	81923, 11779	in gene, in gene
	C7orf73	7	135662180	135662669	489	135662336	21	-137	upstream
	C8orf33	8	145052403	145052842	439	145052544	30	106	in gene
	C8orf37, C8orf37-AS1, TRS-AGA2-6	8	95268804	95269734	930	95269126	26	1211, 290, 612	in gene, in gene, downstream
	C8orf44-SGK3, SGK3	8	66775195	66775391	196	66775232	19	107680, 62814	in gene, in gene
	C8orf89, LOC105375900, RPL7, RDH10	8	73293935	73294983	1048	73294240	41	-8528, 8410, 254, -362	upstream, downstream, in gene, upstream
	C8orf89, LOC105375900, RPL7, RDH10	8	73295268	73295754	486	73295584	20	-9872, 9754, -1090, 982	upstream, downstream, upstream, in gene
	C9orf142, CLIC3	9	136996456	136996720	264	136996576	31	4158, -4	downstream, upstream
	C9orf142, CLIC3, ABCA2	9	136996897	136998509	1612	136998064	91	5646, -1492, 30910	downstream, upstream, downstream
	C9orf142, CLIC3, ABCA2	9	137000137	137000798	661	137000432	44	8014, -3860, 28542	downstream, upstream, downstream
	C9orf147, KIAA1958	9	112486400	112486787	387	112486592	28	3861, -376	in gene, upstream
	C9orf147, KIAA1958	9	112486968	112487378	410	112487040	22	3413, 72	in gene, in gene
	C9orf156, HEMGN	9	97922287	97922494	207	97922464	17	106, 22451	in gene, downstream
	C9orf171	9	132487123	132487732	609	132487520	38	77477	in gene
	C9orf171, BARHL1	9	132582124	132582456	332	132582272	20	172229, -334	downstream, upstream
	C9orf3	9	94726483	94726952	469	94726688	41	84	in gene
	C9orf3	9	94860920	94861274	354	94861088	29	134484	in gene
	C9orf3	9	95005061	95005276	215	95005184	18	278580	in gene
	C9orf40, C9orf41-AS1	9	74952387	74953095	708	74952896	20	-10, -69	upstream, upstream
	C9orf41	9	75027636	75028756	1120	75028224	69	262	in gene
	C9orf66, DOCK8	9	214701	215314	613	214880	28	1013, 15	in gene, in gene
	C9orf72	9	27572922	27573889	967	27573344	67	522	in gene
	C9orf78, USP20	9	129835577	129835828	251	129835680	15	-387, 263	upstream, in gene
	CA14, APH1A, C1orf54	1	150268622	150269172	550	150268896	49	11737, 313, -108	downstream, in gene, upstream
	CA9, TPM2, TLN1	9	35690095	35690313	218	35690224	22	16306, -168, 42171	downstream, upstream, downstream
	CA9, TPM2, TLN1	9	35689585	35689781	196	35689664	16	15746, 392, 42731	downstream, in gene, downstream
	CAAP1	9	26892557	26892944	387	26892768	24	60	in gene
	CAB39	2	230712610	230712918	308	230712768	23	-74	upstream
	CAB39L, SETDB2	13	49443687	49444705	1018	49444224	59	-90, 168	upstream, in gene
	CABIN1	22	24155679	24156701	1022	24156208	36	145016	in gene
	CABIN1	22	24156877	24157224	347	24157040	20	145848	in gene
	CABLES1	18	23266818	23267299	481	23267136	47	132572	downstream
	CABLES1	18	23231499	23231823	324	23231616	29	97052	in gene
	CABP4, TMEM134	11	67464446	67464758	312	67464608	20	12193, 4669	downstream, in gene
	CACNA1C, CACNA1C-AS1	12	2691405	2691987	582	2691488	16	720702, -331	in gene, upstream
	CACNA1C, LOC105369604	12	2034860	2035225	365	2035040	39	64254, 25	in gene, in gene
	CACNA2D2	3	50392398	50392611	213	50392480	30	111764	in gene
	CACNA2D2	3	50472979	50473299	320	50473136	30	31108	in gene
	CACNA2D2, LOC105377082	3	50450632	50451081	449	50450800	55	53444, -3287	in gene, upstream
	CACNB1, RPL19, STAC2	17	39199976	39200671	695	39200448	21	-2745, 165, 25339	upstream, in gene, downstream
	CACTIN, PIP5K1C	19	3626729	3627016	287	3626896	23	-81, 73596	upstream, downstream
	CACUL1	10	118754155	118755092	937	118754624	73	622	in gene
	CAGE1, RIOK1	6	7389403	7390347	944	7389888	38	-179, 469	upstream, in gene
	CALB2, LOC105371332	16	71358511	71358758	247	71358656	15	-57, 33480	upstream, downstream
	CALCOCO1, LOC105369774	12	53727457	53727900	443	53727616	22	-93, 1190	upstream, in gene
	CALCOCO2	17	48830969	48831455	486	48831200	35	212	in gene
	CALHM3, NEURL1-AS1	10	103471209	103471520	311	103471264	20	7976, 46178	downstream, downstream
	CALM1	14	90396783	90398565	1782	90397920	62	937	in gene
	CALM2	2	47176309	47177025	716	47176704	77	-103	upstream
	CALM2	2	47175906	47176218	312	47176032	19	569	in gene
	CALML6, TMEM52	1	1908775	1909112	337	1908912	29	-4840, 10389	upstream, downstream
	CALML6, TMEM52, CFAP74	1	1919138	1919560	422	1919360	30	5608, -59, 84477	downstream, upstream, downstream
	CALR, MIR6515, RAD23A, GADD45GIP1	19	12945671	12946024	353	12945824	60	7224, 5340, 10, 11430	downstream, downstream, in gene, downstream
	CALR3, C19orf44	19	16496053	16496344	291	16496160	17	32, -151	in gene, upstream
	CALY, BANF1P2	10	133335909	133337103	1194	133336912	55	59, 8087	in gene, downstream
	CAMK1D	10	12348740	12349774	1034	12349600	60	83	in gene
	CAMK1D	10	12448781	12449008	227	12448912	28	99395	in gene
	CAMK1D	10	12349873	12350229	356	12350000	23	483	in gene
	CAMK2D	4	113761598	113762759	1161	113762272	66	-139	upstream
	CAMK2D	4	113565011	113565213	202	113565088	19	197045	in gene
	CAMK2D	4	113637025	113637225	200	113637104	18	125029	in gene
	CAMK2G	10	73849136	73849455	319	73849280	43	25311	in gene
	CAMK2G	10	73874321	73874538	217	73874464	24	127	in gene
	CAMK4	5	111224232	111224494	262	111224352	13	103	in gene
	CAMKK1, P2RX1	17	3893082	3893457	375	3893248	35	1643, 23418	in gene, downstream
	CAMKK1, P2RX1	17	3892329	3892895	566	3892592	21	2299, 24074	in gene, downstream
	CAMKK2	12	121296878	121297444	566	121297184	19	1124	in gene
	CAMLG	5	134738346	134738721	375	134738528	38	601	in gene
	CAMLG, DDX46	5	134758620	134758882	262	134758816	15	20889, 82	downstream, in gene
	CAMSAP1	9	135907575	135908308	733	135907872	43	-621	upstream
	CAMSAP1	9	135805569	135805829	260	135805664	21	101587	downstream
	CAMSAP1	9	135907009	135907269	260	135907088	19	163	in gene
	CAMSAP2	1	200739068	200739333	265	200739168	15	-390	upstream
	CAMTA1	1	6784776	6785019	243	6784928	24	-396	upstream
	CAMTA1	1	6784398	6784603	205	6784448	16	-876	upstream
	CAMTA1, LOC105376690, LOC105376689	1	7704568	7704788	220	7704640	20	919316, -2989, -606	in gene, upstream, upstream
	CAMTA1, LOC105376690, LOC105376689	1	7705175	7705371	196	7705296	18	919972, -3645, -1262	in gene, upstream, upstream
	CAMTA2, LOC101927979, INCA1	17	4987140	4987635	495	4987456	33	217, -226, 10466	in gene, upstream, downstream
	CAMTA2, LOC101927979, INCA1, KIF1C	17	4997408	4997847	439	4997504	23	-9831, 9822, 418, -444	upstream, downstream, in gene, upstream
	CAND1	12	67268728	67269161	433	67268896	38	-385	upstream
	CAND1	12	67269424	67270170	746	67269600	30	319	in gene
	CAND2, RPL32, SNORA7A	3	12841229	12841686	457	12841312	20	44659, 270, -862	downstream, in gene, upstream
	CANT1, C1QTNF1-AS1	17	79009687	79010101	414	79009888	35	-71, 17767	upstream, downstream
	CANX, HMGB3P22	5	179698322	179699401	1079	179699008	96	20362, 4830	in gene, downstream
	CANX, MAML1	5	179732736	179733282	546	179733184	19	54538, 334	downstream, in gene
	CAPG, LOC105374841	2	85405682	85405888	206	85405744	19	12723, -8248	in gene, upstream
	CAPG, LOC105374841, SH2D6	2	85418454	85418680	226	85418560	24	-93, 4568, -172	upstream, downstream, upstream
	CAPN1, SLC22A20	11	65213639	65214433	794	65213968	100	32753, 128	downstream, in gene
	CAPN11, LOC105375072	6	44177026	44177419	393	44177216	29	18405, -8773	in gene, upstream
	CAPN14, RNA5SP90, EHD3	2	31233888	31234180	292	31234016	37	-45, 5704, 2	upstream, downstream, in gene
	CAPN15, MIR3176	16	546808	547458	650	547008	31	19252, 3731	in gene, downstream
	CAPN15, PRR35	16	554175	554371	196	554176	16	26420, -6246	in gene, upstream
	CAPN7	3	15205901	15206741	840	15206368	37	142	in gene
	CAPRIN1, NAT10	11	34105199	34105568	369	34105440	28	53823, -124	downstream, upstream
	CAPRIN2, LOC645485	12	30754516	30755356	840	30755136	58	68099, 107	in gene, in gene
	CAPS2, GLIPR1L1	12	75329972	75330445	473	75330208	36	60720, -4431	in gene, upstream
	CAPZA1, MOV10	1	112675082	112675476	394	112675232	15	55779, 920	downstream, in gene
	CAPZA2	7	116862437	116862845	408	116862624	51	115	in gene
	CAPZB	1	19485719	19486080	361	19485888	56	-247	upstream
	CAPZB	1	19485157	19485580	423	19485360	47	281	in gene
	CAPZB	1	19463267	19463486	219	19463392	24	22249	in gene
	CARD11	7	2902996	2903362	366	2903168	52	140777	downstream
	CARHSP1	16	8868270	8868529	259	8868416	29	596	in gene
	CARKD	13	110615591	110615851	260	110615680	23	220	in gene
	CARM1, YIPF2, C19orf52	19	10928609	10929169	560	10928992	35	57415, 20, 244	downstream, in gene, in gene
	CARNS1, RPS6KB2	11	67420537	67421296	759	67421088	68	5410, -7372	in gene, upstream
	CARNS1, RPS6KB2, PTPRCAP, LOC105369357, CORO1B	11	67434953	67435381	428	67435008	18	19330, 6548, 2674, -1349, 8813	downstream, in gene, downstream, upstream, downstream
	CARS	11	3014426	3014700	274	3014528	29	42923	in gene
	CARS, LOC105376524	11	3057276	3057609	333	3057344	29	107, -160	in gene, upstream
	CARS2, LOC105376684, ING1	13	110712286	110713836	1550	110712928	55	673, 1156, 305	in gene, in gene, in gene
	CARS2, LOC105376684, ING1	13	110715298	110716045	747	110715712	36	-2111, -1628, 3089	upstream, upstream, in gene
	CASC1, LYRM5, KRAS	12	25195198	25195581	383	25195360	38	-198, 144, 55571	upstream, in gene, downstream
	CASC10, MIR1915	10	21495683	21496277	594	21495872	19	1412, 769	in gene, downstream
	CASC11, MYC	8	127737760	127737981	221	127737824	23	-3857, 1755	upstream, in gene
	CASC11, MYC	8	127737110	127737459	349	127737168	18	-3201, 1099	upstream, in gene
	CASC15	6	22062841	22063426	585	22063168	75	396724	in gene
	CASK	X	41923443	41923731	288	41923568	21	-490	upstream
	CASKIN1, MLST8, BRICD5, PGP	16	2205182	2205423	241	2205312	21	-8848, 135, 8228, 9509	upstream, in gene, downstream, downstream
	CASKIN2, TSEN54, LLGL2	17	75515637	75516466	829	75515904	31	-321, 197, -9176	upstream, in gene, upstream
	CASKIN2, TSEN54, LLGL2	17	75525117	75525436	319	75525296	17	-9713, 9589, 216	upstream, downstream, in gene
	CASP3, PRIMPOL	4	184648716	184649339	623	184648864	21	611, -749	in gene, upstream
	CASP3, PRIMPOL	4	184649439	184649746	307	184649536	20	-61, -77	upstream, upstream
	CASP7	10	113679467	113679775	308	113679584	20	422	in gene
	CASP8	2	201258284	201258622	338	201258432	26	24989	in gene
	CASP9, DNAJC16	1	15524572	15524819	247	15524672	23	1857, -2141	in gene, upstream
	CASP9, DNAJC16	1	15524057	15524291	234	15524154	17	2375, -2659	in gene, upstream
	CASS4, RTFDC1	20	56463531	56463801	270	56463648	34	52100, -4937	downstream, upstream
	CASS4, RTFDC1	20	56468224	56468792	568	56468576	34	57028, -9	downstream, upstream
	CAST	5	96662061	96662659	598	96662496	22	459	in gene
	CAST	5	96657143	96657381	238	96657232	21	-4805	upstream
	CAST	5	96702558	96702869	311	96702720	18	40683	in gene
	CAST	5	96663177	96663373	196	96663264	14	1227	in gene
	CASZ1	1	10693907	10694103	196	10694016	16	102660	in gene
	CATIP-AS2, CATIP, CATIP-AS1	2	218367936	218368195	259	218368048	27	-10082, 11216, -146	upstream, in gene, upstream
	CATSPERG, PSMD8, GGN	19	38374639	38375210	571	38374816	45	39033, 266, 13767	downstream, in gene, downstream
	CBFA2T2	20	33490167	33490644	477	33490368	30	246	in gene
	CBFA2T3	16	88978843	88979279	436	88979104	26	-1905	upstream
	CBFA2T3, LOC100129697	16	88943163	88943535	372	88943296	42	33903, 3257	in gene, in gene
	CBFA2T3, LOC100129697	16	88940807	88941124	317	88940976	19	36223, 937	in gene, in gene
	CBFA2T3, LOC105371409, LOC100129697	16	88940400	88940646	246	88940504	14	36695, 15057, 465	in gene, downstream, in gene
	CBFB	16	67029172	67030014	842	67029504	65	357	in gene
	CBFB, C16orf70	16	67109889	67110177	288	67109952	23	80805, 54	downstream, in gene
	CBFB, C16orf70	16	67109107	67109309	202	67109168	15	80021, -730	downstream, upstream
	CBLB, LOC105374024	3	105869013	105869374	361	105869248	16	304, 11637	in gene, downstream
	CBLC	19	44770428	44770849	421	44770592	39	-7269	upstream
	CBR3-AS1, DOPEY2	21	36156613	36157057	444	36156896	31	-588, 113	upstream, in gene
	CBR4	4	169009639	169010402	763	169010208	55	109	in gene
	CBX1, SNX11	17	48101053	48101569	516	48101376	52	145, -6178	in gene, upstream
	CBX2, LOC105371917	17	79778221	79778573	352	79778368	21	1180, 3317	in gene, downstream
	CBX3P2, SMCHD1	18	2655477	2656484	1007	2655968	30	-573, 81	upstream, in gene
	CBX4	17	79843292	79843765	473	79843616	21	-4202	upstream
	CBX4	17	79843924	79844369	445	79844240	17	-4826	upstream
	CBX5, HNRNPA1	12	54279589	54280445	856	54280064	44	67, -632	in gene, upstream
	CBX6	22	38872250	38873080	830	38872416	46	-82	upstream
	CBX7	22	39145788	39146047	259	39145872	27	6790	in gene
	CBX7	22	39153079	39153458	379	39153248	22	-586	upstream
	CBX7	22	39144897	39145147	250	39144928	21	7734	in gene
	CBX7	22	39145236	39145627	391	39145480	21	7182	in gene
	CBX7	22	39152030	39152341	311	39152192	13	470	in gene
	CBX7	22	39152732	39152957	225	39152800	12	-138	upstream
	CBX8, LOC105371918	17	79798698	79798897	199	79798784	17	-1668, -515	upstream, upstream
	CBX8, LOC105371918	17	79798002	79798306	304	79798144	16	-1028, -1155	upstream, upstream
	CBY1, TOMM22, JOSD1	22	38681800	38682182	382	38681984	20	25331, 35, 19434	downstream, in gene, downstream
	CC2D1B, ORC1	1	52365703	52366227	524	52366048	40	157, 38423	in gene, downstream
	CCAR1	10	68721206	68721729	523	68721504	23	360	in gene
	CCBL1, LRRC8A	9	128882020	128882318	298	128882208	24	305, 96	in gene, in gene
	CCBL2, RBMXL1	1	88992307	88992961	654	88992512	41	448, 448	in gene, in gene
	CCDC102A, ADGRG5	16	57535885	57536778	893	57536000	47	1130, 6667	in gene, in gene
	CCDC110, LOC105377590	4	185471385	185471882	497	185471504	30	255, -170	in gene, upstream
	CCDC112, LOC105379129	5	115296179	115296679	500	115296496	41	265, -432	in gene, upstream
	CCDC113, LOC105371293	16	58249920	58250116	196	58250037	12	53073, -186	in gene, upstream
	CCDC114, EMP3	19	48320949	48322344	1395	48322080	110	715, -3290	in gene, upstream
	CCDC114, EMP3, TMEM143	19	48330037	48330742	705	48330192	49	-7397, 4822, 34045	upstream, in gene, downstream
	CCDC116, SDF2L1	22	21642178	21642538	360	21642240	21	10093, -13	downstream, upstream
	CCDC116, SDF2L1, MIR301B	22	21642816	21643058	242	21642848	24	10701, 595, -10133	downstream, in gene, upstream
	CCDC117	22	28772507	28773047	540	28772832	56	158	in gene
	CCDC12, NBEAL2	3	46979542	46979929	387	46979744	72	2274, 61	in gene, in gene
	CCDC12, NBEAL2	3	46987752	46988085	333	46987936	48	-5918, 8253	upstream, in gene
	CCDC12, NBEAL2	3	46976315	46976761	446	46976576	23	5442, -3107	in gene, upstream
	CCDC120, PRAF2, WDR45	X	49073881	49074134	253	49073984	14	20552, 61, 27137	downstream, in gene, downstream
	CCDC122, LACC1	13	43878988	43879854	866	43879168	42	522, -116	in gene, upstream
	CCDC124	19	17932643	17932998	355	17932784	24	-231	upstream
	CCDC127, SDHA	5	218699	219015	316	218816	22	-634, 593	upstream, in gene
	CCDC13, LOC729083, HIGD1A	3	42773008	42773231	223	42773120	14	133, 2508, 31415	in gene, in gene, downstream
	CCDC130	19	13747613	13748032	419	13747808	25	16045	in gene
	CCDC130, MRI1, C19orf53	19	13768510	13768706	196	13768608	16	36845, 4116, -5835	downstream, in gene, upstream
	CCDC134, SREBF2	22	41832963	41833990	1027	41833680	40	33058, 601	downstream, in gene
	CCDC134, SREBF2	22	41832477	41832673	196	41832576	17	31954, -503	downstream, upstream
	CCDC148, PKP4	2	158456637	158456877	240	158456800	20	24, -80	in gene, upstream
	CCDC148, PKP4	2	158457227	158457531	304	158457344	17	-520, 464	upstream, in gene
	CCDC151, PRKCSH	19	11435229	11435714	485	11435568	25	214, 311	in gene, in gene
	CCDC153, CBL	11	119205955	119206531	576	119206080	20	206, -196	in gene, upstream
	CCDC169-SOHLH2, CCDC169, SPG20	13	36297751	36297947	196	36297824	16	31, 31, 72356	in gene, in gene, downstream
	CCDC171	9	15552651	15552982	331	15552832	28	-42	upstream
	CCDC173, PHOSPHO2-KLHL23, PHOSPHO2	2	169694312	169694841	529	169694560	39	-139, 106, 106	upstream, in gene, in gene
	CCDC183, CCDC183-AS1, RABL6	9	136807477	136807758	281	136807568	25	11230, 1280, -354	in gene, in gene, upstream
	CCDC186, MIR2110, TDRD1	10	114173788	114174343	555	114173952	22	653, 227, -490	in gene, downstream, upstream
	CCDC23, ERMAP	1	42816863	42817502	639	42817248	27	140, 143	in gene, in gene
	CCDC25, ESCO2	8	27774297	27774702	405	27774464	20	-1809, 2987	upstream, in gene
	CCDC27, SMIM1, LRRC47	1	3772699	3773408	709	3772832	33	20434, 71, 23672	downstream, in gene, downstream
	CCDC30, PPIH	1	42658273	42658561	288	42658432	16	195114, 662	downstream, in gene
	CCDC38, AMDHD1	12	95943195	95943589	394	95943424	25	-170, 131	upstream, in gene
	CCDC47, DDX42	17	63774108	63774585	477	63774240	63	-512, 356	upstream, in gene
	CCDC47, DDX42	17	63773362	63773715	353	63773504	26	224, -380	in gene, upstream
	CCDC51, TMA7, ATRIP	3	48446602	48447059	457	48446720	23	-5642, 6444, 10	upstream, downstream, in gene
	CCDC53	12	102061868	102062066	198	102061936	17	188	in gene
	CCDC57	17	82212421	82213250	829	82212736	96	784	in gene
	CCDC57	17	82217542	82217941	399	82217728	34	-4208	upstream
	CCDC57	17	82216686	82217021	335	82216832	31	-3312	upstream
	CCDC59, METTL25	12	82358221	82358733	512	82358336	56	469, -70	in gene, upstream
	CCDC6	10	59905999	59906900	901	59906768	33	-112	upstream
	CCDC63	12	110846859	110847162	303	110847008	16	2522	in gene
	CCDC64	12	119988814	119989602	788	119988976	32	-823	upstream
	CCDC64	12	119989939	119990217	278	119990032	18	233	in gene
	CCDC64, RAB35	12	120086952	120087689	737	120087360	147	97561, 29479	in gene, downstream
	CCDC69, LOC105378230	5	151214150	151214553	403	151214304	39	9789, 2536	in gene, in gene
	CCDC69, LOC105378230	5	151214688	151215012	324	151214816	27	9277, 3048	in gene, in gene
	CCDC71L	7	106660586	106661122	536	106660880	28	308	in gene
	CCDC71L	7	106660030	106660356	326	106660192	21	996	in gene
	CCDC77, LOC105369594	12	401468	401780	312	401600	16	12250, -52	in gene, upstream
	CCDC83	11	85854936	85855171	235	85855040	29	-15	upstream
	CCDC84	11	118998026	118998337	311	118998144	28	3791	in gene
	CCDC84, RPS25, TRAPPC4, MIR3656, SLC37A4	11	119018123	119018901	778	119018624	27	24271, -277, 93, -320, 12282	downstream, upstream, in gene, upstream, downstream
	CCDC85B, FOSL1	11	65900110	65900731	621	65900512	43	10108, 14	downstream, in gene
	CCDC85C, HHIPL1	14	99604311	99604784	473	99604416	43	-26, -22	upstream, upstream
	CCDC85C, HHIPL1	14	99604953	99605268	315	99605040	26	-650, 602	upstream, in gene
	CCDC87, CCS	11	66592832	66593044	212	66592896	24	187, -266	in gene, upstream
	CCDC88A	2	55419680	55420167	487	55420000	32	-79	upstream
	CCDC88C, LOC105370625	14	91418094	91418553	459	91418320	22	-476, 111	upstream, in gene
	CCDC88C, LOC105370625	14	91417386	91417696	310	91417536	21	308, -673	in gene, upstream
	CCDC88C, LOC105370625	14	91418782	91419062	280	91418880	19	-1036, 671	upstream, in gene
	CCDC9	19	47256314	47256880	566	47256544	55	70	in gene
	CCDC9, INAFM1, LOC105372427	19	47274879	47275471	592	47275040	32	18566, 638, -5079	downstream, in gene, upstream
	CCDC9, INAFM1, LOC105372427	19	47274315	47274602	287	47274432	27	17958, 30, -5687	downstream, in gene, upstream
	CCDC9, INAFM1, LOC105372427	19	47273338	47273580	242	47273472	24	16998, -930, -6647	downstream, upstream, upstream
	CCDC9, INAFM1, LOC105372427	19	47273819	47274046	227	47273984	18	17510, -418, -6135	downstream, upstream, upstream
	CCDC91	12	28190312	28190934	622	28190592	40	2333	in gene
	CCDC91	12	28194540	28194923	383	28194720	32	6461	in gene
	CCDC92, ZNF664-FAM101A, ZNF664	12	123972825	123973077	252	123972960	24	25, -255, -255	in gene, upstream, upstream
	CCDC92, ZNF664-FAM101A, ZNF664	12	123972011	123972223	212	123972048	17	937, -1167, -1167	in gene, upstream, upstream
	CCDC92, ZNF664-FAM101A, ZNF664	12	123973177	123974087	910	123973664	15	-679, 449, 449	upstream, in gene, in gene
	CCDC94	19	4267697	4267941	244	4267776	21	20662	in gene
	CCDC97, TGFB1, LOC105372403	19	41327148	41328452	1304	41327712	156	17523, 26221, 4409	downstream, downstream, downstream
	CCHCR1, TCF19, POU5F1	6	31158320	31158520	200	31158400	20	-162, -126, 12293	upstream, upstream, downstream
	CCL17	16	57417009	57417322	313	57417136	34	20946	downstream
	CCL3	17	36089797	36090305	508	36089984	37	176	in gene
	CCL3	17	36082659	36082949	290	36082784	35	7376	downstream
	CCL4	17	36103310	36103604	294	36103440	23	-387	upstream
	CCNB1IP1, RPPH1, PARP2	14	20343051	20343287	236	20343200	14	-9888, 211, -414	upstream, in gene, upstream
	CCND1, ORAOV1	11	69642707	69643778	1071	69643328	42	2223, 32069	in gene, downstream
	CCND2-AS1, CCND2	12	4272269	4273155	886	4272896	87	3288, -837	in gene, upstream
	CCND2-AS1, CCND2	12	4269349	4269603	254	4269440	20	6744, -4293	in gene, upstream
	CCND3	6	42039573	42039874	301	42039744	46	9150	in gene
	CCND3, TAF8	6	42048677	42048939	262	42048800	25	94, -1713	in gene, upstream
	CCND3, TAF8	6	42050603	42050816	213	42050624	22	-1730, 111	upstream, in gene
	CCNE2, NDUFAF6	8	94895060	94896135	1075	94895883	19	770, 432	in gene, in gene
	CCNF	16	2428694	2429223	529	2428800	24	-594	upstream
	CCNF	16	2429424	2429847	423	2429824	15	430	in gene
	CCNF, LOC105371050, C16orf59, MIR6768, LOC105371052, LOC729652	16	2459772	2460070	298	2459904	18	30510, 118, -207, -4063, 11158, 8303	downstream, in gene, upstream, upstream, downstream, downstream
	CCNI	4	77075932	77076608	676	77076224	71	-211	upstream
	CCNI	4	77075553	77075850	297	77075680	25	333	in gene
	CCNJL	5	160312301	160312527	226	160312384	16	1319	in gene
	CCNL1, LOC101928236	3	157159520	157160752	1232	157160128	57	565, -3438	in gene, upstream
	CCNL2, LOC148413, MRPL20	1	1406858	1407966	1108	1407392	51	-8054, 7862, 442	upstream, downstream, in gene
	CCNL2, LOC148413, MRPL20	1	1399096	1399623	527	1399424	40	-86, -106, 8410	upstream, upstream, downstream
	CCNT1	12	48716380	48717382	1002	48716800	49	198	in gene
	CCNT2-AS1, CCNT2	2	134918604	134918949	345	134918720	34	-114, -102	upstream, upstream
	CCNY	10	35336130	35336723	593	35336336	34	89355	in gene
	CCNYL1	2	207711368	207711614	246	207711520	26	-20	upstream
	CCNYL1	2	207711829	207712038	209	207711952	25	412	in gene
	CCP110, C16orf62	16	19555142	19555394	252	19555280	28	31423, 207	downstream, in gene
	CCR3	3	46269610	46269829	219	46269744	19	59049	downstream
	CCSAP	1	229342669	229343234	565	229343008	20	-67	upstream
	CCSER1	4	90127939	90128386	447	90128096	25	702	in gene
	CCSER2	10	84328574	84328977	403	84328736	43	150	in gene
	CCSER2	10	84328170	84328449	279	84328288	37	-298	upstream
	CCSER2	10	84334130	84334336	206	84334272	21	5686	in gene
	CCT3, TSACC	1	156338283	156338925	642	156338592	40	-177, 1278	upstream, in gene
	CCT4, COMMD1	2	61888391	61888837	446	61888672	22	-1, -56	upstream, upstream
	CCT6B, LIG3	17	34980781	34981187	406	34980944	19	-25, 446	upstream, in gene
	CCT6B, LIG3	17	34980437	34980683	246	34980528	17	391, 30	in gene, in gene
	CCT8, MAP3K7CL	21	29073479	29074097	618	29073632	33	165, -3839	in gene, upstream
	CCT8, MAP3K7CL	21	29077234	29077557	323	29077344	15	-3547, -127	upstream, upstream
	CD109, LOC101928489	6	73696230	73696426	196	73696288	17	24106, -157	in gene, upstream
	CD151, POLR2L, TSPAN4	11	842457	843020	563	842688	121	9736, -159, -136	downstream, upstream, upstream
	CD164, PPIL6	6	109381694	109382539	845	109381888	122	671, 59283	in gene, downstream
	CD164, PPIL6	6	109382643	109383304	661	109382976	35	-417, 58195	upstream, downstream
	CD164L2, GPR3	1	27392420	27392814	394	27392608	18	-9275, -36	upstream, upstream
	CD19, NFATC2IP	16	28945695	28946003	308	28945824	26	13908, -5164	downstream, upstream
	CD1E	1	158366901	158367126	225	158366960	21	13525	downstream
	CD226	18	69935404	69935782	378	69935584	83	26203	in gene
	CD226	18	69897757	69897978	221	69897856	20	63931	in gene
	CD247, LOC101928512	1	167454622	167456222	1600	167455648	119	62968, 594	in gene, in gene
	CD247, LOC101928512	1	167486428	167486714	286	167486560	43	32056, 31506	in gene, in gene
	CD248	11	66316597	66316988	391	66316656	18	388	in gene
	CD276	15	73684384	73684610	226	73684491	15	210	in gene
	CD28	2	203706426	203706659	233	203706560	26	85	in gene
	CD2AP	6	47477797	47478451	654	47478176	27	430	in gene
	CD2AP	6	47477374	47477712	338	47477568	23	-178	upstream
	CD2BP2, LOC101928707, TBC1D10B	16	30350576	30350896	320	30350720	47	4641, -4675, 19538	downstream, upstream, downstream
	CD300A	17	74463494	74463868	374	74463648	51	-2718	upstream
	CD300A	17	74474115	74474699	584	74474528	46	8162	in gene
	CD300LB	17	74521690	74521986	296	74521792	34	9682	in gene
	CD320, NDUFA7	19	8308072	8308409	337	8308256	36	100, 13140	in gene, downstream
	CD3E	11	118316645	118316968	323	118316800	57	12220	downstream
	CD47, LOC105374030, LOC105374031	3	108090471	108091584	1113	108090912	164	176, -56, -7080	in gene, upstream, upstream
	CD47, LOC105374030, LOC105374031	3	108100025	108100305	280	108100144	29	-9056, -9288, 2152	upstream, upstream, in gene
	CD55	1	207321300	207321878	578	207321568	98	96	in gene
	CD55	1	207336628	207337000	372	207336800	49	15328	in gene
	CD55	1	207322053	207322304	251	207322112	19	640	in gene
	CD58, IGSF3	1	116570787	116571215	428	116571008	19	85, 96747	in gene, downstream
	CD59, FBXO3	11	33735615	33736541	926	33735872	24	607, 38659	in gene, downstream
	CD69, LOC105369653	12	9764898	9765153	255	9765008	18	-4107, -4171	upstream, upstream
	CD7	17	82305177	82306324	1147	82305472	31	12132	downstream
	CD7, SECTM1	17	82315848	82317686	1838	82317568	30	36, 16477	in gene, downstream
	CD7, SECTM1	17	82314496	82314735	239	82314656	21	2948, 19389	downstream, downstream
	CD7, SECTM1	17	82321400	82321596	196	82321472	19	-3868, 12573	upstream, in gene
	CD72, LOC101926948, SIT1	9	35646832	35647434	602	35647136	74	-279, 1016, 3814	upstream, in gene, downstream
	CD79A, ARHGEF1	19	41887278	41888396	1118	41887904	80	10784, 4731	downstream, in gene
	CD79A, ARHGEF1	19	41888974	41889644	670	41889120	53	12000, 5947	downstream, in gene
	CD79A, ARHGEF1	19	41884264	41884543	279	41884416	33	7296, 1243	downstream, in gene
	CD79A, ARHGEF1	19	41889775	41890177	402	41889984	31	12864, 6811	downstream, in gene
	CD81, TSSC4	11	2392278	2392767	489	2392480	64	16303, -7965	in gene, upstream
	CD81, TSSC4, TRPM5	11	2399887	2401069	1182	2400416	56	24239, -29, 34601	downstream, upstream, downstream
	CD81-AS1, LOC105376520, CD81	11	2377690	2378324	634	2377888	29	104, -2202, 1711	in gene, upstream, in gene
	CD83	6	14117347	14117574	227	14117376	31	120	in gene
	CD83	6	14117686	14118151	465	14117824	28	568	in gene
	CD96, PLCXD2, PLCXD2-AS1	3	111674342	111674659	317	111674496	37	132417, -180, 2937	downstream, upstream, downstream
	CDAN1, TTBK2	15	42736805	42737037	232	42736832	15	387, 184175	in gene, downstream
	CDC14A	1	100396716	100396952	236	100396816	23	51774	in gene
	CDC14B	9	96566776	96567009	233	96566880	23	52950	in gene
	CDC16, LOC105370384, MIR4502	13	114263623	114264009	386	114263808	51	28963, 17764, -10020	in gene, in gene, upstream
	CDC16, LOC105370384, MIR4502, UPF3A	13	114280553	114281851	1298	114281472	81	46627, 100, 7644, -112	downstream, in gene, downstream, upstream
	CDC16, LOC105370384, MIR4502, UPF3A	13	114282361	114282582	221	114282464	17	47619, -892, 8636, 880	downstream, upstream, downstream, in gene
	CDC16, MIR548AR, LOC105370384	13	114234812	114235173	361	114234976	24	131, -9529, 46596	in gene, upstream, downstream
	CDC25A, MIR4443	3	48188010	48188471	461	48188160	24	498, -8404	in gene, upstream
	CDC25C, LOC100128966, FAM53C	5	138337648	138338455	807	138337824	32	531, 5769, 289	in gene, downstream, in gene
	CDC27	17	47192635	47192831	196	47192768	16	-3456	upstream
	CDC34	19	531232	531553	321	531376	16	-343	upstream
	CDC37, MIR1181	19	10403281	10403823	542	10403648	24	-53, -110	upstream, upstream
	CDC37, MIR1181, PDE4A	19	10408739	10409052	313	10408896	24	-5301, -5358, -7877	upstream, upstream, upstream
	CDC42BPG, EHD1	11	64851126	64851447	321	64851360	23	-6687, 28353	upstream, downstream
	CDC42BPG, EHD1	11	64853315	64853530	215	64853408	19	-8735, 26305	upstream, in gene
	CDC42BPG, EHD1	11	64844357	64844668	311	64844416	18	257, 35297	in gene, downstream
	CDC42EP1, LGALS2	22	37567179	37567545	366	37567392	62	7614, 12625	in gene, downstream
	CDC42EP1, LGALS2	22	37566357	37566953	596	37566528	44	6750, 13489	in gene, downstream
	CDC42EP1, LGALS2	22	37561686	37561882	196	37561824	24	2046, 18193	in gene, downstream
	CDC42EP3	2	37671293	37671683	390	37671520	29	1015	in gene
	CDC42EP3	2	37671951	37672735	784	37672128	22	407	in gene
	CDC42SE2	5	131263725	131264372	647	131264112	36	103	in gene
	CDC73, LOC101929160	1	193121739	193122238	499	193122016	27	58, 8643	in gene, downstream
	CDCA4	14	105020448	105021296	848	105021024	110	64	in gene
	CDCA5, ZFPL1, TMEM262	11	65083886	65084306	420	65084064	67	86, -158, 5926	in gene, upstream, downstream
	CDCA7	2	173354764	173355560	796	173355360	29	1343	in gene
	CDCA7L	7	21945889	21946112	223	21945968	18	-44	upstream
	CDCP1	3	45105820	45106149	329	45105968	47	40454	in gene
	CDH13	16	82924387	82924679	292	82924544	25	297750	in gene
	CDH22	20	46251167	46251363	196	46251264	16	57565	in gene
	CDH23, C10orf105	10	71727202	71727398	196	71727264	18	330330, 10560	in gene, in gene
	CDH23, C10orf105	10	71736110	71736330	220	71736224	17	339290, 1600	in gene, in gene
	CDH23, C10orf54	10	71748896	71749110	214	71748992	28	352058, 24588	in gene, in gene
	CDH23, C10orf54	10	71773426	71773638	212	71773504	25	376570, 76	in gene, in gene
	CDH23, PSAP	10	71822401	71822624	223	71822528	20	425594, 28797	downstream, in gene
	CDH24, LOC105370705, ACIN1	14	23057809	23058041	232	23057920	13	-301, 1897, 37694	upstream, in gene, downstream
	CDH4	20	61719856	61720090	234	61719936	34	467510	in gene
	CDHR3	7	106022516	106022783	267	106022624	29	145424	in gene
	CDHR4, FAM212A, UBA7, MIR5193	3	49802742	49803424	682	49802976	21	188, -257, 10982, 3269	in gene, upstream, downstream, downstream
	CDHR5, SCT, DRD4	11	628510	628913	403	628720	40	-3653, -1480, -8585	upstream, upstream, upstream
	CDIP1, C16orf96	16	4538101	4538728	627	4538624	36	191, -85	in gene, upstream
	CDIPT, CDIPT-AS1, SEZ6L2	16	29862829	29863252	423	29863072	34	216, -611, 36192	in gene, upstream, downstream
	CDK10, LOC105371416, SPATA2L	16	89686869	89687263	394	89687040	16	14793, -1742, 14673	in gene, upstream, downstream
	CDK10, SPATA2L, LOC105371417	16	89696515	89696742	227	89696672	31	24425, 5041, -4819	downstream, in gene, upstream
	CDK10, SPATA2L, LOC105371417, VPS9D1	16	89700797	89701376	579	89701216	36	28969, 497, -275, 20056	downstream, in gene, upstream, downstream
	CDK10, SPATA2L, LOC105371417, VPS9D1	16	89701486	89701759	273	89701600	29	29353, 113, 109, 19672	downstream, in gene, in gene, downstream
	CDK10, SPATA2L, LOC105371417, VPS9D1, VPS9D1-AS1	16	89701876	89702076	200	89701952	24	29705, -239, 461, 19320, -9904	downstream, upstream, in gene, downstream, upstream
	CDK16, USP11	X	47233003	47233601	598	47233184	23	15303, 269	downstream, in gene
	CDK17	12	96399322	96400589	1267	96400320	118	268	in gene
	CDK19, AMD1	6	110814741	110815903	1162	110815392	57	1124, 771	in gene, in gene
	CDK2AP1	12	123270746	123271000	254	123270880	17	1436	in gene
	CDK5RAP2, LOC105376254	9	120579746	120580399	653	120580064	34	106, -1164	in gene, upstream
	CDK8	13	26254713	26254947	234	26254816	17	691	in gene
	CDK8	13	26254242	26254443	201	26254368	15	243	in gene
	CDKL2	4	75630171	75630579	408	75630288	24	249	in gene
	CDKL3, UBE2B	5	134371220	134371796	576	134371472	51	-3, 296	upstream, in gene
	CDKL3, UBE2B	5	134366864	134367272	408	134367056	41	4413, -4120	in gene, upstream
	CDKN1C, SLC22A18AS	11	2885066	2885397	331	2885248	28	568, 18697	in gene, downstream
	CDKN2AIP	4	183444037	183445174	1137	183444640	81	5	in gene
	CDKN2AIPNL, LOC105379186	5	134411709	134412165	456	134411872	31	2731, -134	in gene, upstream
	CDKN3	14	54396947	54397510	563	54397344	20	410	in gene
	CDNF, HSPA14	10	14837592	14838101	509	14837920	34	178, -240	in gene, upstream
	CDNF, HSPA14	10	14838178	14838467	289	14838240	23	-142, 80	upstream, in gene
	CDNF, HSPA14	10	14838702	14838975	273	14838816	19	-718, 656	upstream, in gene
	CDR2, LOC440346, LOC105371130	16	22373932	22374281	349	22374128	16	489, -195, -7956	in gene, upstream, upstream
	CDR2L, ICT1	17	75012463	75012884	421	75012672	32	25040, 8	downstream, in gene
	CDT1, APRT, GALNS	16	88803661	88803857	196	88803776	19	-2, 8158, 53190	upstream, downstream, downstream
	CDT1, APRT, GALNS	16	88811535	88811839	304	88811664	16	7886, 270, 45302	downstream, in gene, downstream
	CDV3	3	133574358	133574635	277	133574528	27	938	in gene
	CDV3	3	133573288	133574156	868	133573989	16	399	in gene
	CDX2	13	27953747	27954003	256	27953856	16	15512	downstream
	CDX2	13	27954373	27954633	260	27954448	12	14920	downstream
	CDYL, LOC101927913	6	4775827	4776136	309	4776000	27	69841, -452	in gene, upstream
	CEACAM19, CEACAM16	19	44691561	44691789	228	44691696	16	25104, -5808	downstream, upstream
	CEBPA, CEBPA-AS1, LOC105372369	19	33302824	33303160	336	33302880	18	-316, 23, 20323	upstream, in gene, downstream
	CEBPA, CEBPA-AS1, LOC105372369	19	33303557	33303810	253	33303648	15	-1084, 791, 19555	upstream, in gene, downstream
	CEBPG	19	33373193	33374057	864	33373536	70	-133	upstream
	CEBPZ, NDUFAF7	2	37231595	37232037	442	37231840	37	-243, 209	upstream, in gene
	CECR1	22	17219317	17219676	359	17219520	19	2334	in gene
	CECR5, CECR5-AS1	22	17158535	17159599	1064	17159040	23	6247, -349	in gene, upstream
	CECR5, CECR5-AS1, CECR1	22	17171348	17171946	598	17171808	34	-6521, 12419, 50046	upstream, downstream, downstream
	CELF1	11	47552542	47553391	849	47553152	47	12417	in gene
	CELF1, PTPMT1, KBTBD4	11	47565570	47565933	363	47565771	26	-202, 341, 13244	upstream, in gene, downstream
	CELF2	10	11178466	11179095	629	11178832	44	174191	in gene
	CELF2	10	11163226	11163494	268	11163328	34	158687	in gene
	CELF2	10	11237784	11238022	238	11237856	23	233215	in gene
	CELSR1	22	46374090	46374382	292	46374144	28	163358	in gene
	CELSR3, CELSR3-AS1	3	48661458	48661829	371	48661536	25	1379, -2232	in gene, upstream
	CELSR3, CELSR3-AS1	3	48656158	48656401	243	48656224	21	6691, -7544	in gene, upstream
	CEND1, SLC25A22, PANO1, PIDD1	11	797769	798269	500	798112	22	-7986, 157, 601, 11389	upstream, in gene, in gene, downstream
	CENPB, CDC25B	20	3795688	3796285	597	3795840	25	-9150, 9068	upstream, in gene
	CENPC	4	67545109	67545559	450	67545344	31	194	in gene
	CENPE	4	103198179	103198636	457	103198368	21	41	in gene
	CENPF, ABHD17AP3	1	214602898	214603459	561	214603248	28	69, 5955	in gene, downstream
	CENPH, MRPS36	5	69217768	69218182	414	69218016	28	28468, 270	downstream, in gene
	CENPJ	13	24922391	24923219	828	24922912	40	-23	upstream
	CENPM, LINC00634	22	41946942	41947211	269	41947072	38	92, -5115	in gene, upstream
	CENPT, THAP11, NUTF2	16	67846515	67847147	632	67846912	66	546, 4602, -4	in gene, downstream, upstream
	CENPT, THAP11, NUTF2	16	67842511	67843269	758	67842784	52	4674, 474, -4132	in gene, in gene, upstream
	CENPT, THAP11, NUTF2	16	67841851	67842432	581	67842016	26	5442, -294, -4900	in gene, upstream, upstream
	CENPT, THAP11, NUTF2	16	67847334	67847595	261	67847488	18	-30, 5178, 572	upstream, downstream, in gene
	CENPU	4	184733948	184734335	387	184734208	16	-76	upstream
	CEP104, DFFB	1	3857006	3857214	208	3857104	18	283, -39	in gene, upstream
	CEP112	17	66191854	66192510	656	66192224	58	-93	upstream
	CEP120	5	123422937	123423516	579	123423296	42	296	in gene
	CEP131, ENTHD2, LOC105371925	17	81222800	81223017	217	81222976	19	18, 16115, -6507	in gene, downstream, upstream
	CEP131, ENTHD2, LOC105371925	17	81223320	81223516	196	81223392	16	-398, 15699, -6091	upstream, downstream, upstream
	CEP170, SDCCAG8	1	243254515	243255621	1106	243254976	210	430, -443	in gene, upstream
	CEP170, SDCCAG8	1	243256008	243256214	206	243256096	20	-690, 677	upstream, in gene
	CEP19, PIGX	3	196711877	196712944	1067	196712384	65	-90, 10	upstream, in gene
	CEP290, TMTC3	12	88141854	88142174	320	88142016	23	200, -280	in gene, upstream
	CEP295	11	93661424	93662016	592	93661552	31	-98	upstream
	CEP55	10	93496534	93496939	405	93496672	20	60	in gene
	CEP70	3	138594256	138594652	396	138594400	40	-17	upstream
	CEP78	9	78236098	78236431	333	78236256	20	194	in gene
	CEP83, CEP83-AS1	12	94459409	94459980	571	94459776	46	212, -227	in gene, upstream
	CEP85, SH3BGRL3, UBXN11	1	26279977	26280326	349	26280064	28	45911, 342, 38201	downstream, in gene, downstream
	CEP85, SH3BGRL3, UBXN11	1	26284681	26284878	197	26284800	23	50647, 5078, 33465	downstream, downstream, in gene
	CEP85L	6	118650744	118651431	687	118651232	27	58850	in gene
	CEP85L	6	118719502	118719698	196	118719568	22	-9486	upstream
	CEP89, C19orf40, RHPN2	19	32971792	32971988	196	32971968	17	61, -249, 92950	in gene, upstream, downstream
	CEP97	3	101724575	101725039	464	101724832	27	748	in gene
	CEP97, NXPE3	3	101778924	101779326	402	101779040	29	54956, -145	downstream, upstream
	CERCAM	9	128420868	128421076	208	128420992	19	9417	in gene
	CERCAM	9	128420308	128420734	426	128420320	18	8745	in gene
	CERS4	19	8209334	8209946	612	8209664	21	335	in gene
	CERS4	19	8253228	8253424	196	8253312	13	43983	in gene
	CERS5, LOC101927340, LIMA1	12	50166935	50167520	585	50167360	57	173, 23937, 116210	in gene, downstream, downstream
	CES4A	16	67013895	67014184	289	67013984	23	25395	downstream
	CETN3	5	90409964	90410192	228	90410048	18	-262	upstream
	CFAP20, LOC101927556	16	58129080	58129576	496	58129344	31	48, -136	in gene, upstream
	CFAP36	2	55519548	55519844	296	55519648	24	53	in gene
	CFAP43	10	104232095	104232351	256	104232208	28	158	in gene
	CFAP53, LOC105376869, MBD1	18	50266291	50266653	362	50266432	43	63, -5377, 15342	in gene, upstream, downstream
	CFAP61, INSM1	20	20368988	20369184	196	20369088	21	316574, 967	downstream, in gene
	CFAP74	1	1946726	1946922	196	1946752	15	57085	in gene
	CFAP97, SNX25	4	185203578	185204102	524	185203776	30	5719, -466	in gene, upstream
	CFAP97, SNX25	4	185209391	185209632	241	185209493	18	2, 5251	in gene, in gene
	CFAP99, LOC105374353, RNF4	4	2468657	2470035	1378	2469008	67	50115, 5994, -60	downstream, downstream, upstream
	CFAP99, LOC105374353, RNF4	4	2462721	2463036	315	2462880	23	43987, -134, -6188	in gene, upstream, upstream
	CFB, NELFE, MIR1236, SKIV2L	6	31958776	31959119	343	31958976	38	13032, 111, -2036, 172	downstream, in gene, upstream, in gene
	CFDP1, TMEM170A	16	75433097	75434076	979	75433440	20	72, 31297	in gene, downstream
	CFL2	14	34714356	34714929	573	34714576	29	247	in gene
	CFP, ELK1	X	47634868	47635155	287	47635040	19	-4735, 15564	upstream, downstream
	CGB8, CGB7, LOC105376902, NTF4, KCNA7	19	49057694	49058013	319	49057856	15	-8745, -68, 3109, 7220, 15085	upstream, upstream, in gene, downstream, downstream
	CGGBP1, LOC105377200	3	88058460	88059497	1037	88058912	46	90954, -309	in gene, upstream
	CGGBP1, ZNF654, C3orf38	3	88149583	88150146	563	88149696	25	170, 10584, -47	in gene, downstream, upstream
	CGN, TUFT1, MIR554	1	151540245	151540485	240	151540320	15	29443, 20, -5476	downstream, in gene, upstream
	CGRRF1	14	54509697	54510099	402	54509936	25	67	in gene
	CH25H, LIPA	10	89207880	89208082	202	89208000	15	-686, 44039	upstream, downstream
	CHAC1, LOC105370789	15	40953041	40953548	507	40953248	32	-190, -9255	upstream, upstream
	CHCHD2, NUPR1L	7	56106281	56106755	474	56106608	30	-114, 9789	upstream, downstream
	CHCHD2P6	1	15603608	15603804	196	15603712	20	-816	upstream
	CHCHD3	7	133081964	133082396	432	133082240	25	-161	upstream
	CHCHD4, TMEM43	3	14124413	14124956	543	14124768	33	103, -172	in gene, upstream
	CHCHD6	3	126911485	126912097	612	126911712	44	207492	in gene
	CHCHD6	3	126908824	126909079	255	126908928	28	204708	in gene
	CHCHD6	3	126703919	126704321	402	126704192	24	-28	upstream
	CHD1, LOC100289230	5	98928268	98929587	1319	98929248	28	-625, 114	upstream, in gene
	CHD1L	1	147242510	147243280	770	147242832	30	191	in gene
	CHD3, SCARNA21, LOC284023, KCNAB3	17	7916110	7916518	408	7916208	19	31432, 10085, -261, 13227	downstream, downstream, upstream, downstream
	CHD4, LOC105369629, LOC105369631	12	6607041	6607452	411	6607328	20	111, 868, -6633	in gene, in gene, upstream
	CHD4, LOC105369629, LOC105369631	12	6606409	6606703	294	6606528	14	911, 68, -7433	in gene, in gene, upstream
	CHD9	16	53130082	53131341	1259	53130752	59	75754	in gene
	CHD9	16	53099304	53099557	253	53099376	20	44378	in gene
	CHEK2, HSCB	22	28741778	28742274	496	28742096	26	-191, 95	upstream, in gene
	CHERP, SLC35E1	19	16542041	16542909	868	16542368	44	84, 30014	in gene, downstream
	CHFR, LOC101928530	12	132887493	132888382	889	132887744	80	-126, -98	upstream, upstream
	CHFR, LOC101928530	12	132887055	132887382	327	132887200	26	418, -642	in gene, upstream
	CHIC2	4	54064141	54064891	750	54064512	118	915	in gene
	CHID1	11	910657	910858	201	910768	20	4290	in gene
	CHKA, LOC105369362	11	68121008	68121822	814	68121472	107	-81, -177	upstream, upstream
	CHKA, LOC105369362	11	68120432	68120717	285	68120528	29	863, -1121	in gene, upstream
	CHKA, LOC105369362	11	68121902	68122105	203	68121984	27	-593, 335	upstream, in gene
	CHKB-CPT1B, CPT1B, CHKB, CHKB-AS1	22	50582501	50582923	422	50582752	35	247, -4085, 247, -274	in gene, upstream, in gene, upstream
	CHMP1A, SPATA33	16	89657504	89658041	537	89657888	18	-103, 144	upstream, in gene
	CHMP2A, UBE2M, MZF1-AS1, MZF1	19	58562426	58563194	768	58562944	40	-7816, -3968, 3758, 11495	upstream, upstream, in gene, in gene
	CHMP5, NFX1, LOC105376019	9	33290134	33290605	471	33290384	43	25505, -36, -226	downstream, upstream, upstream
	CHMP6	17	80991590	80992063	473	80991888	26	47	in gene
	CHMP7	8	23246499	23247058	559	23246752	54	3115	in gene
	CHN2	7	29285378	29285684	306	29285536	28	138989	in gene
	CHN2, LOC102724484	7	29194457	29195173	716	29194720	37	48173, 14250	in gene, downstream
	CHP1, OIP5-AS1	15	41283803	41284389	586	41284080	111	52931, 77	downstream, in gene
	CHPF, TMEM198, MIR3132, OBSL1	2	219552511	219552765	254	219552608	26	-8843, 8945, -3461, 18969	upstream, downstream, upstream, in gene
	CHPF, TMEM198, MIR3132, OBSL1	2	219552864	219553060	196	219552928	18	-9163, 9265, -3781, 18649	upstream, downstream, upstream, in gene
	CHRAC1, AGO2	8	140511058	140511807	749	140511440	78	142, 130886	in gene, downstream
	CHRAC1, AGO2	8	140511908	140512298	390	140512096	17	798, 130230	in gene, downstream
	CHRNG, TIGD1, EIF4E2, MIR5001	2	232550357	232551015	658	232550848	29	11121, -258, 791, -275	downstream, upstream, in gene, upstream
	CHST10	2	100417270	100417588	318	100417472	12	196	in gene
	CHST11	12	104687868	104688197	329	104688000	53	231086	in gene
	CHST11	12	104456697	104457464	767	104456880	32	-34	upstream
	CHST11	12	104569798	104570104	306	104569952	31	113038	in gene
	CHST11	12	104695619	104695873	254	104695744	28	238830	in gene
	CHST11	12	104519386	104519590	204	104519456	21	62542	in gene
	CHST11	12	104720446	104720731	285	104720576	19	263662	in gene
	CHST11	12	104458177	104458434	257	104458304	14	1390	in gene
	CHST12	7	2418052	2418560	508	2418336	91	14810	in gene
	CHST12	7	2403639	2404412	773	2403840	29	314	in gene
	CHST12	7	2400029	2400272	243	2400160	22	-3366	upstream
	CHST12	7	2405522	2405892	370	2405696	19	2170	in gene
	CHST12	7	2406137	2406333	196	2406208	17	2682	in gene
	CHST2, LOC105374137	3	143119714	143121303	1589	143120000	31	224, 12846	in gene, downstream
	CHSY1	15	101251759	101252526	767	101252032	33	-100	upstream
	CHSY1	15	101237445	101237680	235	101237552	18	14380	in gene
	CHTF18, GNG13, PRR25	16	807435	807764	329	807568	17	18946, -6835, 2125	downstream, upstream, in gene
	CHURC1-FNTB, CHURC1	14	64914510	64915000	490	64914688	81	327, 327	in gene, in gene
	CIART, LOC105371434, MRPS21	1	150293795	150294225	430	150294040	20	11507, -318, 198	downstream, upstream, in gene
	CIB1, TTLL13P, NGRN	15	90265649	90265954	305	90265792	41	-33, 16260, 129	upstream, downstream, in gene
	CIC	19	42283530	42283841	311	42283696	31	15159	in gene
	CIC	19	42280304	42280811	507	42280640	29	12103	in gene
	CIC	19	42268321	42268563	242	42268384	21	-153	upstream
	CIC	19	42284656	42284856	200	42284736	21	16199	in gene
	CIDEC	3	9862525	9862911	386	9862816	14	17446	downstream
	CIITA, DEXI, CLEC16A	16	10944252	10944840	588	10944512	63	78300, -2112, 24	downstream, upstream, in gene
	CIITA, DEXI, CLEC16A	16	10942176	10942503	327	10942464	14	76252, -64, -2024	downstream, upstream, upstream
	CINP, TECPR2, LOC105370678	14	102362829	102363470	641	102363072	24	-156, 109, 32473	upstream, in gene, downstream
	CIPC	14	77097963	77098243	280	77098096	24	-139	upstream
	CIR1, SCRN3	2	174395760	174396074	314	174395920	22	-205, 191	upstream, in gene
	CIRBP-AS1, CIRBP, C19orf24	19	1275156	1275930	774	1275712	52	-5452, 6446, 191	upstream, downstream, in gene
	CISTR, LOC105378250	12	53751412	53751814	402	53751680	20	5354, -2677	in gene, upstream
	CITED1, LOC105373250	X	72305473	72305876	403	72305688	13	1499, -370	in gene, upstream
	CITED2	6	139374501	139375458	957	139374816	48	-166	upstream
	CITED2	6	139373361	139373657	296	139373504	20	1146	in gene
	CIZ1, LOC105376285	9	128191192	128192008	816	128191648	25	12735, 8314	in gene, downstream
	CIZ1, LOC105376285, DNM1	9	128203344	128203631	287	128203424	23	959, -3462, 69	in gene, upstream, in gene
	CKAP2L, IL1A	2	112764690	112764910	220	112764768	36	-91, 20626	upstream, downstream
	CKAP4, LOC101929132	12	106247579	106248085	506	106247680	22	255, -557	in gene, upstream
	CKAP5, LRP4-AS1	11	46845773	46846514	741	46846208	63	100, -203	in gene, upstream
	CKB, TRMT61A	14	103529170	103529436	266	103529280	27	-6421, 108	upstream, in gene
	CKMT2-AS1, ZCCHC9	5	81301486	81301888	402	81301632	38	-63, 49	upstream, in gene
	CLASP1, LOC105373990, NIFK-AS1	2	121649232	121650452	1220	121649616	50	-140, 39214, -38	upstream, downstream, upstream
	CLASP1, RNU4ATAC	2	121530218	121531229	1011	121530901	35	118575, 21	in gene, in gene
	CLASP2	3	33717701	33718302	601	33718112	25	244	in gene
	CLASRP, ZNF296, GEMIN7, LOC105372419	19	45079059	45079737	678	45079216	59	40176, -2786, 3477, 11059	downstream, upstream, in gene, downstream
	CLASRP, ZNF296, GEMIN7, LOC105372419	19	45075705	45076523	818	45076096	28	37056, 334, 357, 14179	downstream, in gene, in gene, downstream
	CLCC1	1	108956587	108957087	500	108956784	41	6715	in gene
	CLCC1, WDR47	1	108962983	108963611	628	108963232	151	267, 78996	in gene, downstream
	CLCN2, POLR2H, THPO	3	184362815	184363505	690	184363344	35	-1693, 1630, 16344	upstream, in gene, downstream
	CLCN7	16	1474812	1475319	507	1475152	25	-68	upstream
	CLDN15, FIS1	7	101245060	101245309	249	101245088	17	-6268, 2	upstream, in gene
	CLDN6, TNFRSF12A, HCFC1R1, THOC6, CCDC64B, LOC100128770, LOC105371057	16	3028070	3028266	196	3028224	16	-10037, 7912, -3928, 4193, 8739, -4257, 17695	upstream, downstream, upstream, downstream, in gene, upstream, downstream
	CLDN9, CLDN6, TNFRSF12A, HCFC1R1, THOC6, CCDC64B	16	3020972	3021379	407	3021184	27	8728, -2997, 872, 3112, -2847, 15779	downstream, upstream, in gene, downstream, upstream, downstream
	CLDN9, CLDN6, TNFRSF12A, HCFC1R1, THOC6, CCDC64B, LOC100128770	16	3024025	3024271	246	3024096	24	11640, -5909, 3784, 200, 65, 12867, -8385	downstream, upstream, downstream, in gene, in gene, downstream, upstream
	CLDND1, LOC105374001, GPR15	3	98522517	98522973	456	98522752	47	314, -322, -9147	in gene, upstream, upstream
	CLEC10A	17	7081720	7082003	283	7081856	24	-1255	upstream
	CLECL1	12	9741842	9742070	228	9741968	30	-8669	upstream
	CLHC1, RPS27A, MTIF2	2	55232476	55233158	682	55232736	23	-173, 833, 36567	upstream, in gene, downstream
	CLIC4	1	24744971	24745463	492	24745248	26	-21	upstream
	CLIC4, LOC105376876	1	24848016	24848918	902	24848480	187	103211, -8863	downstream, upstream
	CLINT1	5	157858618	157858969	351	157858880	21	295	in gene
	CLIP2	7	74306322	74306600	278	74306496	20	17021	in gene
	CLK1, PPIL3	2	200864232	200864543	311	200864368	27	376, 24965	in gene, downstream
	CLK1, PPIL3	2	200863835	200864094	259	200863989	12	755, 25344	in gene, downstream
	CLK2, HCN3	1	155273260	155273737	477	155273536	19	-7, -3891	upstream, upstream
	CLK3, LOC102723750	15	74614720	74615105	385	74614912	29	16436, 167	in gene, in gene
	CLK3, LOC102723750	15	74615305	74615977	672	74615536	27	17060, -457	in gene, upstream
	CLK4	5	178627276	178627482	206	178627360	20	3279	in gene
	CLN3, LOC105371165, APOBR, IL27	16	28494099	28494550	451	28494240	56	-1938, 1872, -409, 32159	upstream, downstream, upstream, downstream
	CLN5, FBXL3	13	76991360	76992418	1058	76991584	73	-340, 35612	upstream, downstream
	CLN6	15	68229347	68229653	306	68229504	14	238	in gene
	CLOCK, PDCL2	4	55545834	55547187	1353	55546016	54	893, 46252	in gene, downstream
	CLP1, ZDHHC5	11	57667798	57668678	880	57668480	41	10736, 478	downstream, in gene
	CLPB	11	72434225	72434627	402	72434448	28	232	in gene
	CLPP, ALKBH7, PSPN, GTF2F1	19	6372737	6372999	262	6372896	21	11444, 463, 2953, 20384	downstream, in gene, downstream, downstream
	CLPP, ALKBH7, PSPN, GTF2F1	19	6374219	6374454	235	6374336	16	12884, 1903, 1513, 18944	downstream, in gene, downstream, downstream
	CLPTM1, RELB	19	45001488	45001860	372	45001600	20	47015, 151	downstream, in gene
	CLPTM1L	5	1345015	1345487	472	1345216	22	-151	upstream
	CLTA	9	36190894	36191372	478	36191040	28	184	in gene
	CLTC	17	59619187	59619912	725	59619744	47	55	in gene
	CLTCL1, LOC105372859	22	19291425	19291659	234	19291520	21	205, -394	in gene, upstream
	CLU, MIR6843	8	27614266	27614586	320	27614400	26	631, -3649	in gene, upstream
	CLUH, LOC105371591, LOC105371592, LOC105371491	17	2711060	2711372	312	2711232	29	401, -2740, 2569, 12026	in gene, upstream, in gene, downstream
	CLUH, LOC105371591, LOC105371592, LOC105371491	17	2711570	2711993	423	2711797	20	-164, -3305, 3134, 11461	upstream, upstream, in gene, downstream
	CLUHP3	16	31700636	31701253	617	31700864	28	251	in gene
	CLUHP3, ZNF720	16	31713443	31713692	249	31713536	27	12923, 307	downstream, in gene
	CLUL1, TYMSOS, TYMS	18	657411	657672	261	657472	15	60474, 868, -132	downstream, in gene, upstream
	CLYBL, LOC101927437	13	99859759	99860125	366	99859952	114	253288, 97213	in gene, in gene
	CMC1	3	28251992	28252355	363	28252160	52	10571	in gene
	CMC1, AZI2	3	28326580	28326828	248	28326688	27	85099, 22736	downstream, in gene
	CMC2, CENPN	16	81006521	81007425	904	81006944	34	-47, 446	upstream, in gene
	CMIP	16	81521282	81521499	217	81521312	29	76142	in gene
	CMIP	16	81513885	81514081	196	81513971	12	68801	in gene
	CMIP, LOC105371362	16	81632919	81633115	196	81633008	16	187838, 15556	in gene, in gene
	CMIP, MIR6504	16	81616422	81616866	444	81616672	22	171502, 5324	in gene, downstream
	CMPK1	1	47333846	47334473	627	47334016	43	219	in gene
	CMPK2, RSAD2	2	6865672	6866310	638	6865920	39	715, 80	in gene, in gene
	CMSS1, FILIP1L	3	99876126	99876383	257	99876256	25	58422, 238257	in gene, in gene
	CMTM4	16	66696240	66696525	285	66696384	17	323	in gene
	CMTM6, MIR548AY	3	32502382	32502855	473	32502496	27	415, 3893	in gene, downstream
	CMTR1	6	37433117	37433561	444	37433280	48	149	in gene
	CNBP, LOC105374101	3	129183581	129184108	527	129183760	41	207, -268	in gene, upstream
	CNEP1R1	16	50024925	50025432	507	50025152	55	-54	upstream
	CNIH1	14	54440816	54441585	769	54441376	118	54	in gene
	CNIH2, YIF1A, TMEM151A	11	66288767	66289328	561	66288896	20	10695, 271, -3006	downstream, in gene, upstream
	CNIH3, LOC102723817	1	224623911	224624266	355	224624064	30	189274, -7785	in gene, upstream
	CNIH3, LOC102723817	1	224616169	224616529	360	224616384	14	181594, -105	in gene, upstream
	CNIH4	1	224356931	224357177	246	224356976	13	165	in gene
	CNN2, ABCA7	19	1037826	1038168	342	1038016	18	11741, -2087	in gene, upstream
	CNN3, LOC105378862, LOC729970	1	94926660	94927436	776	94926864	22	359, 963, -1164	in gene, in gene, upstream
	CNNM2	10	102918212	102919157	945	102918560	54	267	in gene
	CNNM2	10	102917549	102918030	481	102917664	29	-629	upstream
	CNNM3, ANKRD23, ANKRD39	2	96839353	96840036	683	96839584	74	24632, 4437, 18435	downstream, in gene, downstream
	CNNM4, LOC100506036, CNNM3	2	96815986	96816610	624	96816320	97	55418, -2248, 1368	downstream, upstream, in gene
	CNOT1	16	58629449	58629855	406	58629632	19	254	in gene
	CNOT10	3	32684987	32685587	600	32685184	41	39	in gene
	CNOT10	3	32781484	32781800	316	32781696	17	96551	downstream
	CNOT11, LOC105373511	2	101252514	101253502	988	101253216	58	333, 13454	in gene, downstream
	CNOT3, LOC102724273, LENG1, TMC4	19	54159482	54159849	367	54159552	20	21863, -7333, 191, 13698	downstream, upstream, in gene, downstream
	CNOT4	7	135509887	135510390	503	135510208	32	-81	upstream
	CNOT6L	4	77819272	77819614	342	77819424	60	814	in gene
	CNOT6L	4	77819768	77820640	872	77820448	41	-210	upstream
	CNOT6L	4	77818597	77819174	577	77818976	23	1262	in gene
	CNOT7, VPS37A	8	17246555	17247348	793	17246784	47	94, -108	in gene, upstream
	CNPY2, PAN2	12	56315752	56315999	247	56315840	27	504, 18213	in gene, downstream
	CNR2	1	23902698	23903029	331	23902829	10	10498	in gene
	COA1, LOC105375255	7	43648742	43649048	306	43648896	51	80645, -820	in gene, upstream
	COA1, LOC105375255	7	43649738	43650030	292	43649856	27	79685, 140	in gene, in gene
	COA4, PAAF1	11	73876647	73876843	196	73876736	20	109, 37	in gene, in gene
	COA5, UNC50	2	98608151	98608891	740	98608672	71	-154, 93	upstream, in gene
	COASY, MLX, PSMC3IP	17	42566997	42567564	567	42567104	34	5030, 44, 10727	downstream, in gene, downstream
	COBL	7	51213670	51213868	198	51213776	18	103042	in gene
	COBLL1, LOC101929633	2	164840857	164841232	375	164841024	16	1144, 275	in gene, in gene
	COG1	17	73193084	73193484	400	73193280	29	246	in gene
	COG2	1	230642311	230642744	433	230642496	70	40	in gene
	COG3	13	45464790	45465115	325	45465056	28	161	in gene
	COG4, SF3B3, SNORD111B	16	70523493	70524062	569	70523648	25	-94, -140, -5851	upstream, upstream, upstream
	COG6, MIR4305	13	39655681	39656065	384	39655840	31	213, 8295	in gene, downstream
	COG7	16	23452814	23453314	500	23453184	24	26	in gene
	COL11A2, RXRB, SLC39A7, HSD17B8, MIR219A1, RING1	6	33200196	33200567	371	33200384	35	-7232, 469, -442, -4253, -7451, -8125	upstream, in gene, upstream, upstream, upstream, upstream
	COL15A1	9	99057935	99058195	260	99058016	21	114668	in gene
	COL15A1	9	99041704	99041909	205	99041776	19	98428	in gene
	COL18A1, SLC19A1	21	45513219	45513486	267	45513312	26	108175, 49814	in gene, in gene
	COL19A1	6	69867170	69867512	342	69867328	21	772	in gene
	COL1A1, LOC105371821	17	50200638	50200969	331	50200736	20	912, -8629	in gene, upstream
	COL23A1	5	178249241	178249835	594	178249344	34	341211	in gene
	COL23A1	5	178590179	178590697	518	178590389	18	166	in gene
	COL26A1	7	101363759	101364008	249	101363856	13	1036	in gene
	COL4A4, COL4A3, LOC105373917	2	227164618	227164815	197	227164672	16	-113, 107, -7383	upstream, in gene, upstream
	COL6A2	21	46098116	46098361	245	46098208	21	602	in gene
	COL9A2	1	40315310	40315694	384	40315456	34	2234	in gene
	COL9A2	1	40316552	40316838	286	40316640	27	1050	in gene
	COLGALT2	1	183956631	183956847	216	183956720	14	94891	in gene
	COLGALT2, TSEN15	1	184051624	184051845	221	184051696	24	-85, 45	upstream, in gene
	COMMD10	5	116084835	116085384	549	116084976	27	1331	in gene
	COMMD3-BMI1, BMI1, SPAG6	10	22335366	22335915	549	22335552	28	19169, 14342, -9864	downstream, downstream, upstream
	COMMD3-BMI1, BMI1, SPAG6	10	22340499	22340934	435	22340704	27	24321, 19494, -4712	downstream, downstream, upstream
	COMMD3-BMI1, BMI1, SPAG6	10	22336316	22336681	365	22336528	23	20145, 15318, -8888	downstream, downstream, upstream
	COMMD3-BMI1, COMMD3, BMI1	10	22321374	22321668	294	22321536	24	5153, 5153, 326	in gene, downstream, in gene
	COMMD3-BMI1, COMMD3, BMI1	10	22315966	22316271	305	22316096	17	-287, -287, -5114	upstream, upstream, upstream
	COMMD4, NEIL1, MIR631, MAN2C1	15	75349801	75350379	578	75350080	112	14084, 3431, 3605, 19034	downstream, in gene, downstream, downstream
	COMMD4, NEIL1, MIR631, MAN2C1	15	75347275	75347504	229	75347360	22	11364, 711, 6325, 21754	downstream, in gene, downstream, downstream
	COMMD4, NEIL1, MIR631, MAN2C1	15	75348059	75348404	345	75348256	21	12260, 1607, 5429, 20858	downstream, in gene, downstream, downstream
	COMMD4, NEIL1, MIR631, MAN2C1	15	75348962	75349317	355	75349184	18	13188, 2535, 4501, 19930	downstream, in gene, downstream, downstream
	COMMD6, UCHL3	13	75549411	75549926	515	75549792	22	-353, 925	upstream, in gene
	COMMD7	20	32743287	32743598	311	32743456	26	552	in gene
	COMMD8	4	47463430	47463669	239	47463520	20	145	in gene
	COPB1, PSMA1	11	14499613	14500010	397	14499808	107	87, 143826	in gene, downstream
	COPB2, LOC100507291	3	139389380	139389635	255	139389488	19	192, -315	in gene, upstream
	COPE, DDX49, HOMER3	19	18919152	18919799	647	18919680	30	-216, 5, 21578	upstream, in gene, downstream
	COPG1	3	129249163	129249744	581	129249440	54	-135	upstream
	COPG1, MIR6826, HMCES	3	129278951	129279217	266	129279040	22	29465, 6894, 224	downstream, downstream, in gene
	COPG1, MIR6826, HMCES	3	129278301	129278733	432	129278368	13	28793, 6222, -448	downstream, downstream, upstream
	COPG2, LOC105375506, TSGA13	7	130668532	130669067	535	130668672	27	86, -6045, 18760	in gene, upstream, in gene
	COPS2, GALK2	15	49155206	49155475	269	49155317	21	340, -442	in gene, upstream
	COPS4	4	83034554	83035413	859	83034848	41	-238	upstream
	COPS6, MCM7, MIR25, MIR93, MIR106B, AP4M1, TAF6, LOC105375424	7	100100353	100101733	1380	100100672	70	11712, 1268, -7029, -6825, -6598, -740, 19186, -7812	downstream, in gene, upstream, upstream, upstream, upstream, downstream, upstream
	COPS6, MCM7, MIR25, MIR93, MIR106B, AP4M1, TAF6, LOC105375424	7	100101961	100102214	253	100102112	19	13152, -172, -8469, -8265, -8038, 700, 17746, -6372	downstream, upstream, upstream, upstream, upstream, in gene, downstream, upstream
	COPS7A	12	6723848	6724274	426	6724096	30	112	in gene
	COPS8	2	237085696	237086089	393	237085888	56	447	in gene
	COPZ1	12	54324451	54324836	385	54324704	19	-386	upstream
	COPZ1, GPR84, LOC102724050, ZNF385A	12	54359215	54359456	241	54359328	20	34238, 5925, 5637, 31977	downstream, in gene, in gene, downstream
	COPZ2, NFE2L1	17	48047598	48048735	1137	48048000	119	91, -324	in gene, upstream
	COQ10B	2	197453596	197453838	242	197453760	18	253	in gene
	COQ2	4	83217719	83218005	286	83217872	16	67217	in gene
	COQ2, HPSE	4	83284337	83284914	577	83284544	68	545, 50609	in gene, downstream
	COQ4, TRR-TCT3-2, SLC27A4	9	128340194	128340459	265	128340256	19	17744, -90, -304	downstream, upstream, upstream
	COQ5, RNF10	12	120534354	120535114	760	120534880	21	-5719, 572	upstream, in gene
	COQ9, POLR2C, DOK4	16	57462520	57462823	303	57462656	52	15231, 369, 23817	downstream, in gene, downstream
	CORO1A, BOLA2B, SLX1A, SLX1A-SULT1A3	16	30185840	30187534	1694	30186816	103	3406, 7490, -7027, -7617	in gene, downstream, upstream, upstream
	CORO1A, BOLA2B, SLX1A, SLX1A-SULT1A3	16	30183374	30184789	1415	30184224	39	814, 10082, -9619, -10209	in gene, downstream, upstream, upstream
	CORO1A, BOLA2B, SLX1A, SLX1A-SULT1A3	16	30185003	30185224	221	30185184	19	1774, 9122, -8659, -9249	in gene, downstream, upstream, upstream
	CORO1C, LOC105369969	12	108731276	108731802	526	108731552	30	-2, -1857	upstream, upstream
	CORO1C, LOC105369969	12	108730761	108731042	281	108730880	18	670, -2529	in gene, upstream
	CORO2B	15	68578399	68578644	245	68578480	19	19205	in gene
	CORO7-PAM16, CORO7, DNAJA3	16	4415957	4417073	1116	4416512	53	449, 449, -9293	in gene, in gene, upstream
	CORO7-PAM16, CORO7, DNAJA3	16	4425454	4425783	329	4425648	27	-8687, -8687, -157	upstream, upstream, upstream
	CORO7-PAM16, PAM16, CORO7	16	4350918	4351377	459	4351264	24	65697, 108, 65697	in gene, in gene, downstream
	COTL1	16	84594175	84594459	284	84594304	50	23792	in gene
	COTL1	16	84617445	84617991	546	84617824	26	272	in gene
	COTL1	16	84618082	84618279	197	84618192	17	-96	upstream
	COX10	17	14205928	14206133	205	14206064	16	136662	in gene
	COX10-AS1, COX10	17	14069266	14069775	509	14069408	19	50, 6	in gene, in gene
	COX18, ANKRD17	4	73069341	73069773	432	73069584	35	175, 189558	in gene, downstream
	COX19, C7orf50, CYP2W1	7	974943	975401	458	975168	26	431, 163107, -7988	in gene, downstream, upstream
	COX20, HNRNPU-AS1	1	244835032	244835813	781	244835392	34	55, 11549	in gene, downstream
	COX20, HNRNPU-AS1	1	244833992	244834231	239	244834080	11	-1257, 12861	upstream, downstream
	COX5A	15	74937443	74938219	776	74937856	52	298	in gene
	COX6A1, TRIAP1, GATC	12	120446315	120446902	587	120446512	71	8422, -100, 74	downstream, upstream, in gene
	COX6A1, TRIAP1, GATC	12	120438002	120438283	281	120438144	29	54, 8268, -8294	in gene, downstream, upstream
	COX6B2, FAM71E2, IL11	19	55359001	55359197	196	55359080	14	-4266, 4172, 11383	upstream, in gene, downstream
	COX6C	8	99893321	99893873	552	99893696	47	318	in gene
	COX7A2L	2	42360920	42361438	518	42361104	42	7906	in gene
	COX7B, ATP7A	X	77910534	77910818	284	77910624	31	11160, -32	downstream, upstream
	COX7C, MIR3607	5	86618069	86618389	320	86618176	18	209, -2321	in gene, upstream
	COX8A, OTUB1	11	63985875	63986294	419	63985984	24	11377, 131	downstream, in gene
	CPD	17	30378819	30379727	908	30378976	42	66	in gene
	CPEB2-AS1, CPEB2, LOC101929095	4	15001792	15004729	2937	15002496	96	-451, 45, 425418	upstream, in gene, downstream
	CPEB3, MARCH5	10	92291148	92291617	469	92291312	22	-194, 149	upstream, in gene
	CPEB4	5	173887845	173888212	367	173888016	25	-312	upstream
	CPEB4	5	173888323	173888768	445	173888544	17	216	in gene
	CPLX2	5	175796971	175797317	346	175797120	45	581	in gene
	CPM	12	68933113	68933356	243	68933168	13	30072	in gene
	CPNE1, RBM12, NFS1	20	35664169	35664974	805	35664784	36	172, 172, 34581	in gene, in gene, downstream
	CPNE6, NRL	14	24081362	24081839	477	24081440	23	10603, 33362	downstream, in gene
	CPNE9, BRPF1	3	9730976	9732404	1428	9731616	91	27804, -113	downstream, upstream
	CPPED1	16	12803648	12803952	304	12803776	25	111	in gene
	CPQ	8	96645039	96645537	498	96645216	31	-11	upstream
	CPQ	8	96854056	96854291	235	96854128	27	208901	in gene
	CPSF1, SLC39A4, VPS28	8	144413301	144414060	759	144413536	26	-4136, 4498, 15027	upstream, in gene, downstream
	CPSF3, IAH1	2	9474707	9474985	278	9474864	31	51327, 332	downstream, in gene
	CPSF3, IAH1	2	9474268	9474539	271	9474400	20	50863, -132	downstream, upstream
	CPSF3L, CPTP, TAS1R3	1	1324797	1325206	409	1324928	17	-241, 172, -4071	upstream, in gene, upstream
	CPSF6	12	69239476	69239795	319	69239648	22	111	in gene
	CPSF6	12	69239980	69240309	329	69240064	16	527	in gene
	CPSF7, SDHAF2	11	61429498	61430420	922	61429968	80	24, -157	in gene, upstream
	CPT1A	11	68839186	68839709	523	68839472	50	2459	in gene
	CPT1A	11	68843611	68844154	543	68843888	30	-1957	upstream
	CPT1A	11	68840713	68841611	898	68840896	29	1035	in gene
	CPT1A	11	68816231	68816478	247	68816368	16	25563	in gene
	CPT2, C1orf123, MAGOH	1	53220195	53220456	261	53220352	23	23923, 287, 18258	downstream, in gene, downstream
	CPXM2, LOC105378533	10	123772070	123773505	1435	123773280	157	118704, -3478	in gene, upstream
	CR2	1	207454643	207454910	267	207454752	23	452	in gene
	CRACR2A	12	3728275	3728990	715	3728768	39	24432	in gene
	CRACR2A	12	3752871	3753342	471	3753184	24	16	in gene
	CRACR2B, CD151, POLR2L, TSPAN4	11	837613	837880	267	837760	26	11616, 4808, 4769, -5064	downstream, in gene, downstream, upstream
	CRADD	12	93677501	93677992	491	93677600	30	249	in gene
	CRAMP1L, HN1L	16	1677907	1678639	732	1678144	39	63504, -133	downstream, upstream
	CRCP	7	66114713	66115180	467	66114816	27	-2	upstream
	CREB1	2	207529118	207530345	1227	207529600	138	-292	upstream
	CREB3L2	7	138001522	138002098	576	138001728	24	373	in gene
	CREBBP	16	3818467	3818971	504	3818720	45	61400	in gene
	CREBBP	16	3880725	3881100	375	3880896	19	-776	upstream
	CREBBP	16	3879620	3879868	248	3879712	15	408	in gene
	CREBL2	12	12612018	12612291	273	12612160	27	327	in gene
	CREBRF	5	173056428	173056771	343	173056544	24	195	in gene
	CRELD1, PRRT3, PRRT3-AS1	3	9946533	9946921	388	9946720	33	12932, 5674, -684	downstream, in gene, upstream
	CRELD2	22	49936116	49936509	393	49936288	31	17658	downstream
	CRELD2	22	49934194	49934466	272	49934336	22	15706	downstream
	CRELD2	22	49934918	49935227	309	49935072	22	16442	downstream
	CRELD2	22	49933483	49933686	203	49933552	19	14922	downstream
	CRIP2, LOC105378191, CRIP1, C14orf80	14	105489753	105491680	1927	105491328	46	18390, 9559, 4408, 1473	downstream, downstream, downstream, in gene
	CRIP2, LOC105378191, CRIP1, C14orf80	14	105481885	105482219	334	105481936	20	8998, 167, -4984, -7919	downstream, in gene, upstream, upstream
	CRIP2, LOC105378191, CRIP1, C14orf80	14	105485915	105486404	489	105486032	20	13094, 4263, -888, -3823	downstream, in gene, upstream, upstream
	CRIP2, LOC105378191, CRIP1, C14orf80	14	105489264	105489602	338	105489424	20	16486, 7655, 2504, -431	downstream, downstream, downstream, upstream
	CRIP2, LOC105378191, CRIP1, C14orf80	14	105487266	105487606	340	105487456	19	14518, 5687, 536, -2399	downstream, downstream, in gene, upstream
	CRIP2, LOC105378191, CRIP1, C14orf80	14	105487788	105488248	460	105487936	19	14998, 6167, 1016, -1919	downstream, downstream, in gene, upstream
	CRK, MYO1C	17	1463214	1463481	267	1463344	36	-7077, 29363	upstream, downstream
	CRK, MYO1C	17	1455673	1456590	917	1456224	25	43, 36483	in gene, downstream
	CRKL	22	20916987	20917529	542	20917152	22	-246	upstream
	CRLF1, TMEM59L	19	18612872	18613113	241	18612992	22	-6142, 5557	upstream, in gene
	CRLF3, ATAD5	17	30824643	30824933	290	30824672	19	88, -6804	in gene, upstream
	CRNKL1, CFAP61	20	20052239	20052771	532	20052368	43	3678, -146	in gene, upstream
	CROCC	1	16914186	16914471	285	16914368	23	18661	in gene
	CROCC, RNU1-2	1	16904839	16905213	374	16905024	36	9317, 9044	in gene, downstream
	CRTAM	11	122856611	122856890	279	122856752	36	18321	in gene
	CRTAP	3	33114076	33114562	486	33114336	33	378	in gene
	CRTC2, SLC39A1, MIR6737, CREB3L4	1	153958102	153958655	553	153958496	25	160, 9688, 3924, -9343	in gene, downstream, downstream, upstream
	CRTC2, SLC39A1, MIR6737, CREB3L4, JTB	1	153967307	153967624	317	153967488	24	-8832, 696, -5068, -351, 10487	upstream, in gene, upstream, upstream, downstream
	CRTC3	15	90530282	90530660	378	90530400	20	514	in gene
	CRTC3-AS1, LINC01585	15	90665385	90665885	500	90665472	18	51668, 5238	in gene, downstream
	CRTC3-AS1, LINC01585	15	90661367	90661572	205	90661472	15	55668, 1238	in gene, in gene
	CRY1	12	107093162	107094085	923	107093792	59	65	in gene
	CRYBB1, CRYBA4	22	26610514	26610869	355	26610635	16	7452, 2648	in gene, in gene
	CRYGN	7	151448416	151448612	196	151448496	14	-77	upstream
	CRYGN, MIR3907	7	151429936	151430209	273	151430080	19	18339, 3559	in gene, downstream
	CRYL1	13	20419555	20420000	445	20419744	37	106129	in gene
	CRYL1	13	20475948	20476147	199	20476048	28	49825	in gene
	CRYZL1, ITSN1	21	33642047	33642946	899	33642368	21	-514, -32	upstream, upstream
	CRYZL1, ITSN1	21	33643114	33643387	273	33643216	16	-1362, 816	upstream, in gene
	CS, CNPY2	12	56299714	56300435	721	56300000	32	391, 16344	in gene, downstream
	CSAD, ZNF740	12	53180407	53181083	676	53180640	28	269, -111	in gene, upstream
	CSDE1	1	114757360	114757865	505	114757728	20	322	in gene
	CSDE1	1	114757943	114758226	283	114758096	20	-46	upstream
	CSGALNACT1	8	19461744	19462138	394	19461920	38	295351	in gene
	CSGALNACT1	8	19696419	19696684	265	19696528	30	60743	in gene
	CSK, LOC105370896	15	74800020	74800281	261	74800112	21	18028, -1878	in gene, upstream
	CSK, MIR4513	15	74782556	74782844	288	74782688	34	604, 6069	in gene, downstream
	CSK, MIR4513, LOC105370896	15	74787444	74788310	866	74787680	70	5596, 1077, 10554	in gene, downstream, downstream
	CSK, MIR4513, LOC105370896	15	74788647	74789140	493	74789008	33	6924, -251, 9226	in gene, upstream, downstream
	CSNK1A1, ARHGEF37	5	149551042	149551818	776	149551200	66	352, -432	in gene, upstream
	CSNK1D	17	82273068	82273734	666	82273248	50	494	in gene
	CSNK1G2	19	1967067	1967675	608	1967216	38	26067	in gene
	CSNK1G2	19	1966605	1966869	264	1966752	23	25603	in gene
	CSNK1G3	5	123511982	123512587	605	123512336	28	237	in gene
	CSNK1G3	5	123515972	123516227	255	123516064	27	3965	in gene
	CSNK1G3	5	123512817	123513057	240	123512928	14	829	in gene
	CSRNP1, LOC101928263	3	39152975	39153258	283	39153072	20	1525, 2169	in gene, in gene
	CSRNP1, LOC101928263	3	39153361	39153680	319	39153520	17	1077, 2617	in gene, in gene
	CSRNP2	12	51083350	51083719	369	51083440	27	231	in gene
	CST7	20	24948970	24949945	975	24949152	53	-78	upstream
	CSTB, LOC105372825	21	43776151	43776793	642	43776224	20	151, 3047	in gene, downstream
	CTAGE5, LOC100288846	14	39266506	39267697	1191	39267232	106	1960, -171	in gene, upstream
	CTBP1, CTBP1-AS2, LOC105374345	4	1249240	1249765	525	1249408	52	840, -32, -7012	in gene, upstream, upstream
	CTBP1, CTBP1-AS2, LOC105374345	4	1249914	1250225	311	1250048	23	200, 608, -6372	in gene, in gene, upstream
	CTBP1, LOC101928588, CTBP1-AS2, LOC105374345	4	1247441	1248696	1255	1248256	39	1992, -10400, -1184, -8164	in gene, upstream, upstream, upstream
	CTBP1, LOC101928588, CTBP1-AS2, LOC105374345	4	1246040	1246760	720	1246496	22	3752, -8640, -2944, -9924	in gene, upstream, upstream, upstream
	CTBP2	10	125015290	125015718	428	125015456	66	145599	in gene
	CTBP2	10	125151622	125152349	727	125151936	41	9119	in gene
	CTBP2	10	125159503	125160256	753	125160032	19	1023	in gene
[truncated: 10,123 more rows]
